# Supplementary material for: The bioavailability of polyphenols following acute consumption of pigmented barley and wheat
Source: Royal Society of Chemistry journal article supplement (doi:10.1039/d4fo01162g), 2024-01-01
Supplement: d4fo01162g1.pdf [file d4fo01162g1.pdf]

## Supplementary Materials

### The bioavailability of polyphenols following acute consumption of pigmented barley and wheat

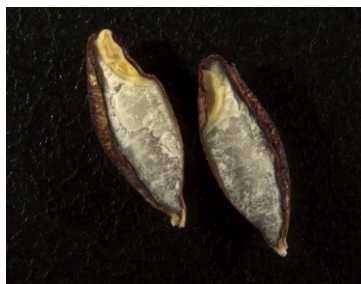

A. Purple Barley

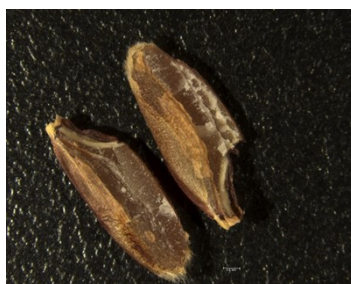

B. Purple Wheat

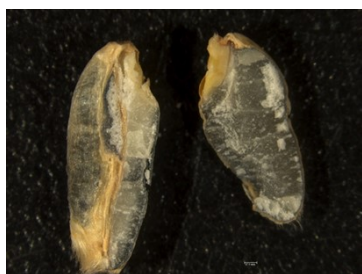

C. Blue Wheat

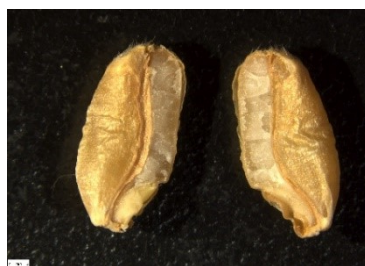

D. Regular Wheat

**Figure S1.** Images of whole grain seeds used in study cut in cross sections, Pictures taken with an optical microscope (Leica DM 750 Microsystems, Wetzlar, Germany)

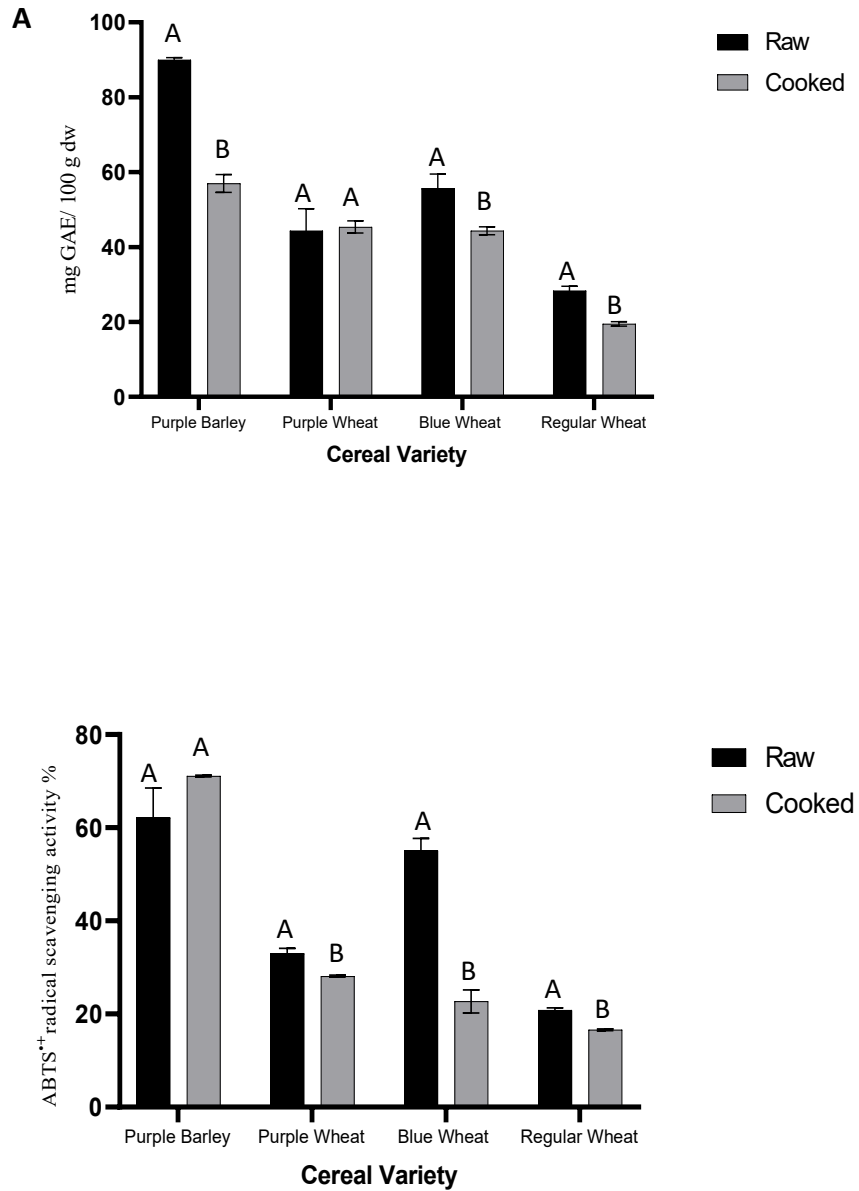

**Figure S2.** Comparison of total phenolic content (A) and total antioxidant capacity (B) between methanol extracts of raw and cooked grain measured using Folin-Ciocalteu and ABTS radical scavenging assay. Data are expressed as mg GAE/ 100g dry cereal flour and as percentages for the total phenolic content and total antioxidant activity respectively. Mean  $\pm$  SD; n=3. Different letters represent significant differences between the grains ( $p < 0.05$ )

### A. Cooked Purple Barley

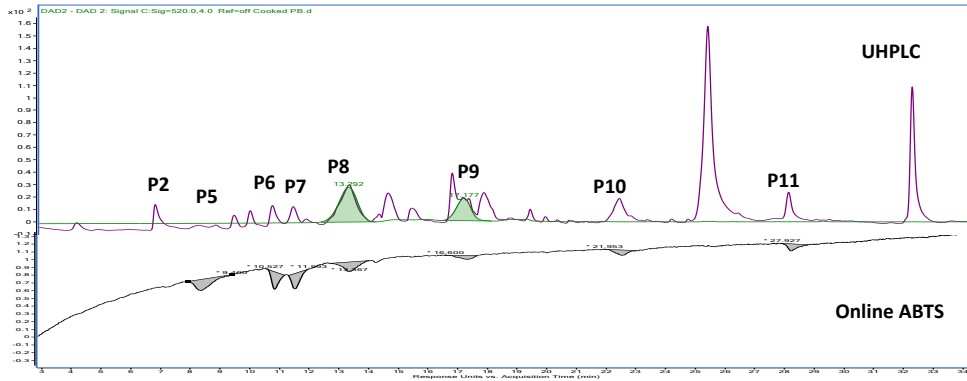

### B. Cooked Purple wheat

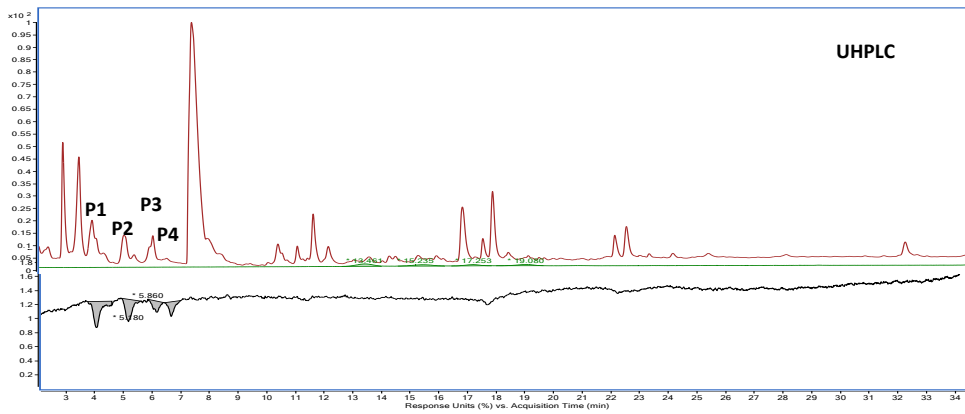

### C. Cooked Blue wheat

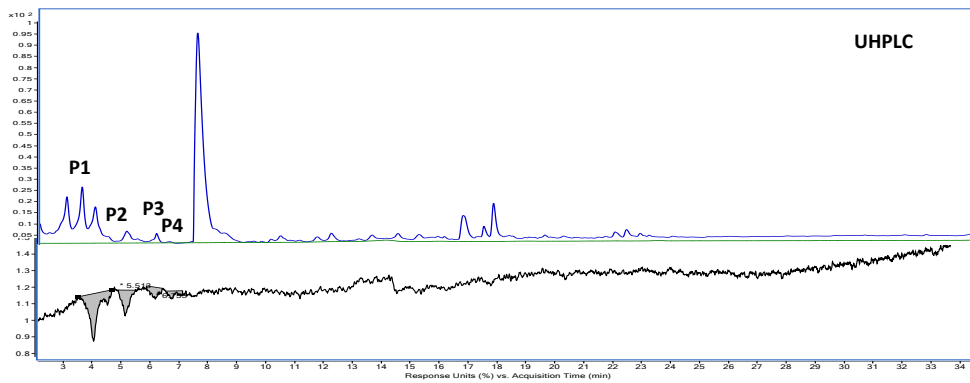

#### D. Cooked Regular wheat

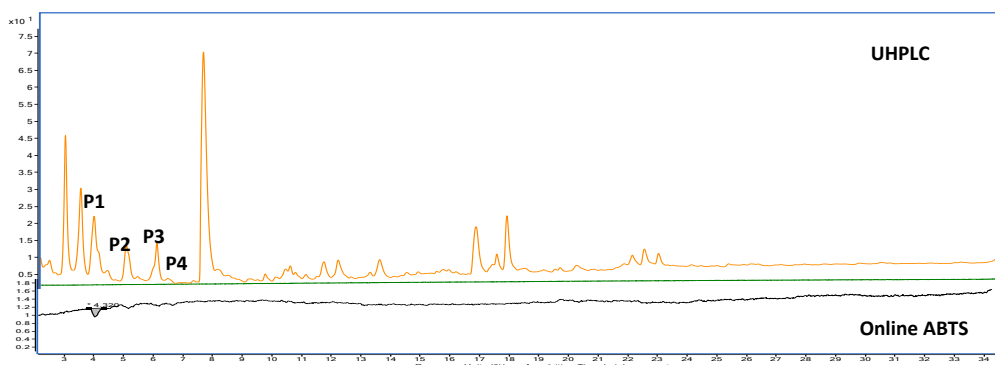

**Figure S3.** UHPLC – online ABTS mapping of extracts from cooked grain; Cooked purple barley (A), cooked purple wheat (A), cooked blue wheat (C) and cooked regular wheat (D). Green line: anthocyanin profile; Black line: online ABTS profile; Purple line: cooked purple barley phenolic profile; Red line: cooked purple wheat phenolic profile; Blue line: cooked blue wheat phenolic profile; Orange line: cooked regular wheat phenolic profile

**Table S1.** Baseline characteristics influencing anthropometric, biochemical, and haematological profiles.

| Parameter                 | Mean  | SD   | Reference range |
|---------------------------|-------|------|-----------------|
| Age                       | 28.8  | 5.9  |                 |
| Height (m)                | 1.7   | 0.1  |                 |
| Weight (Kg)               | 74.6  | 9.8  |                 |
| BMI (Kg/m <sup>2</sup> )  | 23.9  | 1.4  |                 |
| Systole BP                | 119.5 | 11.3 |                 |
| Diastole BP               | 73.7  | 6.9  |                 |
| Pulse                     | 12.5  | 12.5 |                 |
| Hb (g/L)                  | 140.4 | 81   | 115–180         |
| RCC (10 <sup>12</sup> /L) | 4.67  | 0.7  | 3.9–5.7         |
| HCT (L/L)                 | 0.42  | 0.04 | 0.36–0.54       |
| RDW (%)                   | 14.6  | 0.6  | 11–15           |
| MCV (fL)                  | 90.4  | 3.4  | 82–98           |
| WCC (10 <sup>9</sup> /L)  | 6.63  | 2.1  | 3.7–9.5         |
| PLT (10 <sup>9</sup> /L)  | 243.7 | 81   | 150–400         |
| Urea (mmol/L)             | 4.6   | 2.0  | 3.0–10.0        |
| Glucose (mmol/L)          | 4.1   | 1.2  | 3.0–5.4         |
| Cholesterol (mmol/L)      | 5.4   | 1.3  | 3.0–5.5         |
| Calcium (mmol/L)          | 2.4   | 0.3  | 2.10–2.60       |
| Magnesium (mmol/L)        | 0.67  | 0.2  | 0.70–1.10       |

Values are presented as mean  $\pm$  SD, n = 6. Blood pressure: BP; body mass index: BMI; mean corpuscular volume: MCV; platelets, PLTS; red cell count, RCC; red cell distribution width, RDW; white cell count, WCC; N/A: Not Applicable

Baseline anthropometric, full blood count and biochemical parameters were measured and found to be within the normal reference ranges established by the Royal College of Pathologist of Australasia the baseline parameters are presented in Table 2.

**Table S2.** Recovery of phenolic standards in plasma

| Standard                | matrix | Spiked concentration | % recovery |
|-------------------------|--------|----------------------|------------|
| Ferulic acid            | plasma | 500                  | 96.2       |
| Cyanidin 3 O- glucoside | plasma | 500                  | 82.1       |
| Hippuric acid           | urine  | 500                  | 100        |

**A. Plasma protocatechuic acid levels**

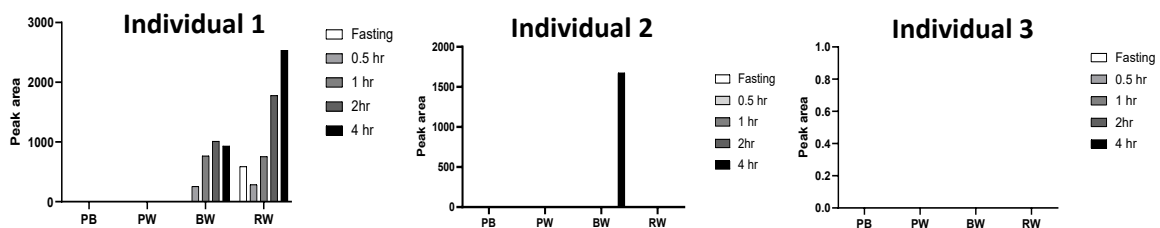

**B. Plasma caffeic acid levels**

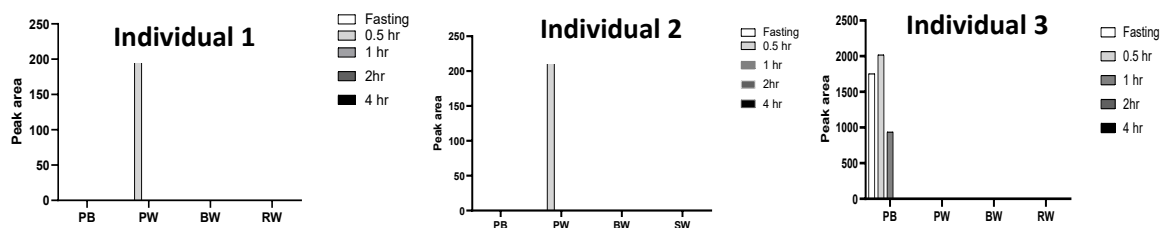

**C. Plasma hippuric acid levels**

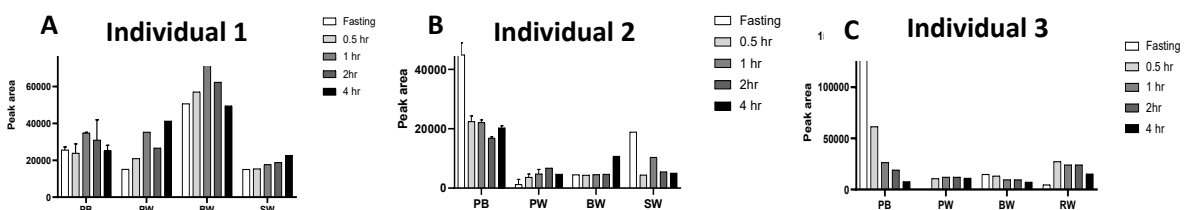

**Figure S4** Plasma levels of protocatechuic acid (A), caffeic acid (B) and hippuric acid (C) compared to baseline fasting levels after consumption of the cereal grain varieties by 3 individuals.

**Table S3:** Selected metabolites detected from mass spectrometry analysis of urine

| Preliminary identification       | RT (min) | m/z      |
|----------------------------------|----------|----------|
| Hydroxyhippuric acid             | 6.7      | 194.0555 |
| 4-Hydroxyhippuric acid sulphate  | 7.0      | 194.0555 |
| Ferulic acid 4- O sulphate       | 8.4      | 273.2500 |
| Dihydrocaffeic acid 3-O sulphate | 7.6      | 261.2370 |
| N-feruloylglycine                | 7.8      | 250.2300 |

**Table S4.** Percentage of phenolic compound absorbed and excreted.

| Phenolic acid       | % Bioavailability (Plasma) |     |     |     | % Urinary Excretion |      |      |      |
|---------------------|----------------------------|-----|-----|-----|---------------------|------|------|------|
|                     | PB                         | PW  | BW  | RW  | PB                  | PW   | BW   | RW   |
| Protocatechuic acid | N/A                        | N/A | 1.8 | 5.9 | 1.5                 | 4.1  | 44.9 | 88.5 |
| Caffeic acid        | 1.5                        | 1.3 | N/A | N/A | 16.1                | 17.2 | 63.0 | 94.3 |

Values are average percentages calculated by dividing the amount of phenolic detected in biofluid by the amount found in the cooked cereal grain extract. N/A: Not Applicable
