# Supplementary material for: The bioavailability of polyphenols following acute consumption of pigmented barley and wheat
Source: Royal Society of Chemistry journal article supplement (doi:10.1039/d4fo01162g), 2024-01-01
Supplement: d4fo01162g2.xlsx [file d4fo01162g2.xlsx]

## Sheet: Meal
Show/Hide	Cpd	File	ID Source	Name	Formula	Flags (Tgt)	Saturated	RT	m/z	Mass	Score	Score (Lib)	Score (DB)	Score (MFG)	RT Diff (Tgt)	Diff (Tgt, ppm)	Diff (DB, ppm)	Diff (MFG, ppm)	Polarity	Ions	Height	Area	Vol	Hits (DB)	Algorithm	Library	AGILENTID	MPPID	NCBI ID	Formula (DB)	Formula (MFG)	Modified	Primary Base	Primary Note	Formula (Tgt)	Score (MFE)
TRUE	18	BW cooked rpt.d						1.606	101.025	102.032									Negative	2	16213		71452		Find by Molecular Feature											90.9
TRUE	17	BW cooked rpt.d	DBSearch	L-Serine	C3 H7 N O3			1.594	104.036	105.043	86.41		86.41				-4.17		Negative	2	15117		61216	4	Find by Molecular Feature											93
TRUE	12	PB cooked.d	DBSearch	L-Serine	C3 H7 N O3			1.585	104.036	105.043	85.47		85.47				-4.26		Negative	2	6150		30878	4	Find by Molecular Feature											85.7
TRUE	80	PB cooked.d	DBSearch	Resorcinol	C6 H6 O2			6.644	109.029	110.037	87.52		87.52				2.07		Negative	2	55920		547499	5	Find by Molecular Feature											100
TRUE	86	PW cooked.d	DBSearch	Resorcinol	C6 H6 O2			6.647	109.03	110.037	86.39		86.39				-3.91		Negative	2	36044		332500	5	Find by Molecular Feature											100
TRUE	72	BW cooked rpt.d						6.631	109.03	110.037									Negative	2	8772		83010		Find by Molecular Feature											100
TRUE	38	SW cooked.d	DBSearch	3-Hydroxy-2H-pyran-2-one	C5 H4 O3			5.524	111.009	112.016	85.04		85.04				-2.81		Negative	2	11242		158331	4	Find by Molecular Feature											96.6
TRUE	46	PW cooked.d						5.541	111.01	112.017									Negative	2	9880		168710		Find by Molecular Feature											98.5
TRUE	81	PW cooked.d						6.428	111.01	112.017									Negative	2	10261		104283		Find by Molecular Feature											100
TRUE	44	PB cooked.d						5.524	111.01	112.017									Negative	2	16630		285101		Find by Molecular Feature											100
TRUE	77	PB cooked.d						6.416	111.01	112.017									Negative	2	13560		146800		Find by Molecular Feature											100
TRUE	27	PB cooked.d						2.513	111.01	112.017									Negative	2	12161		131510		Find by Molecular Feature											100
TRUE	10	PW cooked.d	DBSearch	trifluoroacetic acid	C2 H F3 O2			1.493	112.986	113.993	87.5		87.5				0.12		Negative	2	16821		104455	1	Find by Molecular Feature											100
TRUE	8	PB cooked.d	DBSearch	trifluoroacetic acid	C2 H F3 O2			1.514	112.986	113.993	87.78		87.78				-0.25		Negative	2	13203		79729	1	Find by Molecular Feature											100
TRUE	5	BW cooked rpt.d	DBSearch	trifluoroacetic acid	C2 H F3 O2			1.49	112.986	113.993	87.58		87.58				-1.06		Negative	2	18612		141848	1	Find by Molecular Feature											100
TRUE	21	PW cooked.d						1.582	114.02	115.028									Negative	2	8037		39113		Find by Molecular Feature											86.1
TRUE	4	PW cooked.d						1.402	114.987	115.994									Negative	2	32835		298393		Find by Molecular Feature											100
TRUE	1	BW cooked rpt.d						1.394	114.988	115.996									Negative	2	18995		165554		Find by Molecular Feature											100
TRUE	4	PB cooked.d						1.408	114.988	115.996									Negative	2	35656		377429		Find by Molecular Feature											100
TRUE	4	SW cooked.d						1.403	114.989	115.996									Negative	2	44832		479604		Find by Molecular Feature											100
TRUE	31	BW cooked rpt.d						1.873	115.004	116.012									Negative	3	12957		113088		Find by Molecular Feature											84.3
TRUE	30	PW cooked.d						2.014	115.004	116.012									Negative	3	32291		644896		Find by Molecular Feature											99.7
TRUE	31	SW cooked.d						2.021	115.004	116.012									Negative	3	35106		798009		Find by Molecular Feature											100
TRUE	24	PB cooked.d						2.054	115.004	116.012									Negative	3	52596		780654		Find by Molecular Feature											87
TRUE	20	PB cooked.d						1.898	115.005	116.012									Negative	3	46921		346215		Find by Molecular Feature											86.9
TRUE	77	BW cooked rpt.d						7.078	116.052	117.059									Negative	2	14398		140399		Find by Molecular Feature											100
TRUE	5	PB cooked.d						1.411	116.987	117.994									Negative	2	5464		48890		Find by Molecular Feature											100
TRUE	34	SW cooked.d						3.047	117.02	118.027									Negative	2	20327		357419		Find by Molecular Feature											80
TRUE	37	PW cooked.d						3.061	117.02	118.027									Negative	2	17708		328831		Find by Molecular Feature											100
TRUE	33	PB cooked.d						3.055	117.02	118.027									Negative	2	18897		380134		Find by Molecular Feature											100
TRUE	111	PB cooked.d	DBSearch	Benzoic acid	C7 H6 O2			8.059	121.029	122.037	82.12		82.12				1.93		Negative	2	6212		45867	6	Find by Molecular Feature											100
TRUE	87	SW cooked.d	DBSearch	3-Octen-2-one	C8 H14 O			8.422	125.097	126.105	85.61		85.61				-2.53		Negative	2	15579		121262	10	Find by Molecular Feature											98.6
TRUE	37	BW cooked rpt.d						2.906	128.036	129.044									Negative	2	43924		982288		Find by Molecular Feature											85.3
TRUE	35	PW cooked.d						2.919	128.036	129.044									Negative	3	131643		2930446		Find by Molecular Feature											100
TRUE	30	PB cooked.d						2.903	128.037	129.044									Negative	3	103258		2414950		Find by Molecular Feature											100
TRUE	15	SW cooked.d	DBSearch	Chlorate	Cl H O3			1.522	128.96	83.9617	66.14		66.14				-3.65		Negative	3	47079		312960	1	Find by Molecular Feature											100
TRUE	15	BW cooked rpt.d	DBSearch	Chlorate	Cl H O3			1.507	128.96	83.9617	67.4		67.4				-3.74		Negative	3	54158		406678	1	Find by Molecular Feature											100
TRUE	11	PB cooked.d	DBSearch	Chlorate	Cl H O3			1.528	128.96	83.9618	66.8		66.8				-4.58		Negative	3	25817		164589	1	Find by Molecular Feature											97.8
TRUE	16	PW cooked.d	DBSearch	Chlorate	Cl H O3			1.506	128.96	83.9619	65.39		65.39				-5.75		Negative	3	39386		265919	1	Find by Molecular Feature											100
TRUE	52	PB cooked.d	DBSearch	Itaconic acid	C5 H6 O4			5.654	129.019	130.027	86.3		86.3				-0.69		Negative	3	14000		212335	10	Find by Molecular Feature											98.1
TRUE	53	BW cooked rpt.d	DBSearch	Itaconic acid	C5 H6 O4			5.66	129.02	130.027	86.03		86.03				-1.98		Negative	2	14392		232170	10	Find by Molecular Feature											100
TRUE	59	PB cooked.d	DBSearch	Pteridine	C6 H4 N4			5.927	131.036	132.043	86.79		86.79				2.74		Negative	2	7900		80430	1	Find by Molecular Feature											100
TRUE	30	BW cooked rpt.d	DBSearch	Tetrahydro-2-methyl-3-thiophenethiol	C5 H10 S2			1.868	133.015	134.023	66.81		66.81				-1.52		Negative	2	66368		570107	3	Find by Molecular Feature											87
TRUE	29	PW cooked.d	DBSearch	Tetrahydro-2-methyl-3-thiophenethiol	C5 H10 S2			2.002	133.015	134.023	80.84		80.84				-2.28		Negative	3	145714		3124994	3	Find by Molecular Feature											98.8
TRUE	30	SW cooked.d	DBSearch	Tetrahydro-2-methyl-3-thiophenethiol	C5 H10 S2			2.016	133.015	134.023	80.74		80.74				-2.68		Negative	4	164275		4065971	3	Find by Molecular Feature											98.6
TRUE	21	PB cooked.d						1.989	134.019	135.026									Negative	3	10829		288873		Find by Molecular Feature											89.5
TRUE	107	PW cooked.d						7.398	134.026	135.033									Negative	3	17864		144610		Find by Molecular Feature											100
TRUE	36	SW cooked.d	DBSearch	4-(Hydroxymethyl)benzenediazonium(1+)	C7 H7 N2 O			4.449	134.048	135.055	83.97		83.97				4.79		Negative	2	19574		320622	1	Find by Molecular Feature											100
TRUE	43	BW cooked rpt.d	DBSearch	4-(Hydroxymethyl)benzenediazonium(1+)	C7 H7 N2 O			4.375	134.048	135.055	85.4		85.4				2.88		Negative	2	17565		458780	1	Find by Molecular Feature											100
TRUE	40	PW cooked.d	DBSearch	4-(Hydroxymethyl)benzenediazonium(1+)	C7 H7 N2 O			4.434	134.048	135.055	84.42		84.42				3.12		Negative	2	26152		489362	1	Find by Molecular Feature											100
TRUE	99	PB cooked.d	DBSearch	Fluoroacetate	C2 H3 F O2			7.442	137.026	78.0122	54.64		54.64				-6.29		Negative	2	6592		48040	1	Find by Molecular Feature											80
TRUE	38	PW cooked.d						3.292	142.052	143.059									Negative	2	7476		151249		Find by Molecular Feature											96.5
TRUE	82	BW cooked rpt.d	DBSearch	Ethyl hydrogen fumarate	C6 H8 O4			7.213	143.036	144.043	64.2		64.2				-6.76		Negative	2	8354		115957	10	Find by Molecular Feature											95.8
TRUE	101	PW cooked.d	DBSearch	Ethyl hydrogen fumarate	C6 H8 O4			7.21	143.036	144.043	69.07		69.07				-5.64		Negative	2	9222		122175	10	Find by Molecular Feature											89.3
TRUE	66	SW cooked.d						7.194	143.036	144.043									Negative	2	14304		170626		Find by Molecular Feature											93.1
TRUE	76	PB cooked.d						6.401	143.036	144.043									Negative	2	6646		65120		Find by Molecular Feature											92.8
TRUE	90	SW cooked.d	DBSearch	Butyl lactate	C7 H14 O3			8.582	145.087	146.094	99.71		99.71				-0.38		Negative	3	36458		318686	10	Find by Molecular Feature											100
TRUE	19	SW cooked.d						1.601	146.048	147.055									Negative	2	10989		29790		Find by Molecular Feature											91.7
TRUE	39	PB cooked.d						5.123	150.044	151.051									Negative	2	8805		236351		Find by Molecular Feature											80
TRUE	79	PB cooked.d	DBSearch	2,6-dihydroxybenzoic acid	C7 H6 O4			6.642	153.02	154.027	99.4		99.4				-1.74		Negative	3	94130		854776	9	Find by Molecular Feature											100
TRUE	85	PW cooked.d						6.646	153.02	154.027									Negative	3	57181		537463		Find by Molecular Feature											100
TRUE	71	BW cooked rpt.d						6.631	153.02	154.028									Negative	2	13436		122983		Find by Molecular Feature											100
TRUE	90	PW cooked.d						6.881	158.083	159.091									Negative	2	10274		84793		Find by Molecular Feature											100
TRUE	5	PW cooked.d	DBSearch	2,4-Dichlorotoluene	C7 H6 Cl2			1.429	158.978	159.985	61.44		61.44				-3.74		Negative	4	60538		611341	2	Find by Molecular Feature											100
TRUE	3	BW cooked rpt.d						1.421	158.978	159.986									Negative	2	38591		256859		Find by Molecular Feature											96.7
TRUE	6	PB cooked.d						1.434	158.979	159.986									Negative	2	65482		700882		Find by Molecular Feature											100
TRUE	6	SW cooked.d						1.426	158.979	159.986									Negative	2	86816		900642		Find by Molecular Feature											100
TRUE	5	SW cooked.d						1.424	160.977	161.985									Negative	2	13129		124278		Find by Molecular Feature											100
TRUE	50	PB cooked.d	DBSearch	(2R,3S)-2,3-Dimethylmalate	C6 H10 O5			5.63	161.046	162.053	95.19		95.19				-0.92		Negative	3	7648		127972	10	Find by Molecular Feature											100
TRUE	51	BW cooked rpt.d	DBSearch	(2R,3S)-2,3-Dimethylmalate	C6 H10 O5			5.633	161.046	162.053	80.88		80.88				-2.5		Negative	2	9261		194405	10	Find by Molecular Feature											89.7
TRUE	22	BW cooked rpt.d	DBSearch	(-)-1-Methylpropyl 1-propenyl disulfide	C7 H14 S2			1.629	161.046	162.054	76.39		76.39				-2.85		Negative	4	39761		211094	1	Find by Molecular Feature											100
TRUE	23	SW cooked.d	DBSearch	(-)-1-Methylpropyl 1-propenyl disulfide	C7 H14 S2			1.617	161.047	162.054	77.98		77.98				-2.27		Negative	3	36954		111687	1	Find by Molecular Feature											89.2
TRUE	59	PW cooked.d	DBSearch	Methyl N-methylanthranilate	C9 H11 N O2			5.75	164.072	165.079	99.28		99.28				-1.35		Negative	3	22152		271214	10	Find by Molecular Feature											100
TRUE	56	PB cooked.d	DBSearch	Methyl N-methylanthranilate	C9 H11 N O2			5.747	164.072	165.079	99		99				-1.91		Negative	3	21857		268041	10	Find by Molecular Feature											100
TRUE	46	SW cooked.d	DBSearch	Methyl N-methylanthranilate	C9 H11 N O2			5.755	164.072	165.079	97.14		97.14				-3.32		Negative	3	15928		190761	10	Find by Molecular Feature											100
TRUE	55	BW cooked rpt.d						5.729	164.073	165.08									Negative	3	26890		358854		Find by Molecular Feature											100
TRUE	21	BW cooked rpt.d	DBSearch	3-Methylxanthine	C6 H6 N4 O2			1.617	165.042	166.049	86.89		86.89				1.49		Negative	2	11439		43811	6	Find by Molecular Feature											100
TRUE	24	PW cooked.d	DBSearch	3-Methylxanthine	C6 H6 N4 O2			1.62	165.042	166.049	86.8		86.8				1.41		Negative	2	11078		43191	6	Find by Molecular Feature											88.5
TRUE	24	SW cooked.d	DBSearch	3-Methylxanthine	C6 H6 N4 O2			1.619	165.042	166.049	86.12		86.12				0.29		Negative	2	11401		42132	6	Find by Molecular Feature											100
TRUE	14	PB cooked.d	DBSearch	3-Methylxanthine	C6 H6 N4 O2			1.621	165.042	166.049	87.43		87.43				-0.53		Negative	2	6838		34449	6	Find by Molecular Feature											92.9
TRUE	114	PB cooked.d	DBSearch	2,6-Dihydroxyphenylacetate	C8 H8 O4			8.224	167.035	168.043	77.65		77.65				-1.8		Negative	2	8919		61503	10	Find by Molecular Feature											100
TRUE	92	SW cooked.d	DBSearch	5(6)-Pentyl-1,4-dioxan-2-one	C9 H16 O3			8.857	171.103	172.11	86.28		86.28				-1.73		Negative	2	15055		190922	10	Find by Molecular Feature											100
TRUE	90	BW cooked rpt.d						7.699	172.099	173.106									Negative	2	9010		93680		Find by Molecular Feature											100
TRUE	116	PW cooked.d						7.715	172.099	173.106									Negative	2	8066		75862		Find by Molecular Feature											100
TRUE	82	SW cooked.d	DBSearch	Diethyl succinate	C8 H14 O4			7.993	173.082	174.089	98.54		98.54				-0.57		Negative	3	31863		244258	10	Find by Molecular Feature											98.6
TRUE	18	PW cooked.d	DBSearch	D-Arginine	C6 H14 N4 O2			1.573	173.104	174.112	87.49		87.49				-0.23		Negative	2	10769		42585	3	Find by Molecular Feature											100
TRUE	18	SW cooked.d						1.568	173.106	174.113									Negative	2	19223		63004		Find by Molecular Feature											82.2
TRUE	99	PW cooked.d	DBSearch	(±)-Glycerol 1,2-diacetate	C7 H12 O5			7.185	175.062	176.069	98.41		98.41				-1.72		Negative	3	17296		153101	10	Find by Molecular Feature											100
TRUE	81	BW cooked rpt.d						7.181	175.062	176.07									Negative	3	19418		197961		Find by Molecular Feature											100
TRUE	65	SW cooked.d						7.172	175.062	176.07									Negative	3	25612		232386		Find by Molecular Feature											100
TRUE	95	PB cooked.d						7.174	175.063	176.07									Negative	3	31479		338903		Find by Molecular Feature											100
TRUE	20	BW cooked rpt.d	DBSearch	Theobromine	C7 H8 N4 O2			1.613	179.057	180.064	85.41		85.41				2.3		Negative	2	27458		142621	10	Find by Molecular Feature											100
TRUE	20	SW cooked.d	DBSearch	Paraxanthine	C7 H8 N4 O2			1.608	179.057	180.064	85.7		85.7				2.63		Negative	3	18194		85569	5	Find by Molecular Feature											100
TRUE	22	PW cooked.d	DBSearch	Paraxanthine	C7 H8 N4 O2			1.608	179.057	180.065	86		86				0.59		Negative	2	12570		52724	5	Find by Molecular Feature											94.6
TRUE	69	BW cooked rpt.d	DBSearch	5-(2-Methylpropyl)tetrahydro-2-oxo-3-furancarboxylic acid	C9 H14 O4			6.377	185.083	186.09	74.13		74.13				-4.68		Negative	2	14715		142426	10	Find by Molecular Feature											100
TRUE	95	BW cooked rpt.d	DBSearch	Nonate	C9 H16 O4			8.42	187.098	188.105	85.91		85.91				-2.55		Negative	2	26098		217799	10	Find by Molecular Feature											100
TRUE	88	SW cooked.d	DBSearch	(+/-)-Methyl 5-acetoxyhexanoate	C9 H16 O4			8.422	187.098	188.106	95.15		95.15				-4.38		Negative	3	131868		1140843	6	Find by Molecular Feature											98.4
TRUE	122	PW cooked.d	DBSearch	(+/-)-Methyl 5-acetoxyhexanoate	C9 H16 O4			8.427	187.099	188.106	94.65		94.65				-4.85		Negative	3	29390		253665	6	Find by Molecular Feature											98.5
TRUE	116	PB cooked.d						8.431	187.099	188.106									Negative	2	12977		124453		Find by Molecular Feature											97.9
TRUE	108	PB cooked.d						7.9	189.079	190.086									Negative	2	6216		48286		Find by Molecular Feature											100
TRUE	28	PB cooked.d						2.55	191.022	192.029									Negative	3	40922		912941		Find by Molecular Feature											90.6
TRUE	13	PB cooked.d	DBSearch	3,9-Dimethyluric acid	C7 H8 N4 O3			1.618	195.053	196.06	80.05		80.05				-1.49		Negative	2	6302		31968	10	Find by Molecular Feature											82.8
TRUE	91	PB cooked.d	DBSearch	D-Tryptophan	C11 H12 N2 O2			7.101	203.083	204.091	96.78		96.78				-3.96		Negative	5	28453		197805	8	Find by Molecular Feature											100
TRUE	63	SW cooked.d	DBSearch	D-Tryptophan	C11 H12 N2 O2			7.098	203.083	204.091	96.09		96.09				-4.35		Negative	7	172125		1572110	8	Find by Molecular Feature											100
TRUE	95	PW cooked.d						7.065	203.084	204.091									Negative	7	241269		3365622		Find by Molecular Feature											100
TRUE	78	BW cooked rpt.d						7.08	203.084	204.092									Negative	7	269989		3230505		Find by Molecular Feature											100
TRUE	97	SW cooked.d	DBSearch	12-oxo-10E-dodecenoic acid	C12 H20 O3			9.185	211.135	212.142	84.75		84.75				-3.23		Negative	2	12358		184613	10	Find by Molecular Feature											100
TRUE	104	BW cooked rpt.d	DBSearch	12-oxo-10E-dodecenoic acid	C12 H20 O3			9.184	211.135	212.142	96.25		96.25				-2.92		Negative	3	10142		147640	10	Find by Molecular Feature											100
TRUE	128	PW cooked.d						9.188	211.135	212.143									Negative	2	8944		115203		Find by Molecular Feature											100
TRUE	17	SW cooked.d						1.564	215.009	216.017									Negative	3	13277		59824		Find by Molecular Feature											93.7
TRUE	112	PB cooked.d	DBSearch	3-hydroxy-sebacic acid	C10 H18 O5			8.072	217.109	218.116	83.02		83.02				-1.6		Negative	2	5129		37895	10	Find by Molecular Feature											93.5
TRUE	84	SW cooked.d	DBSearch	3-hydroxy-sebacic acid	C10 H18 O5			8.075	217.109	218.116	77.6		77.6				-3.99		Negative	2	12806		98270	10	Find by Molecular Feature											100
TRUE	55	PB cooked.d	DBSearch	Valyl-Threonine	C9 H18 N2 O4			5.744	217.119	218.126	81.38		81.38				0.75		Negative	2	6758		59036	9	Find by Molecular Feature											100
TRUE	63	BW cooked rpt.d	DBSearch	D-Pantothenic acid	C9 H17 N O5			6.192	218.104	219.111	97.48		97.48				-3.01		Negative	6	62717		914850	10	Find by Molecular Feature											100
TRUE	74	PW cooked.d	DBSearch	cis-Zeatin	C10 H13 N5 O			6.207	218.105	219.112	97.08		97.08				0.79		Negative	6	39910		439090	2	Find by Molecular Feature											100
TRUE	55	SW cooked.d	DBSearch	cis-Zeatin	C10 H13 N5 O			6.203	218.105	219.112	96.66		96.66				0.86		Negative	6	49905		570952	2	Find by Molecular Feature											100
TRUE	69	PB cooked.d	DBSearch	trans-Zeatin	C10 H13 N5 O			6.204	218.105	219.112	84.97		84.97				-1.85		Negative	2	11139		108472	2	Find by Molecular Feature											100
TRUE	25	SW cooked.d	DBSearch	Ethyl glucuronide	C8 H14 O7			1.619	221.067	222.075	83.29		83.29				-2.99		Negative	2	16700		61326	10	Find by Molecular Feature											99.6
TRUE	23	BW cooked rpt.d	DBSearch	(-)-1-Methylpropyl 1-propenyl disulfide	C7 H14 S2			1.632	221.068	162.054	79.49		79.49				-4.3		Negative	3	18026		102680	1	Find by Molecular Feature											98.3
TRUE	15	PB cooked.d						1.625	221.069	222.076									Negative	2	9122		34773		Find by Molecular Feature											100
TRUE	81	PB cooked.d	DBSearch	Carbidopa	C10 H14 N2 O4			6.763	225.089	226.095	70.98		70.98				-0.68		Negative	3	7553		71844	8	Find by Molecular Feature											80
TRUE	6	PW cooked.d						1.445	226.966	227.974									Negative	3	8308		48022		Find by Molecular Feature											94.7
TRUE	7	PB cooked.d						1.465	226.966	227.974									Negative	3	8814		60416		Find by Molecular Feature											81.8
TRUE	74	PB cooked.d						6.366	232.087	233.094									Negative	2	5915		69859		Find by Molecular Feature											100
TRUE	108	PW cooked.d						7.421	239.058	240.065									Negative	2	10134		76461		Find by Molecular Feature											100
TRUE	89	SW cooked.d	DBSearch	Neocnidilide	C12 H18 O2			8.501	239.13	194.131	91.75		91.75				-3.03		Negative	4	10081		90434	10	Find by Molecular Feature											96.4
TRUE	62	BW cooked rpt.d	DBSearch	HC Yellow No. 4	C10 H14 N2 O5			6.176	241.083	242.091	96.64		96.64				-1.28		Negative	3	12345		136835	5	Find by Molecular Feature											100
TRUE	67	PB cooked.d	DBSearch	HC Yellow No. 4	C10 H14 N2 O5			6.197	241.084	242.091	83.11		83.11				-3.82		Negative	2	11659		125372	7	Find by Molecular Feature											100
TRUE	52	SW cooked.d	DBSearch	Triethyl phosphate	C6 H15 O4 P			6.191	241.084	182.07	93.42		93.42				2.89		Negative	3	15442		157341	5	Find by Molecular Feature											100
TRUE	69	PW cooked.d	DBSearch	Triethyl phosphate	C6 H15 O4 P			6.196	241.084	182.07	87.76		87.76				2.11		Negative	3	16983		171830	2	Find by Molecular Feature											100
TRUE	4	BW cooked rpt.d						1.445	242.94	243.947									Negative	3	9267		42640		Find by Molecular Feature											94.7
TRUE	7	PW cooked.d						1.463	242.94	243.948									Negative	5	13152		91932		Find by Molecular Feature											93
TRUE	8	SW cooked.d						1.474	242.94	243.948									Negative	5	20928		134558		Find by Molecular Feature											100
TRUE	40	BW cooked rpt.d						2.974	243.064	244.071									Negative	2	10185		360547		Find by Molecular Feature											94.7
TRUE	36	PW cooked.d						2.98	243.064	244.071									Negative	2	6872		178260		Find by Molecular Feature											100
TRUE	32	PB cooked.d						2.979	243.064	244.071									Negative	2	6558		173078		Find by Molecular Feature											99.9
TRUE	91	SW cooked.d	DBSearch	Polyethylene, oxidized	C12 H20 O5			8.648	243.125	244.132	96.11		96.11				-2.81		Negative	4	30738		270744	10	Find by Molecular Feature											95.1
TRUE	85	SW cooked.d	DBSearch	Methyl 3-(2,3-dihydroxy-3-methylbutyl)-4-hydroxybenzoate	C13 H18 O5			8.082	253.109	254.116	91.46		91.46				-3		Negative	3	11849		162910	10	Find by Molecular Feature											88.8
TRUE	86	SW cooked.d	DBSearch	Triethylene glycol diglycidyl ether	C12 H22 O6			8.16	261.135	262.142	96.89		96.89				-1.1		Negative	3	13457		104905	10	Find by Molecular Feature											100
TRUE	44	SW cooked.d	DBSearch	Zidovudine	C10 H13 N5 O4			5.661	266.09	267.097	92.59		92.59				-0.11		Negative	6	10112		131158	8	Find by Molecular Feature											96.9
TRUE	53	PB cooked.d	DBSearch	Zidovudine	C10 H13 N5 O4			5.658	266.09	267.097	47.34		47.34				-1		Negative	2	10603		106316	8	Find by Molecular Feature											80
TRUE	56	PW cooked.d	DBSearch	Zidovudine	C10 H13 N5 O4			5.67	266.09	267.097	78.53		78.53				-2.04		Negative	4	15389		222973	7	Find by Molecular Feature											100
TRUE	45	PW cooked.d						5.197	267.075	268.082									Negative	2	8226		159667		Find by Molecular Feature											100
TRUE	42	PB cooked.d						5.181	267.075	268.082									Negative	6	31567		803700		Find by Molecular Feature											100
TRUE	3	PW cooked.d	DBSearch	2,4-Dichloro-3-oxoadipate	C6 H6 Cl2 O5			1.398	272.957	227.958	59.96		59.96				4.34		Negative	4	45786		414676	1	Find by Molecular Feature											100
TRUE	2	BW cooked rpt.d	DBSearch	Ribose-1-arsenate	C5 H11 As O8			1.396	272.959	273.964	32.62		32.62				10.85		Negative	4	18625		151935	1	Find by Molecular Feature											100
TRUE	3	PB cooked.d	DBSearch	Ribose-1-arsenate	C5 H11 As O8			1.404	272.959	273.964	38.06		38.06				9.12		Negative	4	71927		755800	1	Find by Molecular Feature											100
TRUE	3	SW cooked.d	DBSearch	Ribose-1-arsenate	C5 H11 As O8			1.401	272.96	273.965	44.78		44.78				7.05		Negative	4	105664		1046896	1	Find by Molecular Feature											100
TRUE	1	PW cooked.d	DBSearch	delta-3,4,5,6-Tetrachlorocyclohexene	C6 H6 Cl4			1.372	276.936	217.92	38.57		38.57				9.47		Negative	3	8878		90687		Find by Molecular Feature											100
TRUE	1	PB cooked.d						1.367	276.94	277.947									Negative	2	6334		56519		Find by Molecular Feature											100
TRUE	39	BW cooked rpt.d						2.944	279.041	280.048									Negative	3	10626		446325		Find by Molecular Feature											100
TRUE	31	PB cooked.d						2.96	279.041	280.048									Negative	3	6206		200086		Find by Molecular Feature											100
TRUE	150	PW cooked.d	DBSearch	Linalyl caprylate	C18 H32 O2			13.695	279.234	280.241	94.74		94.74				-4.07		Negative	6	29167		616326	10	Find by Molecular Feature											100
TRUE	117	SW cooked.d						13.689	279.235	280.241									Negative	7	61358		1320303		Find by Molecular Feature											100
TRUE	149	PB cooked.d						13.68	279.235	280.242									Negative	6	9847		158225		Find by Molecular Feature											100
TRUE	129	BW cooked rpt.d						13.696	279.235	280.242									Negative	7	48115		1106687		Find by Molecular Feature											100
TRUE	11	PW cooked.d						1.498	280.909	281.916									Negative	3	7256		44500		Find by Molecular Feature											100
TRUE	6	BW cooked rpt.d						1.494	280.909	281.916									Negative	3	7983		61686		Find by Molecular Feature											100
TRUE	37	SW cooked.d	DBSearch	Isoguanosine	C10 H13 N5 O5			5.109	282.085	283.093	96.41		96.41				-3.47		Negative	3	38762		811148	9	Find by Molecular Feature											100
TRUE	46	BW cooked rpt.d	DBSearch	Isoguanosine	C10 H13 N5 O5			5.086	282.086	283.093	94.01		94.01				-4.35		Negative	6	48022		1629539	9	Find by Molecular Feature											100
TRUE	44	PW cooked.d	DBSearch	Isoguanosine	C10 H13 N5 O5			5.118	282.086	283.093	94.96		94.96				-4.17		Negative	6	75441		1979565	9	Find by Molecular Feature											100
TRUE	38	PB cooked.d	DBSearch	Guanosine	C10 H13 N5 O5			5.089	282.086	283.093	93.33		93.33				-4.89		Negative	6	65970		1672498	2	Find by Molecular Feature											100
TRUE	61	PB cooked.d						6.032	283.07	284.078									Negative	2	7545		56520		Find by Molecular Feature											100
TRUE	124	PW cooked.d	DBSearch	Luteolin	C15 H10 O6			8.972	285.041	286.048	94.93		94.93				-2.62		Negative	3	12466		126748	10	Find by Molecular Feature											98.5
TRUE	123	PB cooked.d	DBSearch	Luteolin	C15 H10 O6			8.983	285.042	286.049	92.67		92.67				-4.96		Negative	6	39866		651970	10	Find by Molecular Feature											100
TRUE	102	PB cooked.d						7.496	289.073	290.08									Negative	4	63500		681025		Find by Molecular Feature											100
TRUE	92	PB cooked.d	DBSearch	Dibutyl malate	C12 H22 O5			7.122	291.146	246.147	74.47		74.47				-1.9		Negative	2	7603		53352	3	Find by Molecular Feature											100
TRUE	102	PW cooked.d	DBSearch	Ethyl (S)-3-hydroxybutyrate glucoside	C12 H22 O8			7.227	293.125	294.132	97.95		97.95				-2.45		Negative	7	57775		811644	3	Find by Molecular Feature											100
TRUE	67	SW cooked.d	DBSearch	Histidylproline diketopiperazine	C12 H16 N4 O2			7.23	293.125	248.127	96.63		96.63				0.76		Negative	7	47546		598892	3	Find by Molecular Feature											100
TRUE	83	BW cooked rpt.d	DBSearch	Histidylproline diketopiperazine	C12 H16 N4 O2			7.216	293.125	248.127	98.44		98.44				0.39		Negative	5	29087		399826	3	Find by Molecular Feature											100
TRUE	144	PW cooked.d	DBSearch	10-Oxo-11-octadecen-13-olide	C18 H30 O3			11.087	293.214	294.221	74.76		74.76				-5.19		Negative	2	7650		106150	10	Find by Molecular Feature											100
TRUE	125	BW cooked rpt.d						11.975	293.214	294.221									Negative	2	9579		213510		Find by Molecular Feature											100
TRUE	47	BW cooked rpt.d	DBSearch	Didanosine	C10 H12 N4 O3			5.571	295.104	236.09	95.69		95.69				3.94		Negative	3	13976		244536	1	Find by Molecular Feature											100
TRUE	45	PB cooked.d	DBSearch	Didanosine	C10 H12 N4 O3			5.575	295.104	236.09	83.84		83.84				5.64		Negative	3	7735		130327	1	Find by Molecular Feature											100
TRUE	39	SW cooked.d	DBSearch	Didanosine	C10 H12 N4 O3			5.58	295.104	236.09	97.43		97.43				2.33		Negative	4	20872		299688	1	Find by Molecular Feature											100
TRUE	49	PW cooked.d	DBSearch	Didanosine	C10 H12 N4 O3			5.587	295.104	236.09	96.65		96.65				1.97		Negative	6	56384		965212	1	Find by Molecular Feature											100
TRUE	115	SW cooked.d						11.5	295.23	296.237									Negative	7	90452		2221222		Find by Molecular Feature											100
TRUE	123	BW cooked rpt.d						11.5	295.23	296.237									Negative	8	46407		1100160		Find by Molecular Feature											100
TRUE	147	PW cooked.d						11.503	295.23	296.237									Negative	8	51013		1276522		Find by Molecular Feature											100
TRUE	145	PB cooked.d						11.516	295.23	296.237									Negative	8	58412		1643818		Find by Molecular Feature											100
TRUE	15	PW cooked.d	DBSearch	gamma-Pentachlorocyclohexene	C6 H5 Cl5			1.503	296.882	251.884	66.59		66.59				-3.08		Negative	3	17042		106274	1	Find by Molecular Feature											100
TRUE	14	BW cooked rpt.d	DBSearch	gamma-Pentachlorocyclohexene	C6 H5 Cl5			1.505	296.882	251.885	64.88		64.88				-4.38		Negative	5	23878		182845	1	Find by Molecular Feature											100
TRUE	14	SW cooked.d	DBSearch	gamma-Pentachlorocyclohexene	C6 H5 Cl5			1.519	296.883	251.885	66.41		66.41				-4.36		Negative	3	20498		134678	1	Find by Molecular Feature											100
TRUE	10	PB cooked.d						1.524	296.883	297.89									Negative	3	8337		52651		Find by Molecular Feature											85.1
TRUE	130	PW cooked.d	DBSearch	Isokaempferide	C16 H12 O6			9.402	299.057	300.064	90.99		90.99				-3.28		Negative	5	21022		266891	10	Find by Molecular Feature											99.8
TRUE	128	PB cooked.d	DBSearch	Tectorigenin	C16 H12 O6			9.409	299.057	300.065	94.61		94.61				-4.16		Negative	7	63758		1053751	10	Find by Molecular Feature											100
TRUE	48	BW cooked rpt.d	DBSearch	Phenylglucoside	C12 H16 O6			5.573	301.093	256.095	98.64		98.64				-1.28		Negative	6	30039		677058	6	Find by Molecular Feature											100
TRUE	48	PB cooked.d	DBSearch	Aryl beta-D-glucoside	C12 H16 O6			5.61	301.093	256.095	92.35		92.35				0.03		Negative	5	27219		411039	6	Find by Molecular Feature											100
TRUE	57	BW cooked rpt.d						5.93	301.094	302.101									Negative	7	18101		326745		Find by Molecular Feature											100
TRUE	52	PW cooked.d	DBSearch	Lumichrome	C12 H10 N4 O2			5.618	301.094	242.08	92.47		92.47				3.38		Negative	3	32213		486474	6	Find by Molecular Feature											100
TRUE	47	SW cooked.d	DBSearch	Lumichrome	C12 H10 N4 O2			5.946	301.094	242.08	97.39		97.39				2.25		Negative	5	17766		238646	6	Find by Molecular Feature											100
TRUE	42	SW cooked.d	DBSearch	Lumichrome	C12 H10 N4 O2			5.612	301.094	242.08	96.29		96.29				2.78		Negative	5	28195		491248	6	Find by Molecular Feature											100
TRUE	61	PW cooked.d	DBSearch	Lumichrome	C12 H10 N4 O2			5.954	301.094	242.08	99.04		99.04				0.68		Negative	5	21312		279868	6	Find by Molecular Feature											100
TRUE	60	PB cooked.d	DBSearch	Lumichrome	C12 H10 N4 O2			5.946	301.094	242.081	95.71		95.71				-0.9		Negative	3	10948		125054	1	Find by Molecular Feature											100
TRUE	42	BW cooked rpt.d	DBSearch	N-Benzoyl-4-hydroxyanthranilate	C14 H11 N O4			4.363	302.067	257.067	51.4		51.4				6.68		Negative	3	14588		504935	3	Find by Molecular Feature											100
TRUE	39	PW cooked.d	DBSearch	N-Benzoyl-4-hydroxyanthranilate	C14 H11 N O4			4.425	302.067	257.067	50.93		50.93				6.37		Negative	3	20013		465885	3	Find by Molecular Feature											100
TRUE	35	SW cooked.d	DBSearch	N-Benzoyl-4-hydroxyanthranilate	C14 H11 N O4			4.442	302.067	257.067	52.6		52.6				6.26		Negative	3	13497		284845	3	Find by Molecular Feature											100
TRUE	34	PB cooked.d	DBSearch	N-Benzoyl-4-hydroxyanthranilate	C14 H11 N O4			4.402	302.068	257.067	54.37		54.37				5.18		Negative	4	24321		550521	3	Find by Molecular Feature											100
TRUE	83	PB cooked.d						6.832	305.069	306.076									Negative	2	5501		40560		Find by Molecular Feature											100
TRUE	79	SW cooked.d	DBSearch	Triethylene glycol diglycidyl ether	C12 H22 O6			7.756	307.14	262.142	98.68		98.68				-1.57		Negative	5	21869		229127	3	Find by Molecular Feature											100
TRUE	107	PB cooked.d	DBSearch	Histidylproline diketopiperazine	C12 H16 N4 O2			7.745	307.14	248.127	94.5		94.5				3.02		Negative	3	6774		75759	3	Find by Molecular Feature											100
TRUE	92	BW cooked rpt.d	DBSearch	Histidylproline diketopiperazine	C12 H16 N4 O2			7.763	307.141	248.127	97.14		97.14				1.62		Negative	3	9353		103107	3	Find by Molecular Feature											100
TRUE	117	PW cooked.d	DBSearch	Histidylproline diketopiperazine	C12 H16 N4 O2			7.762	307.141	248.127	96.77		96.77				1.26		Negative	5	16949		187654	3	Find by Molecular Feature											100
TRUE	58	PW cooked.d						5.749	309.117	310.124									Negative	3	8944		159258		Find by Molecular Feature											100
TRUE	56	BW cooked rpt.d	DBSearch	(Z)-2-Methyl-2-butene-1,4-diol 4-O-beta-D-Glucopyranoside	C11 H20 O7			5.75	309.12	264.122	92.78		92.78				-2.55		Negative	3	8958		104198	2	Find by Molecular Feature											100
TRUE	103	SW cooked.d	DBSearch	9(S)-HpOTrE	C18 H30 O4			10.241	309.208	310.215	82.92		82.92				-2.43		Negative	2	10893		102342	10	Find by Molecular Feature											85
TRUE	101	SW cooked.d	DBSearch	9(S)-HpOTrE	C18 H30 O4			9.955	309.208	310.215	82.99		82.99				-2.55		Negative	2	12359		115622	10	Find by Molecular Feature											100
TRUE	110	BW cooked rpt.d	DBSearch	9(S)-HpOTrE	C18 H30 O4			9.95	309.208	310.216	77.31		77.31				-4.11		Negative	2	8468		74052	10	Find by Molecular Feature											100
TRUE	134	PW cooked.d	DBSearch	9(S)-HpOTrE	C18 H30 O4			9.957	309.208	310.215	69.36		69.36				-3.29		Negative	3	10214		134925	10	Find by Molecular Feature											84.3
TRUE	133	PB cooked.d	DBSearch	9(S)-HpOTrE	C18 H30 O4			10.216	309.208	310.216	79.54		79.54				-3.42		Negative	2	8248		124875	10	Find by Molecular Feature											100
TRUE	140	PB cooked.d	DBSearch	9(S)-HpOTrE	C18 H30 O4			10.746	309.208	310.216	78.69		78.69				-3.86		Negative	2	5290		68407	10	Find by Molecular Feature											100
TRUE	115	BW cooked rpt.d	DBSearch	9Z-Octadecenedioic acid	C18 H32 O4			10.531	311.224	312.231	81.93		81.93				-2.98		Negative	4	16557		161674	10	Find by Molecular Feature											100
TRUE	135	PW cooked.d	DBSearch	9Z-Octadecenedioic acid	C18 H32 O4			10.137	311.224	312.231	82.32		82.32				-3.25		Negative	2	27448		367242	10	Find by Molecular Feature											100
TRUE	145	PW cooked.d	DBSearch	9Z-Octadecenedioic acid	C18 H32 O4			11.173	311.224	312.231	83.99		83.99				-4.64		Negative	6	24765		384424	10	Find by Molecular Feature											99.7
TRUE	102	SW cooked.d	DBSearch	9Z-Octadecenedioic acid	C18 H32 O4			10.125	311.224	312.231	93.13		93.13				-4.11		Negative	3	41581		558293	10	Find by Molecular Feature											91.9
TRUE	106	SW cooked.d	DBSearch	9Z-Octadecenedioic acid	C18 H32 O4			10.536	311.224	312.231	80.62		80.62				-3.47		Negative	4	33692		364693	10	Find by Molecular Feature											98.5
TRUE	111	BW cooked rpt.d	DBSearch	7S,8S-DiHODE	C18 H32 O4			10.116	311.224	312.231	78.41		78.41				-4.57		Negative	4	25421		332088	10	Find by Molecular Feature											100
TRUE	118	BW cooked rpt.d	DBSearch	11S-HpODE	C18 H32 O4			10.711	311.224	312.231	78.97		78.97				-4.55		Negative	6	12540		146784	8	Find by Molecular Feature											100
TRUE	108	SW cooked.d	DBSearch	11S-HpODE	C18 H32 O4			10.715	311.224	312.231	78.91		78.91				-4.67		Negative	4	21124		232530	8	Find by Molecular Feature											82.7
TRUE	132	PB cooked.d	DBSearch	11S-HpODE	C18 H32 O4			10.124	311.224	312.231	92.49		92.49				-4.56		Negative	3	35068		458572	8	Find by Molecular Feature											100
TRUE	137	PB cooked.d						10.495	311.224	312.232									Negative	2	34724		450999		Find by Molecular Feature											89.7
TRUE	143	PB cooked.d						11.178	311.224	312.231									Negative	6	33620		634912		Find by Molecular Feature											100
TRUE	121	BW cooked rpt.d						11.159	311.224	312.232									Negative	5	13435		179842		Find by Molecular Feature											87.7
TRUE	112	SW cooked.d						11.165	311.224	312.232									Negative	5	21847		287088		Find by Molecular Feature											100
TRUE	110	SW cooked.d						11.013	311.225	312.232									Negative	6	27938		269498		Find by Molecular Feature											80.4
TRUE	35	PB cooked.d	DBSearch	Adenosine	C10 H13 N5 O4			4.42	312.096	267.097	88.54		88.54				-0.33		Negative	3	7721		160664	10	Find by Molecular Feature											96.3
TRUE	41	PW cooked.d	DBSearch	Adenosine	C10 H13 N5 O4			4.44	312.096	267.098	93.85		93.85				-4.04		Negative	3	10002		212144	10	Find by Molecular Feature											80
TRUE	44	BW cooked rpt.d	DBSearch	Adenosine	C10 H13 N5 O4			4.391	312.096	267.098	95.55		95.55				-3.93		Negative	3	7801		244620	10	Find by Molecular Feature											100
TRUE	62	SW cooked.d	DBSearch	Disperse Blue 1	C14 H12 N4 O2			7.097	313.094	268.096	95.49		95.49				1.34		Negative	3	15108		114661	7	Find by Molecular Feature											100
TRUE	79	BW cooked rpt.d	DBSearch	Disperse Blue 1	C14 H12 N4 O2			7.1	313.095	268.097	91.83		91.83				-2.6		Negative	3	8052		69999	1	Find by Molecular Feature											100
TRUE	113	BW cooked rpt.d	DBSearch	9,10-DiHOME	C18 H34 O4			10.392	313.24	314.247	92.96		92.96				-4.72		Negative	7	75145		1162441	6	Find by Molecular Feature											100
TRUE	104	SW cooked.d						10.393	313.24	314.247									Negative	8	158750		2547435		Find by Molecular Feature											97
TRUE	134	PB cooked.d						10.396	313.24	314.247									Negative	8	152588		2507624		Find by Molecular Feature											89.7
TRUE	138	PW cooked.d						10.395	313.24	314.247									Negative	8	84578		1297757		Find by Molecular Feature											96
TRUE	36	PB cooked.d	DBSearch	Tolcapone	C14 H11 N O5			5.074	318.062	273.064	82.87		82.87				-0.63		Negative	2	5624		118229	2	Find by Molecular Feature											100
TRUE	74	BW cooked rpt.d	DBSearch	Dikegulac	C12 H18 O7			6.885	319.104	274.106	95.41		95.41				-2.22		Negative	3	14377		112624	2	Find by Molecular Feature											100
TRUE	91	PW cooked.d	DBSearch	Dikegulac	C12 H18 O7			6.895	319.104	274.106	93.57		93.57				-2.91		Negative	3	14971		112322	2	Find by Molecular Feature											100
TRUE	85	PB cooked.d	DBSearch	Dikegulac	C12 H18 O7			6.895	319.105	274.106	79.24		79.24				-4.59		Negative	2	13727		102303	2	Find by Molecular Feature											100
TRUE	98	PW cooked.d	DBSearch	(Z)-2-Methyl-2-butene-1,4-diol 4-O-beta-D-Glucopyranoside	C11 H20 O7			7.16	323.135	264.122	98.22		98.22				-2.36		Negative	6	38047		344080	4	Find by Molecular Feature											100
TRUE	73	BW cooked rpt.d	DBSearch	(Z)-2-Methyl-2-butene-1,4-diol 4-O-beta-D-Glucopyranoside	C11 H20 O7			6.817	323.136	264.122	97.39		97.39				-2.91		Negative	7	54660		543841	4	Find by Molecular Feature											100
TRUE	89	PW cooked.d	DBSearch	(Z)-2-Methyl-2-butene-1,4-diol 4-O-beta-D-Glucopyranoside	C11 H20 O7			6.821	323.136	264.122	97.48		97.48				-2.78		Negative	7	49609		475317	4	Find by Molecular Feature											100
TRUE	60	SW cooked.d	DBSearch	Pentoxifylline	C13 H18 N4 O3			6.82	323.136	278.137	96.71		96.71				1.57		Negative	7	83079		862048	4	Find by Molecular Feature											100
TRUE	80	BW cooked rpt.d	DBSearch	Pentoxifylline	C13 H18 N4 O3			7.155	323.136	278.138	97.7		97.7				0.77		Negative	5	29934		261706	4	Find by Molecular Feature											100
TRUE	64	SW cooked.d	DBSearch	Pentoxifylline	C13 H18 N4 O3			7.155	323.136	278.138	97.58		97.58				0.47		Negative	6	51316		483545	4	Find by Molecular Feature											100
TRUE	82	PB cooked.d	DBSearch	N-Benzoyl-D-arginine	C13 H18 N4 O3			6.817	323.136	278.138	91.62		91.62				-0.54		Negative	3	10865		82697	2	Find by Molecular Feature											100
TRUE	93	PB cooked.d	DBSearch	N-Benzoyl-D-arginine	C13 H18 N4 O3			7.153	323.136	278.138	96.76		96.76				-0.52		Negative	6	34973		301729	2	Find by Molecular Feature											100
TRUE	47	PW cooked.d	DBSearch	1,5-Dihydroxy-3-methoxy-2-prenylxanthone	C19 H18 O5			5.575	325.108	326.116	78.65		78.65				-0.48		Negative	2	7357		201637	10	Find by Molecular Feature											97.9
TRUE	8	PW cooked.d						1.464	326.901	327.909									Negative	5	10791		74719		Find by Molecular Feature											89.3
TRUE	9	SW cooked.d						1.478	326.901	327.909									Negative	5	17141		113191		Find by Molecular Feature											100
TRUE	100	SW cooked.d	DBSearch	Corchorifatty acid F	C18 H32 O5			9.724	327.218	328.226	83.36		83.36				-2.19		Negative	5	28928		447852	5	Find by Molecular Feature											80
TRUE	133	PW cooked.d	DBSearch	Corchorifatty acid F	C18 H32 O5			9.745	327.219	328.226	80.05		80.05				-2.41		Negative	4	9264		115260	5	Find by Molecular Feature											89.2
TRUE	125	PW cooked.d	DBSearch	Corchorifatty acid F	C18 H32 O5			9.007	327.219	328.226	82.42		82.42				-2.91		Negative	6	150367		2073932	5	Find by Molecular Feature											100
TRUE	99	SW cooked.d	DBSearch	Corchorifatty acid F	C18 H32 O5			9.587	327.219	328.226	81.52		81.52				-3.29		Negative	5	27021		512847	5	Find by Molecular Feature											87
TRUE	124	PB cooked.d	DBSearch	Corchorifatty acid F	C18 H32 O5			9.008	327.219	328.226	79.97		79.97				-3.54		Negative	5	39227		409833	5	Find by Molecular Feature											100
TRUE	106	BW cooked rpt.d	DBSearch	Corchorifatty acid F	C18 H32 O5			9.354	327.219	328.226	78.87		78.87				-2.86		Negative	2	7356		66496	5	Find by Molecular Feature											85.9
TRUE	130	PB cooked.d	DBSearch	Corchorifatty acid F	C18 H32 O5			9.756	327.219	328.226	81.47		81.47				-3.29		Negative	6	43414		870105	5	Find by Molecular Feature											100
TRUE	101	BW cooked rpt.d	DBSearch	Corchorifatty acid F	C18 H32 O5			9.004	327.219	328.226	95.18		95.18				-3.62		Negative	8	164381		2257854	5	Find by Molecular Feature											100
TRUE	94	SW cooked.d	DBSearch	Auxin a	C18 H32 O5			9.004	327.219	328.226	92.91		92.91				-4.37		Negative	7	265444		3980416	4	Find by Molecular Feature											100
TRUE	100	PW cooked.d	DBSearch	Lithospermoside	C14 H19 N O8			7.188	328.105	329.111	80.03		80.03				0.72		Negative	3	7032		73431	3	Find by Molecular Feature											100
TRUE	42	PW cooked.d	DBSearch	3'-Glucosyl-2',4',6'-trihydroxyacetophenone	C14 H18 O9			4.935	329.088	330.096	93.06		93.06				-1.58		Negative	4	7806		125285	4	Find by Molecular Feature											100
TRUE	73	PB cooked.d	DBSearch	3'-Glucosyl-2',4',6'-trihydroxyacetophenone	C14 H18 O9			6.343	329.089	330.097	87.33		87.33				-4.55		Negative	4	9832		87356	1	Find by Molecular Feature											100
TRUE	109	BW cooked rpt.d	DBSearch	9S,12S,13S-trihydroxy-10E-octadecenoic acid	C18 H34 O5			9.576	329.235	330.242	93.93		93.93				-4.16		Negative	5	76068		1282372	3	Find by Molecular Feature											100
TRUE	98	SW cooked.d	DBSearch	9S,12S,13S-trihydroxy-10E-octadecenoic acid	C18 H34 O5			9.574	329.235	330.242	77.45		77.45				-4.57		Negative	6	108815		2539044	3	Find by Molecular Feature											98.7
TRUE	96	SW cooked.d	DBSearch	9S,12S,13S-trihydroxy-10E-octadecenoic acid	C18 H34 O5			9.184	329.235	330.242	91.56		91.56				-4.61		Negative	10	398218		18246900	3	Find by Molecular Feature											100
TRUE	103	BW cooked rpt.d						9.184	329.235	330.242									Negative	8	292659		11700692		Find by Molecular Feature											100
TRUE	129	PW cooked.d						9.189	329.235	330.242									Negative	9	249528		9035022		Find by Molecular Feature											100
TRUE	131	PW cooked.d						9.566	329.235	330.242									Negative	4	64892		677889		Find by Molecular Feature											83
TRUE	129	PB cooked.d						9.584	329.235	330.242									Negative	5	51899		810978		Find by Molecular Feature											93.7
TRUE	126	PB cooked.d						9.189	329.235	330.242									Negative	9	176891		5450912		Find by Molecular Feature											100
TRUE	126	PW cooked.d	DBSearch	Phloionolic acid	C18 H36 O5			9.023	331.249	332.257	81.87		81.87				-0.66		Negative	2	6427		35567	6	Find by Molecular Feature											80.5
TRUE	80	PW cooked.d						6.413	335.102	336.11									Negative	2	7256		75146		Find by Molecular Feature											100
TRUE	49	PB cooked.d	DBSearch	6-(2-Amino-2-carboxyethyl)-7,8-dioxo-1,2,3,4,7,8-hexahydroquinoline-2,4-dicarboxylate	C14 H14 N2 O8			5.621	337.069	338.075	62.03		62.03				0.73		Negative	4	18339		408912	1	Find by Molecular Feature											100
TRUE	50	BW cooked rpt.d						5.608	337.07	338.077									Negative	4	23113		792538		Find by Molecular Feature											100
TRUE	43	SW cooked.d						5.624	337.07	338.077									Negative	4	14437		395247		Find by Molecular Feature											100
TRUE	53	PW cooked.d	DBSearch	7-O-Methylsterigmatocystin	C19 H14 O6			5.637	337.07	338.077	71.38		71.38				4.73		Negative	2	16818		331683	3	Find by Molecular Feature											100
TRUE	83	PW cooked.d						6.554	341.09	342.097									Negative	2	7136		86251		Find by Molecular Feature											84.2
TRUE	88	PW cooked.d						6.742	341.092	342.1									Negative	2	13482		131431		Find by Molecular Feature											100
TRUE	20	PW cooked.d	DBSearch	Galactinol (1-α-d-galactosyl-myo-inositol)	C12 H22 O11			1.58	341.11	342.117	97.63		97.63				-1.47		Negative	4	27022		195712	10	Find by Molecular Feature											93.4
TRUE	22	SW cooked.d	DBSearch	8-Oxocoformycin	C11 H14 N4 O5			1.612	341.11	282.096	83.47		83.47				1.12		Negative	2	37677		175999	10	Find by Molecular Feature											100
TRUE	106	PW cooked.d	DBSearch	DIBOA-Glc	C14 H17 N O9			7.396	342.084	343.092	94.84		94.84				-3.71		Negative	7	56131		1077265	4	Find by Molecular Feature											100
TRUE	69	SW cooked.d	DBSearch	L-Menthone 1,2-glycerol ketal	C16 H15 N3 O S			7.389	342.092	297.094	89.04		89.04				-2.4		Negative	5	13011		132370	1	Find by Molecular Feature											100
TRUE	142	PB cooked.d	DBSearch	12R-hydroxy-9Z-octadecenoic acid	C18 H34 O3			10.966	343.249	298.251	98.22		98.22				0.05		Negative	6	9585		147886	10	Find by Molecular Feature											100
TRUE	120	BW cooked rpt.d	DBSearch	12R-hydroxy-9Z-octadecenoic acid	C18 H34 O3			10.958	343.25	298.252	92.6		92.6				-2.46		Negative	6	8976		151542	10	Find by Molecular Feature											100
TRUE	143	PW cooked.d	DBSearch	12R-hydroxy-9Z-octadecenoic acid	C18 H34 O3			10.964	343.25	298.252	96		96				-2.67		Negative	5	7576		123343	10	Find by Molecular Feature											100
TRUE	43	PB cooked.d	DBSearch	cGMP / Guanosine 3',5'-cyclic monophosphate	C10 H12 N5 O7 P			5.395	344.039	345.046	40.42		40.42				4.61		Negative	3	20923		394336	4	Find by Molecular Feature											87
TRUE	47	PB cooked.d	DBSearch	Glucosylisomaltol	C12 H16 O8			5.609	347.098	288.085	99.39		99.39				-0.26		Negative	4	47228		753712	2	Find by Molecular Feature											100
TRUE	49	BW cooked rpt.d	DBSearch	Glucosylisomaltol	C12 H16 O8			5.578	347.099	288.085	99.72		99.72				-0.75		Negative	3	61438		1484105	2	Find by Molecular Feature											100
TRUE	51	PW cooked.d	DBSearch	Glucosylisomaltol	C12 H16 O8			5.617	347.099	288.085	99.3		99.3				-1.44		Negative	3	62013		1065937	2	Find by Molecular Feature											100
TRUE	41	SW cooked.d	DBSearch	Glucosylisomaltol	C12 H16 O8			5.609	347.099	288.085	99.12		99.12				-1.36		Negative	4	62374		1063756	2	Find by Molecular Feature											100
TRUE	111	PW cooked.d	DBSearch	Furaneol 4-glucoside	C12 H18 O8			7.505	349.115	290.101	79.1		79.1				-3.48		Negative	2	7046		55988	2	Find by Molecular Feature											100
TRUE	73	SW cooked.d	DBSearch	Furaneol 4-glucoside	C12 H18 O8			7.496	349.115	290.101	79.89		79.89				-3.73		Negative	5	13363		131295	2	Find by Molecular Feature											80
TRUE	76	SW cooked.d	DBSearch	Pantoyllactone glucoside	C12 H20 O8			7.65	351.13	292.116	99.53		99.53				-0.31		Negative	3	25555		261618	1	Find by Molecular Feature											100
TRUE	113	PW cooked.d						7.656	351.131	352.138									Negative	5	22171		260782		Find by Molecular Feature											100
TRUE	88	BW cooked rpt.d						7.641	351.131	352.139									Negative	5	21622		239916		Find by Molecular Feature											100
TRUE	87	PB cooked.d						6.974	355.069	356.077									Negative	3	7086		58852		Find by Molecular Feature											100
TRUE	84	PW cooked.d	DBSearch	Dantrolene	C14 H10 N4 O5			6.617	359.063	314.065	96.61		96.61				-0.48		Negative	4	30606		713930	2	Find by Molecular Feature											90.5
TRUE	76	BW cooked rpt.d	DBSearch	Tetrahydropentoxyline	C17 H22 N2 O7			7.033	365.135	366.143	98.91		98.91				-0.25		Negative	7	14447		303898	5	Find by Molecular Feature											100
TRUE	119	PW cooked.d	DBSearch	Niazirinin	C16 H19 N O6			7.872	366.12	321.121	68.34		68.34				1.64		Negative	5	10092		100198	1	Find by Molecular Feature											100
TRUE	126	BW cooked rpt.d						12.115	366.267	367.274									Negative	4	8502		166707		Find by Molecular Feature											100
TRUE	150	PB cooked.d	DBSearch	1,1'-[1,13-Tridecanediylbis(oxy)]bisbenzene	C25 H36 O2			14.551	367.265	368.273	91.09		91.09				-3.54		Negative	3	5437		73513	3	Find by Molecular Feature											100
TRUE	148	PB cooked.d	DBSearch	Linoleoyl Ethanolamide	C20 H37 N O2			12.361	368.282	323.283	96.03		96.03				-2.81		Negative	3	5534		74952	2	Find by Molecular Feature											91.8
TRUE	93	BW cooked rpt.d	DBSearch	Dihydroferulic acid 4-O-glucuronide	C16 H20 O10			7.86	371.1	372.107	73.34		73.34				-4.69		Negative	3	7428		58779	10	Find by Molecular Feature											97.3
TRUE	118	PW cooked.d	DBSearch	Dihydroferulic acid 4-O-glucuronide	C16 H20 O10			7.872	371.1	372.108	86.85		86.85				-5.35		Negative	5	17128		174872	2	Find by Molecular Feature											100
TRUE	80	SW cooked.d						7.866	371.1	372.108									Negative	2	21493		186088		Find by Molecular Feature											100
TRUE	51	SW cooked.d	DBSearch	DIMBOA-glucoside	C15 H19 N O10			6.125	372.094	373.102	83.37		83.37				-2.49		Negative	3	10117		92108	3	Find by Molecular Feature											100
TRUE	61	BW cooked rpt.d	DBSearch	DIMBOA-glucoside	C15 H19 N O10			6.124	372.094	373.102	92.19		92.19				-2.66		Negative	4	8613		72821	3	Find by Molecular Feature											100
TRUE	66	PB cooked.d	DBSearch	DIMBOA-glucoside	C15 H19 N O10			6.119	372.095	373.102	89.12		89.12				-3.76		Negative	4	9989		83929	3	Find by Molecular Feature											100
TRUE	67	PW cooked.d	DBSearch	DIMBOA-glucoside	C15 H19 N O10			6.125	372.095	373.103	87.65		87.65				-4.51		Negative	5	13222		115409	3	Find by Molecular Feature											100
TRUE	75	PW cooked.d	DBSearch	Leonuriside A	C14 H20 O9			6.22	377.109	332.111	92.92		92.92				-0.14		Negative	4	7575		91019	4	Find by Molecular Feature											80
TRUE	118	SW cooked.d	DBSearch	Ecabet	C20 H28 O5 S			13.716	379.159	380.167	79.2		79.2				-2.87		Negative	4	12238		271812	4	Find by Molecular Feature											100
TRUE	130	BW cooked rpt.d	DBSearch	Ecabet	C20 H28 O5 S			13.708	379.16	380.167	77.56		77.56				-4.04		Negative	3	8435		162645	7	Find by Molecular Feature											80
TRUE	59	SW cooked.d	DBSearch	(R)-Pantothenic acid 4'-O-b-D-glucoside	C15 H27 N O10			6.516	380.156	381.164	98.68		98.68				-0.23		Negative	3	27617		220509	10	Find by Molecular Feature											100
TRUE	70	BW cooked rpt.d	DBSearch	cis-Zeatin 9-glucoside	C16 H23 N5 O6			6.515	380.157	381.164	95.42		95.42				1.65		Negative	5	21274		190159	10	Find by Molecular Feature											100
TRUE	82	PW cooked.d	DBSearch	cis-Zeatin 9-glucoside	C16 H23 N5 O6			6.519	380.157	381.164	97.03		97.03				0.96		Negative	5	22075		184018	10	Find by Molecular Feature											100
TRUE	13	BW cooked rpt.d						1.504	380.843	381.851									Negative	5	15761		136520		Find by Molecular Feature											100
TRUE	9	PB cooked.d						1.521	380.844	381.851									Negative	3	5038		35661		Find by Molecular Feature											88.8
TRUE	13	SW cooked.d						1.517	380.844	381.851									Negative	5	14038		103199		Find by Molecular Feature											100
TRUE	14	PW cooked.d						1.502	380.844	381.851									Negative	3	11067		73024		Find by Molecular Feature											98
TRUE	83	SW cooked.d	DBSearch	1-O-Sinapoylglucose	C17 H22 O10			8.029	385.114	386.121	80.99		80.99				0.68		Negative	4	20317		196588	10	Find by Molecular Feature											100
TRUE	94	BW cooked rpt.d	DBSearch	1-O-Sinapoylglucose	C17 H22 O10			8.031	385.115	386.121	73.65		73.65				-0.02		Negative	3	9363		99303	10	Find by Molecular Feature											100
TRUE	121	PW cooked.d	DBSearch	1-O-Sinapoylglucose	C17 H22 O10			8.035	385.115	386.122	76.98		76.98				-0.92		Negative	3	13580		151007	10	Find by Molecular Feature											100
TRUE	2	PW cooked.d						1.38	386.938	387.945									Negative	5	13434		167516		Find by Molecular Feature											89
TRUE	2	PB cooked.d						1.385	386.939	387.947									Negative	5	24523		292726		Find by Molecular Feature											83.1
TRUE	1	SW cooked.d						1.382	386.94	387.947									Negative	5	34085		437206		Find by Molecular Feature											100
TRUE	25	BW cooked rpt.d	DBSearch	Galactinol dihydrate	C12 H22 O11			1.636	387.115	342.117	95.94		95.94				-1.69		Negative	4	32792		308930	10	Find by Molecular Feature											88.7
TRUE	19	PW cooked.d	DBSearch	Galactinol dihydrate	C12 H22 O11			1.577	387.115	342.116	98.88		98.88				-0.79		Negative	3	21355		158833	10	Find by Molecular Feature											93
TRUE	21	SW cooked.d	DBSearch	Galactinol dihydrate	C12 H22 O11			1.611	387.115	342.117	97.47		97.47				-1.57		Negative	3	26729		145814	10	Find by Molecular Feature											82.1
TRUE	71	SW cooked.d	DBSearch	Shanzhiside	C16 H24 O11			7.434	391.125	392.132	97.73		97.73				-1.24		Negative	3	25994		214842	10	Find by Molecular Feature											100
TRUE	85	BW cooked rpt.d	DBSearch	Shanzhiside	C16 H24 O11			7.437	391.125	392.133	84.89		84.89				-2.53		Negative	3	14415		128951	10	Find by Molecular Feature											100
TRUE	109	PW cooked.d						7.446	391.127	392.134									Negative	2	6448		53226		Find by Molecular Feature											100
TRUE	100	BW cooked rpt.d	DBSearch	Myriocin	C21 H39 N O6			8.891	400.271	401.278	94.16		94.16				-1.03		Negative	3	11637		139170	1	Find by Molecular Feature											100
TRUE	107	BW cooked rpt.d	DBSearch	Myriocin	C21 H39 N O6			9.481	400.272	401.279	95.7		95.7				-2.7		Negative	4	13081		171124	1	Find by Molecular Feature											93.3
TRUE	98	PB cooked.d						7.309	401.111	402.118									Negative	2	5948		53754		Find by Molecular Feature											100
TRUE	81	SW cooked.d	DBSearch	pibutidine	C19 H24 N4 O3			7.93	401.182	356.184	80.55		80.55				2.58		Negative	4	12690		117413	5	Find by Molecular Feature											99.4
TRUE	77	SW cooked.d	DBSearch	(-)-erythro-Anethole glycol 2-glucoside	C16 H24 O8			7.665	403.161	344.148	81.23		81.23				-1.84		Negative	2	10210		96431	5	Find by Molecular Feature											100
TRUE	10	SW cooked.d						1.479	410.862	411.87									Negative	5	17696		128815		Find by Molecular Feature											100
TRUE	9	PW cooked.d	DBSearch	Dicloralurea	C5 H6 Cl6 N2 O3			1.47	410.863	351.849	58.42		58.42				4.18		Negative	5	10942		85359	1	Find by Molecular Feature											86.1
TRUE	91	BW cooked rpt.d	DBSearch	Futalosine	C19 H18 N4 O7			7.715	413.11	414.118	80.9		80.9				-1		Negative	2	12036		130900	10	Find by Molecular Feature											100
TRUE	115	PW cooked.d	DBSearch	Futalosine	C19 H18 N4 O7			7.714	413.111	414.118	81.9		81.9				-1.45		Negative	2	6758		71448	10	Find by Molecular Feature											100
TRUE	96	BW cooked rpt.d						8.442	414.251	415.258									Negative	2	7626		85656		Find by Molecular Feature											100
TRUE	78	SW cooked.d	DBSearch	Phenylethyl primeveroside	C19 H28 O10			7.668	415.161	416.168	94.41		94.41				0.41		Negative	5	24836		401613	3	Find by Molecular Feature											100
TRUE	89	BW cooked rpt.d	DBSearch	Phenylethyl primeveroside	C19 H28 O10			7.667	415.162	416.169	90.97		90.97				-2.13		Negative	3	7897		117130	3	Find by Molecular Feature											100
TRUE	74	SW cooked.d	DBSearch	Phenylethyl primeveroside	C19 H28 O10			7.503	415.162	416.169	78.12		78.12				-2.51		Negative	2	13679		69377	3	Find by Molecular Feature											85.6
TRUE	97	BW cooked rpt.d						8.598	416.267	417.274									Negative	3	43494		513515		Find by Molecular Feature											100
TRUE	104	PW cooked.d	DBSearch	Veranisatin C	C16 H20 O10			7.36	417.105	372.107	95.36		95.36				-3.16		Negative	4	27263		202944	3	Find by Molecular Feature											100
TRUE	68	SW cooked.d	DBSearch	N1-(5-Phospho-a-D-ribosyl)-5,6-dimethylbenzimidazole	C14 H19 N2 O7 P			7.363	417.106	358.092	94.11		94.11				2.71		Negative	4	38242		316320	1	Find by Molecular Feature											100
TRUE	84	BW cooked rpt.d	DBSearch	N1-(5-Phospho-a-D-ribosyl)-5,6-dimethylbenzimidazole	C14 H19 N2 O7 P			7.363	417.106	358.093	89.51		89.51				0.72		Negative	4	10603		95482	1	Find by Molecular Feature											94.4
TRUE	62	PW cooked.d	DBSearch	Oleoside dimethyl ester	C18 H26 O11			5.987	417.141	418.148	92.13		92.13				-1.16		Negative	3	11572		111937	8	Find by Molecular Feature											100
TRUE	41	PB cooked.d						5.148	425.143	426.15									Negative	3	5860		109741		Find by Molecular Feature											100
TRUE	98	BW cooked rpt.d						8.701	430.281	431.289									Negative	2	10113		119762		Find by Molecular Feature											100
TRUE	109	PB cooked.d	DBSearch	Quizalofop-ethyl	C19 H17 Cl N2 O4			7.931	431.101	372.087	55.62		55.62				2.78		Negative	2	8316		68881	2	Find by Molecular Feature											100
TRUE	86	BW cooked rpt.d	DBSearch	Sonchuionoside C	C19 H30 O8			7.5	431.192	386.194	82.19		82.19				0.06		Negative	2	15521		138844	3	Find by Molecular Feature											100
TRUE	72	SW cooked.d	DBSearch	Sonchuionoside C	C19 H30 O8			7.495	431.193	386.194	81.78		81.78				-0.63		Negative	2	25702		246537	3	Find by Molecular Feature											100
TRUE	110	PW cooked.d	DBSearch	Sonchuionoside C	C19 H30 O8			7.502	431.193	386.195	79.22		79.22				-1.34		Negative	2	9039		90703	3	Find by Molecular Feature											100
TRUE	103	PB cooked.d	DBSearch	Sonchuionoside C	C19 H30 O8			7.51	431.193	386.195	76.89		76.89				-1.51		Negative	2	6913		78238	3	Find by Molecular Feature											100
TRUE	104	PB cooked.d	DBSearch	9,13-Dihydroxy-4-megastigmen-3-one 9-glucoside	C19 H32 O8			7.545	433.21	388.211	84.43		84.43				-4.21		Negative	3	5800		51078	7	Find by Molecular Feature											87
TRUE	131	PB cooked.d	DBSearch	Polysorbate 60	C22 H42 O8			9.925	433.281	434.288	98.58		98.58				-0.88		Negative	3	20825		260722	1	Find by Molecular Feature											100
TRUE	26	BW cooked rpt.d	DBSearch	3,5-Dihydroxyphenyl 1-O-(6-O-galloyl-beta-D-glucopyranoside)	C19 H20 O12			1.722	439.086	440.094	85.04		85.04				4.43		Negative	3	11203		91301	1	Find by Molecular Feature											100
TRUE	7	SW cooked.d						1.448	440.882	441.889									Negative	6	15907		101403		Find by Molecular Feature											81.3
TRUE	32	PW cooked.d						2.198	445.12	446.127									Negative	3	8769		239701		Find by Molecular Feature											81.4
TRUE	26	PB cooked.d						2.203	445.121	446.128									Negative	3	8654		233650		Find by Molecular Feature											88.4
TRUE	97	PB cooked.d	DBSearch	Luteolin 4'-O-glucoside	C21 H20 O11			7.252	447.095	448.103	90.17		90.17				-4.5		Negative	7	23148		374094	10	Find by Molecular Feature											100
TRUE	70	SW cooked.d						7.406	447.116	448.123									Negative	3	10878		88301		Find by Molecular Feature											100
TRUE	114	PW cooked.d	DBSearch	Neocarthamin	C21 H22 O11			7.672	449.11	450.117	92.43		92.43				-2.66		Negative	3	7380		65046	10	Find by Molecular Feature											98
TRUE	99	BW cooked rpt.d						8.879	449.276	450.283									Negative	3	8877		84249		Find by Molecular Feature											100
TRUE	93	SW cooked.d						8.879	449.276	450.283									Negative	3	13579		122877		Find by Molecular Feature											100
TRUE	123	PW cooked.d						8.882	449.276	450.284									Negative	2	11375		87861		Find by Molecular Feature											100
TRUE	121	PB cooked.d						8.885	449.277	450.284									Negative	3	7664		75447		Find by Molecular Feature											100
TRUE	84	PB cooked.d	DBSearch	(-)-epicatechin-3'-O-glucuronide	C21 H24 O11			6.889	451.126	452.133	94.53		94.53				-3.24		Negative	7	42901		409838	10	Find by Molecular Feature											100
TRUE	41	BW cooked rpt.d						4.003	454.194	455.201									Negative	3	8426		415879		Find by Molecular Feature											82.9
TRUE	19	BW cooked rpt.d						1.612	460.167	461.175									Negative	3	10447		35772		Find by Molecular Feature											93.1
TRUE	113	PB cooked.d	DBSearch	Kaempferol 3-glucuronide	C21 H18 O12			8.184	461.075	462.082	71.96		71.96				-4.48		Negative	6	13610		470636	3	Find by Molecular Feature											100
TRUE	110	PB cooked.d	DBSearch	Myricitrin	C21 H20 O12			8.009	463.09	464.097	90.07		90.07				-2.89		Negative	3	11612		105549	10	Find by Molecular Feature											99.5
TRUE	51	PB cooked.d	DBSearch	Oleoside dimethyl ester	C18 H26 O11			5.637	463.145	418.147	96.42		96.42				0.76		Negative	3	7022		93201	5	Find by Molecular Feature											100
TRUE	52	BW cooked rpt.d	DBSearch	Oleoside dimethyl ester	C18 H26 O11			5.636	463.146	418.147	79.1		79.1				0.05		Negative	2	10194		136715	5	Find by Molecular Feature											100
TRUE	54	PW cooked.d	DBSearch	Oleoside dimethyl ester	C18 H26 O11			5.648	463.146	418.148	91.77		91.77				-0.11		Negative	3	6920		81931	5	Find by Molecular Feature											100
TRUE	59	BW cooked rpt.d	DBSearch	Oleoside dimethyl ester	C18 H26 O11			6.06	463.146	418.148	97.51		97.51				-0.8		Negative	7	28742		501066	5	Find by Molecular Feature											100
TRUE	49	SW cooked.d	DBSearch	Oleoside dimethyl ester	C18 H26 O11			6.066	463.147	418.148	97.83		97.83				-2.03		Negative	8	48417		773439	5	Find by Molecular Feature											100
TRUE	64	PW cooked.d	DBSearch	Oleoside dimethyl ester	C18 H26 O11			6.074	463.147	418.149	97.33		97.33				-2.31		Negative	8	51300		923831	5	Find by Molecular Feature											100
TRUE	64	PB cooked.d						6.074	463.148	464.155									Negative	8	50623		877270		Find by Molecular Feature											100
TRUE	11	BW cooked rpt.d						1.504	464.805	465.812									Negative	5	8725		80224		Find by Molecular Feature											100
TRUE	96	PB cooked.d	DBSearch	Glucodistylin	C21 H22 O12			7.247	465.106	466.113	92.76		92.76				-3.77		Negative	4	29343		389090	6	Find by Molecular Feature											100
TRUE	103	PW cooked.d						7.328	465.106	466.113									Negative	3	7849		66899		Find by Molecular Feature											100
TRUE	57	PW cooked.d	DBSearch	Bis-N-butyl phthalate	C22 H29 N O10			5.719	466.171	467.179	98.44		98.44				0.56		Negative	3	18821		207250	1	Find by Molecular Feature											100
TRUE	45	SW cooked.d	DBSearch	Bis-N-butyl phthalate	C22 H29 N O10			5.723	466.172	467.179	97.26		97.26				0.05		Negative	3	11271		131611	1	Find by Molecular Feature											100
TRUE	54	PB cooked.d	DBSearch	Bis-N-butyl phthalate	C22 H29 N O10			5.715	466.172	467.179	99.13		99.13				-0.13		Negative	3	12106		142008	1	Find by Molecular Feature											100
TRUE	54	BW cooked rpt.d	DBSearch	Bis-N-butyl phthalate	C22 H29 N O10			5.694	466.172	467.179	98.97		98.97				-0.22		Negative	3	25652		342025	1	Find by Molecular Feature											100
TRUE	34	PW cooked.d	DBSearch	Hyaluronic acid	C16 H27 N O12			2.911	470.152	425.154	97.09		97.09				-2.17		Negative	4	25891		732662	1	Find by Molecular Feature											100
TRUE	38	BW cooked rpt.d	DBSearch	Hyaluronic acid	C16 H27 N O12			2.912	470.153	425.154	73.88		73.88				-2.25		Negative	2	7497		207275	1	Find by Molecular Feature											90.9
TRUE	29	PB cooked.d	DBSearch	Hyaluronic acid	C16 H27 N O12			2.889	470.153	425.155	75.49		75.49				-3.56		Negative	2	11098		305482	1	Find by Molecular Feature											100
TRUE	16	BW cooked rpt.d						1.562	471.076	472.083									Negative	3	7905		44550		Find by Molecular Feature											80
TRUE	17	PW cooked.d						1.547	471.076	472.083									Negative	4	17648		103658		Find by Molecular Feature											91.1
TRUE	16	SW cooked.d						1.558	471.077	472.084									Negative	4	10437		65267		Find by Molecular Feature											91.1
TRUE	114	BW cooked rpt.d	DBSearch	LysoPE(0:0/18:3(9Z,12Z,15Z))	C23 H42 N O7 P			10.441	474.264	475.271	91.33		91.33				-2.73		Negative	4	21171		261569	6	Find by Molecular Feature											100
TRUE	105	SW cooked.d	DBSearch	LysoPE(0:0/18:3(9Z,12Z,15Z))	C23 H42 N O7 P			10.442	474.264	475.271	78.51		78.51				-2.73		Negative	2	13420		163694	6	Find by Molecular Feature											100
TRUE	135	PB cooked.d	DBSearch	LysoPE(0:0/18:3(9Z,12Z,15Z))	C23 H42 N O7 P			10.448	474.264	475.271	94.55		94.55				-3.14		Negative	3	11207		138496	6	Find by Molecular Feature											87.9
TRUE	139	PW cooked.d	DBSearch	Mifepristone	C29 H35 N O2			10.444	474.265	429.266	94.94		94.94				0.94		Negative	3	26186		316139	6	Find by Molecular Feature											100
TRUE	118	PB cooked.d	DBSearch	Diosmetin 7-O-beta-D-glucuronopyranoside	C22 H20 O12			8.509	475.09	476.097	73.85		73.85				-3.65		Negative	2	13989		426677	6	Find by Molecular Feature											92.6
TRUE	29	BW cooked rpt.d						1.856	475.131	476.138									Negative	2	9784		92785		Find by Molecular Feature											87
TRUE	29	SW cooked.d						1.997	475.131	476.138									Negative	4	21354		682936		Find by Molecular Feature											85.2
TRUE	28	PW cooked.d						1.993	475.131	476.138									Negative	2	17332		477421		Find by Molecular Feature											100
TRUE	142	PW cooked.d	DBSearch	LysoPE(18:2(9Z,12Z)/0:0)	C23 H44 N O7 P			10.851	476.28	477.287	95.57		95.57				-2.81		Negative	4	52401		735133	2	Find by Molecular Feature											100
TRUE	109	SW cooked.d	DBSearch	LysoPE(18:2(9Z,12Z)/0:0)	C23 H44 N O7 P			10.841	476.28	477.287	95.01		95.01				-3.04		Negative	7	56949		997399	2	Find by Molecular Feature											100
TRUE	141	PB cooked.d	DBSearch	LysoPE(18:2(9Z,12Z)/0:0)	C23 H44 N O7 P			10.855	476.28	477.287	93.26		93.26				-3.68		Negative	7	50336		915618	2	Find by Molecular Feature											100
TRUE	119	BW cooked rpt.d	DBSearch	LysoPE(18:2(9Z,12Z)/0:0)	C23 H44 N O7 P			10.844	476.281	477.288	90.85		90.85				-4.33		Negative	8	56941		1101483	2	Find by Molecular Feature											100
TRUE	40	SW cooked.d	DBSearch	Propylene glycol alginate	C17 H28 O13			5.587	485.152	440.153	94.24		94.24				-0.48		Negative	3	9963		156176	2	Find by Molecular Feature											100
TRUE	48	PW cooked.d	DBSearch	Propylene glycol alginate	C17 H28 O13			5.584	485.152	440.154	93.48		93.48				-1.44		Negative	3	6291		88999	3	Find by Molecular Feature											100
TRUE	23	PW cooked.d						1.619	488.164	489.171									Negative	2	9123		25448		Find by Molecular Feature											84.6
TRUE	79	PW cooked.d						6.362	488.178	489.185									Negative	4	8048		138574		Find by Molecular Feature											97.5
TRUE	68	BW cooked rpt.d						6.335	488.178	489.185									Negative	8	25229		483030		Find by Molecular Feature											100
TRUE	115	PB cooked.d	DBSearch	Syringolin A	C24 H39 N5 O6			8.25	492.283	493.291	67.47		67.47				-1.33		Negative	4	5864		52305	1	Find by Molecular Feature											100
TRUE	76	PW cooked.d						6.311	493.158	494.164									Negative	5	9584		100483		Find by Molecular Feature											100
TRUE	48	SW cooked.d						6.066	499.123	500.13									Negative	5	12766		155737		Find by Molecular Feature											100
TRUE	58	BW cooked rpt.d						6.053	499.123	500.13									Negative	4	8077		138747		Find by Molecular Feature											100
TRUE	63	PW cooked.d						6.067	499.123	500.131									Negative	5	13861		166904		Find by Molecular Feature											100
TRUE	62	PB cooked.d						6.064	499.124	500.131									Negative	4	17243		197050		Find by Molecular Feature											100
TRUE	2	SW cooked.d						1.383	500.92	501.927									Negative	3	25311		277660		Find by Molecular Feature											99.7
TRUE	97	PW cooked.d						7.079	504.139	505.146									Negative	7	41848		388698		Find by Molecular Feature											100
TRUE	50	SW cooked.d						6.072	509.151	510.159									Negative	4	50553		485834		Find by Molecular Feature											100
TRUE	60	BW cooked rpt.d						6.065	509.152	510.159									Negative	3	27906		345551		Find by Molecular Feature											100
TRUE	65	PW cooked.d						6.077	509.152	510.159									Negative	4	49519		466660		Find by Molecular Feature											100
TRUE	63	PB cooked.d						6.074	509.153	510.16									Negative	4	54992		529981		Find by Molecular Feature											100
TRUE	138	PB cooked.d	DBSearch	LysoPE(0:0/16:0)	C21 H44 N O7 P			10.525	512.301	453.287	93.37		93.37				-3.54		Negative	3	10686		166074	3	Find by Molecular Feature											100
TRUE	140	PW cooked.d	DBSearch	Buprenorphine	C29 H41 N O4			10.5	512.301	467.303	95.53		95.53				0.58		Negative	3	8075		80122	3	Find by Molecular Feature											100
TRUE	58	SW cooked.d	DBSearch	S-Formylmycothiol	C18 H30 N2 O13 S			6.322	513.14	514.148	95.83		95.83				-1.73		Negative	5	11472		106654	5	Find by Molecular Feature											100
TRUE	61	SW cooked.d						6.978	527.189	528.196									Negative	3	14690		154388		Find by Molecular Feature											100
TRUE	75	BW cooked rpt.d						6.972	527.189	528.196									Negative	4	64903		730852		Find by Molecular Feature											100
TRUE	93	PW cooked.d	DBSearch	Physalin O	C28 H32 O10			6.975	527.19	528.197	82.81		82.81				4.93		Negative	4	47852		481222	2	Find by Molecular Feature											100
TRUE	27	SW cooked.d						1.771	539.138	540.145									Negative	6	41228		288676		Find by Molecular Feature											80
TRUE	28	BW cooked rpt.d	DBSearch	4'-O-methyl-(-)-epicatechin-3'-O-beta-glucuronide	C23 H26 O12			1.787	539.139	494.139	44.26		44.26				6.96		Negative	6	54832		727166	6	Find by Molecular Feature											100
TRUE	16	PB cooked.d	DBSearch	4'-O-methyl-(-)-epicatechin-3'-O-beta-glucuronide	C23 H26 O12			1.767	539.139	494.139	41.25		41.25				7.54		Negative	5	29349		334420	6	Find by Molecular Feature											100
TRUE	35	BW cooked rpt.d	DBSearch	4'-O-methyl-(-)-epicatechin-3'-O-beta-glucuronide	C23 H26 O12			2.085	539.139	494.139	46.39		46.39				6.4		Negative	5	54030		1654655	6	Find by Molecular Feature											100
TRUE	33	SW cooked.d	DBSearch	4'-O-methyl-(-)-epicatechin-3'-O-beta-glucuronide	C23 H26 O12			2.076	539.139	494.139	42.81		42.81				7.12		Negative	5	31009		846271	6	Find by Molecular Feature											80
TRUE	144	PB cooked.d	DBSearch	LysoPE(0:0/18:0)	C23 H48 N O7 P			11.361	540.332	481.318	92.64		92.64				-3.09		Negative	3	21338		419759	1	Find by Molecular Feature											80
TRUE	113	SW cooked.d	DBSearch	LysoPE(0:0/18:0)	C23 H48 N O7 P			11.353	540.333	481.319	91.82		91.82				-4.1		Negative	4	31368		428148	1	Find by Molecular Feature											100
TRUE	122	BW cooked rpt.d						11.384	540.333	541.341									Negative	4	26353		675955		Find by Molecular Feature											90.3
TRUE	146	PW cooked.d						11.388	540.333	541.341									Negative	4	24839		549252		Find by Molecular Feature											96.9
TRUE	12	SW cooked.d						1.517	548.766	549.773									Negative	5	11320		79423		Find by Molecular Feature											100
TRUE	13	PW cooked.d						1.501	548.766	549.774									Negative	5	7105		56400		Find by Molecular Feature											96.4
TRUE	10	BW cooked rpt.d						1.504	548.766	549.774									Negative	5	11453		107841		Find by Molecular Feature											100
TRUE	27	BW cooked rpt.d	DBSearch	beta-D-Galactopyranosyl-(1->4)-beta-D-galactopyranosyl-(1->4)-D-galactose	C18 H32 O16			1.78	549.167	504.171	56.7		56.7				-3.33		Negative	4	7433		105275	10	Find by Molecular Feature											80
TRUE	40	PB cooked.d						5.133	550.166	551.173									Negative	3	7007		142556		Find by Molecular Feature											100
TRUE	132	PW cooked.d						9.731	556.326	557.333									Negative	4	10970		137525		Find by Molecular Feature											98.8
TRUE	107	SW cooked.d	DBSearch	LysoPE(20:3(11Z,14Z,17Z)/0:0)	C25 H46 N O7 P			10.663	562.316	503.302	98.54		98.54				-1.49		Negative	4	26172		362005	6	Find by Molecular Feature											100
TRUE	139	PB cooked.d	DBSearch	LysoPE(20:3(11Z,14Z,17Z)/0:0)	C25 H46 N O7 P			10.682	562.316	503.302	97.27		97.27				-1.87		Negative	4	18844		291389	6	Find by Molecular Feature											100
TRUE	141	PW cooked.d	DBSearch	LysoPE(20:3(11Z,14Z,17Z)/0:0)	C25 H46 N O7 P			10.669	562.317	503.303	94		94				-3.11		Negative	4	43676		842724	6	Find by Molecular Feature											100
TRUE	117	BW cooked rpt.d	DBSearch	LysoPE(20:3(11Z,14Z,17Z)/0:0)	C25 H46 N O7 P			10.659	562.317	503.303	91.26		91.26				-4.05		Negative	4	31839		549783	6	Find by Molecular Feature											100
TRUE	75	SW cooked.d	DBSearch	Kaempferol 3-rhamnoside 7-xyloside	C26 H28 O14			7.619	563.141	564.148	98.69		98.69				-0.52		Negative	4	66839		821263	10	Find by Molecular Feature											100
TRUE	87	BW cooked rpt.d	DBSearch	Kaempferol 3-rhamnoside 7-xyloside	C26 H28 O14			7.617	563.142	564.149	96.17		96.17				-2.54		Negative	4	61066		827250	10	Find by Molecular Feature											100
TRUE	112	PW cooked.d	DBSearch	Kaempferol 3-rhamnoside 7-xyloside	C26 H28 O14			7.621	563.143	564.15	92.86		92.86				-3.58		Negative	4	68044		996159	10	Find by Molecular Feature											100
TRUE	105	PB cooked.d						7.621	563.144	564.151									Negative	3	5683		64941		Find by Molecular Feature											100
TRUE	111	SW cooked.d	DBSearch	Cucurbitacin P	C30 H48 O7			11.11	565.336	520.337	55.14		55.14				4.96		Negative	2	10402		257387	2	Find by Molecular Feature											96
TRUE	147	PB cooked.d	DBSearch	LysoPE(0:0/20:1(11Z))	C25 H50 N O7 P			11.741	566.346	507.333	99.33		99.33				-0.45		Negative	3	5675		132590	3	Find by Molecular Feature											100
TRUE	124	BW cooked rpt.d	DBSearch	Gymnodimine	C32 H45 N O4			11.733	566.348	507.334	94.62		94.62				1.75		Negative	3	14630		367472	3	Find by Molecular Feature											100
TRUE	116	SW cooked.d	DBSearch	Gymnodimine	C32 H45 N O4			11.717	566.348	507.334	96.69		96.69				1.51		Negative	3	11561		227047	3	Find by Molecular Feature											100
TRUE	149	PW cooked.d	DBSearch	Gymnodimine	C32 H45 N O4			11.73	566.349	507.335	96.95		96.95				0.08		Negative	3	13397		321963	3	Find by Molecular Feature											100
TRUE	55	PW cooked.d	DBSearch	Dide-O-methyl-4-O-alpha-D-glucopyranosylsimmondsin	C20 H31 N O14			5.654	568.189	509.175	82.39		82.39				-1.48		Negative	3	9266		100249	1	Find by Molecular Feature											100
TRUE	100	PB cooked.d	DBSearch	Trichotomine	C30 H20 N4 O6			7.451	577.136	532.138	75.6		75.6				0.84		Negative	2	50330		419226	10	Find by Molecular Feature											100
TRUE	89	PB cooked.d	DBSearch	(2S,2''S,3S,3''R,4S)-3,4',5,7-Tetrahydroxyflavan(2->7,4->8)-3,4',5,7-tetrahydroxyflavan	C30 H24 O10			7.076	589.136	544.135	58.34		58.34				3.27		Negative	3	5797		51053	1	Find by Molecular Feature											100
TRUE	90	PB cooked.d	DBSearch	7-O-(4-Hydroxycinnamoyl) astragalin	C30 H26 O13			7.095	593.131	594.139	91.81		91.81				-1.9		Negative	4	28442		219926	10	Find by Molecular Feature											100
TRUE	106	PB cooked.d	DBSearch	Quercetin 3,7-dirhamnoside	C27 H30 O15			7.65	593.152	594.159	93.57		93.57				-0.88		Negative	3	6253		63860	10	Find by Molecular Feature											100
TRUE	58	PB cooked.d	DBSearch	Genipin 1-beta-gentiobioside	C23 H34 O15			5.92	595.189	550.191	87.08		87.08				-1.65		Negative	3	5636		65706	1	Find by Molecular Feature											100
TRUE	60	PW cooked.d	DBSearch	Genipin 1-beta-gentiobioside	C23 H34 O15			5.922	595.189	550.191	88.92		88.92				-2.65		Negative	4	11095		144441	1	Find by Molecular Feature											100
TRUE	50	PW cooked.d	DBSearch	Deoxycholic acid disulfate	C24 H40 O10 S2			5.596	597.204	552.206	87.47		87.47				0.71		Negative	3	14527		208256	2	Find by Molecular Feature											100
TRUE	45	BW cooked rpt.d						5.079	601.153	602.16									Negative	4	9142		316804		Find by Molecular Feature											100
TRUE	37	PB cooked.d						5.077	601.153	602.16									Negative	5	19342		451820		Find by Molecular Feature											100
TRUE	43	PW cooked.d	DBSearch	Amaroswerin	C29 H30 O14			5.103	601.154	602.158	31.89		31.89				8.91		Negative	5	18094		458125	1	Find by Molecular Feature											100
TRUE	78	PB cooked.d	DBSearch	Leiocarposide	C27 H34 O16			6.525	613.179	614.187	91.98		91.98				-3.02		Negative	4	10893		97923	8	Find by Molecular Feature											100
TRUE	92	PW cooked.d						6.9	615.312	616.319									Negative	2	7371		55133		Find by Molecular Feature											100
TRUE	67	BW cooked rpt.d						6.2	625.199	626.206									Negative	4	36245		543262		Find by Molecular Feature											100
TRUE	73	PW cooked.d						6.204	625.199	626.207									Negative	5	61879		711098		Find by Molecular Feature											97.9
TRUE	71	PB cooked.d						6.208	625.2	626.207									Negative	4	73427		885369		Find by Molecular Feature											100
TRUE	57	SW cooked.d						6.205	625.2	626.207									Negative	3	63431		819174		Find by Molecular Feature											100
TRUE	136	PB cooked.d	DBSearch	Muricin H	C35 H64 O6			10.469	625.468	580.47	71.43		71.43				0.66		Negative	2	11149		140585	6	Find by Molecular Feature											100
TRUE	75	PB cooked.d	DBSearch	Norrubrofusarin 6-beta-gentiobioside	C26 H30 O15			6.387	627.158	582.161	87.36		87.36				-3.74		Negative	4	12109		170171	2	Find by Molecular Feature											100
TRUE	127	PB cooked.d	DBSearch	Euphornin	C33 H44 O9			9.364	629.297	584.298	97.18		97.18				0.25		Negative	4	9781		95888	2	Find by Molecular Feature											98
TRUE	87	PW cooked.d						6.686	631.306	632.313									Negative	3	6995		64980		Find by Molecular Feature											100
TRUE	11	SW cooked.d						1.515	632.727	633.734									Negative	5	10316		81208		Find by Molecular Feature											100
TRUE	12	PW cooked.d						1.5	632.728	633.735									Negative	5	6862		55964		Find by Molecular Feature											89.9
TRUE	9	BW cooked rpt.d						1.502	632.728	633.735									Negative	5	11182		107282		Find by Molecular Feature											100
TRUE	23	PB cooked.d						2.035	637.183	638.191									Negative	2	7997		159963		Find by Molecular Feature											98.9
TRUE	46	PB cooked.d						5.593	646.14	647.147									Negative	3	6940		122178		Find by Molecular Feature											100
TRUE	77	PW cooked.d						6.32	655.211	656.218									Negative	3	18595		183203		Find by Molecular Feature											100
TRUE	95	SW cooked.d	DBSearch	Muricatalin	C35 H64 O8			9.103	657.458	612.46	72.41		72.41				0.58		Negative	2	37864		198035	10	Find by Molecular Feature											100
TRUE	127	PW cooked.d	DBSearch	Muricatalin	C35 H64 O8			9.116	657.458	612.46	70.68		70.68				0.19		Negative	2	21518		123672	10	Find by Molecular Feature											100
TRUE	102	BW cooked rpt.d	DBSearch	Muricatalin	C35 H64 O8			9.108	657.46	612.461	68.68		68.68				-1.08		Negative	2	23132		114335	10	Find by Molecular Feature											100
TRUE	65	BW cooked rpt.d	DBSearch	Amaroswerin	C29 H30 O14			6.196	661.175	602.16	49.22		49.22				5.89		Negative	4	8194		181351	1	Find by Molecular Feature											100
TRUE	72	PB cooked.d	DBSearch	Amaroswerin	C29 H30 O14			6.213	661.176	602.16	47.36		47.36				6		Negative	5	13819		271715	1	Find by Molecular Feature											99.1
TRUE	56	SW cooked.d	DBSearch	Amaroswerin	C29 H30 O14			6.204	661.176	602.16	49.39		49.39				5.41		Negative	5	10949		210628	1	Find by Molecular Feature											100
TRUE	71	PW cooked.d	DBSearch	Amaroswerin	C29 H30 O14			6.203	661.176	602.16	50.93		50.93				5.25		Negative	4	9976		172374	1	Find by Molecular Feature											100
TRUE	70	PW cooked.d						6.203	671.204	672.211									Negative	4	70893		782061		Find by Molecular Feature											100
TRUE	66	BW cooked rpt.d						6.196	671.204	672.211									Negative	4	41198		581098		Find by Molecular Feature											100
TRUE	70	PB cooked.d						6.205	671.204	672.212									Negative	5	84763		959204		Find by Molecular Feature											99.7
TRUE	53	SW cooked.d						6.201	671.205	672.212									Negative	4	73617		849093		Find by Molecular Feature											100
TRUE	33	PW cooked.d	DBSearch	Citbismine C	C37 H36 N2 O11			2.283	683.224	684.231	93.75		93.75				0.86		Negative	3	6374		117900	1	Find by Molecular Feature											80
TRUE	26	SW cooked.d	DBSearch	Citbismine C	C37 H36 N2 O11			1.623	683.224	684.232	80.32		80.32				0.2		Negative	5	89350		355260	1	Find by Molecular Feature											100
TRUE	26	PW cooked.d	DBSearch	Citbismine C	C37 H36 N2 O11			1.846	683.226	684.232	86.74		86.74				-0.65		Negative	4	6581		165741	1	Find by Molecular Feature											96.5
TRUE	24	BW cooked rpt.d	DBSearch	Citbismine C	C37 H36 N2 O11			1.635	683.226	684.233	78.18		78.18				-2.01		Negative	5	125540		715151	1	Find by Molecular Feature											94.2
TRUE	119	PB cooked.d						8.59	695.386	696.394									Negative	2	5857		61741		Find by Molecular Feature											95.2
TRUE	17	PB cooked.d	DBSearch	Hellicoside	C29 H36 O17			1.775	701.191	656.191	42.28		42.28				6.82		Negative	5	8288		76859	1	Find by Molecular Feature											100
TRUE	36	BW cooked rpt.d	DBSearch	Hellicoside	C29 H36 O17			2.187	701.192	656.192	48.56		48.56				5.56		Negative	5	11746		297967	1	Find by Molecular Feature											80.2
TRUE	25	PW cooked.d	DBSearch	Hellicoside	C29 H36 O17			1.783	701.193	656.192	48.9		48.9				5.15		Negative	5	9351		79404	1	Find by Molecular Feature											87.4
TRUE	78	PW cooked.d						6.32	701.214	702.221									Negative	4	13444		135567		Find by Molecular Feature											100
TRUE	88	PB cooked.d	DBSearch	Neocarzinostatin chromophore	C35 H33 N O12			7.072	704.2	659.201	83.79		83.79				-1.48		Negative	4	5331		50515	1	Find by Molecular Feature											100
TRUE	96	PW cooked.d						7.076	708.227	709.235									Negative	4	21378		191437		Find by Molecular Feature											100
TRUE	12	BW cooked rpt.d						1.504	716.688	717.695									Negative	7	10245		103969		Find by Molecular Feature											100
TRUE	28	SW cooked.d						1.933	719.201	720.208									Negative	7	86524		2435443		Find by Molecular Feature											80
TRUE	19	PB cooked.d						1.892	719.202	720.209									Negative	3	48906		1152699		Find by Molecular Feature											80
TRUE	33	BW cooked rpt.d						1.959	719.202	720.209									Negative	6	86399		2928878		Find by Molecular Feature											97
TRUE	137	PW cooked.d	DBSearch	Gingerglycolipid A	C33 H56 O14			10.29	721.367	676.369	92.11		92.11				-3.16		Negative	3	6312		67255	3	Find by Molecular Feature											100
TRUE	86	PB cooked.d						6.955	722.311	723.319									Negative	4	7190		70574		Find by Molecular Feature											100
TRUE	116	BW cooked rpt.d	DBSearch	Gingerglycolipid B	C33 H58 O14			10.657	723.382	678.384	96.6		96.6				-2.18		Negative	4	9858		165338	1	Find by Molecular Feature											100
TRUE	94	PW cooked.d	DBSearch	19-Hydroxydeacetylnomilinic acid 17-beta-D-glucopyranoside	C32 H46 O16			7.01	731.278	686.279	89.82		89.82				-0.98		Negative	3	10118		74444	1	Find by Molecular Feature											100
TRUE	125	PB cooked.d						9.052	759.323	760.331									Negative	4	23720		403883		Find by Molecular Feature											100
TRUE	120	PB cooked.d						8.87	759.324	760.331									Negative	4	24385		236887		Find by Molecular Feature											100
TRUE	105	PW cooked.d						7.377	760.197	761.204									Negative	3	12552		93932		Find by Molecular Feature											100
TRUE	122	PB cooked.d	DBSearch	3'-Galloylprodelphinidin B2	C37 H30 O18			8.964	761.137	762.144	89.23		89.23				-1.35		Negative	4	9785		140523	4	Find by Molecular Feature											94.8
TRUE	120	PW cooked.d	DBSearch	Isorhamnetin 3-O-[4-Hydroxy-E-cinnamoyl-(->6)-b-D-glucopyranosyl-(1->2)-a-L-rhamnopyranoside]	C37 H38 O18			8.023	769.198	770.207	88.21		88.21				-1.27		Negative	4	15480		233795	2	Find by Molecular Feature											100
TRUE	34	BW cooked rpt.d						1.992	781.202	782.209									Negative	4	9202		188454		Find by Molecular Feature											96.6
TRUE	94	PB cooked.d	DBSearch	Hordatine B glucoside	C35 H50 N8 O10			7.168	787.362	742.363	84.17		84.17				2.12		Negative	3	7481		89307	1	Find by Molecular Feature											100
TRUE	146	PB cooked.d	DBSearch	PS(18:0/18:0)	C42 H82 N O10 P			11.523	790.561	791.567	96.42		96.42				0.19		Negative	4	6928		186885	10	Find by Molecular Feature											100
TRUE	148	PW cooked.d	DBSearch	PS(18:0/18:0)	C42 H82 N O10 P			11.509	790.563	791.57	92.85		92.85				-2.62		Negative	4	7016		138001	10	Find by Molecular Feature											100
TRUE	114	SW cooked.d	DBSearch	PS(18:0/18:0)	C42 H82 N O10 P			11.49	790.563	791.569	92.44		92.44				-2.16		Negative	4	11172		251757	10	Find by Molecular Feature											100
TRUE	112	BW cooked rpt.d						10.242	800.384	801.391									Negative	5	30096		490050		Find by Molecular Feature											100
TRUE	136	PW cooked.d						10.251	800.388	801.395									Negative	4	8031		108200		Find by Molecular Feature											100
TRUE	7	BW cooked rpt.d						1.5	800.651	801.658									Negative	7	9497		107933		Find by Molecular Feature											100
TRUE	66	PW cooked.d						6.108	836.246	837.254									Negative	4	8772		65883		Find by Molecular Feature											91.5
TRUE	65	PB cooked.d						6.105	836.248	837.255									Negative	4	7431		50696		Find by Molecular Feature											93
TRUE	27	PW cooked.d						1.946	836.28	837.288									Negative	3	7194		188507		Find by Molecular Feature											100
TRUE	32	BW cooked rpt.d						1.944	836.281	837.288									Negative	6	13173		509760		Find by Molecular Feature											97.2
TRUE	68	PB cooked.d						6.202	844.307	845.314									Negative	4	10010		99831		Find by Molecular Feature											100
TRUE	64	BW cooked rpt.d						6.194	844.307	845.314									Negative	4	24984		247669		Find by Molecular Feature											100
TRUE	72	PW cooked.d						6.203	844.309	845.316									Negative	4	27893		271678		Find by Molecular Feature											100
TRUE	54	SW cooked.d						6.201	844.309	845.317									Negative	5	31831		327381		Find by Molecular Feature											100
TRUE	101	PB cooked.d						7.476	867.215	868.222									Negative	4	7394		66612		Find by Molecular Feature											100
TRUE	32	SW cooked.d						2.039	881.253	882.26									Negative	5	12209		535299		Find by Molecular Feature											80
TRUE	22	PB cooked.d						2.022	881.254	882.261									Negative	4	11956		725090		Find by Molecular Feature											99.5
TRUE	8	BW cooked rpt.d						1.5	884.613	885.62									Negative	7	8636		102735		Find by Molecular Feature											100
TRUE	117	PB cooked.d						8.468	951.183	952.19									Negative	3	20171		609732		Find by Molecular Feature											96.7
TRUE	57	PB cooked.d	DBSearch	Maltohexaose	C36 H62 O31			5.792	989.319	990.326	97.22		97.22				1.07		Negative	4	9149		121450	3	Find by Molecular Feature											100
TRUE	68	PW cooked.d						6.159	998.297	999.304									Negative	3	6941		55730		Find by Molecular Feature											100
TRUE	127	BW cooked rpt.d						13.161	1006.65	1007.65									Negative	5	12121		280572		Find by Molecular Feature											96
TRUE	105	BW cooked rpt.d	DBSearch	Madecassoside	C48 H78 O20			9.342	1019.51	974.507	94.82		94.82				1.49		Negative	5	21978		329766	2	Find by Molecular Feature											100
TRUE	128	BW cooked rpt.d						13.639	1020.66	1021.67									Negative	5	77438		1759950		Find by Molecular Feature											98.2
TRUE	108	BW cooked rpt.d	DBSearch	Asparagoside F	C50 H82 O22			9.534	1033.52	1034.53	96.98		96.98				1.71		Negative	5	21802		396617	3	Find by Molecular Feature											100
TRUE	131	BW cooked rpt.d	DBSearch	Surfactin	C53 H93 N7 O13			13.932	1034.68	1035.68	99.62		99.62				-0.43		Negative	5	84336		2597861	1	Find by Molecular Feature											100
TRUE	18	PB cooked.d						1.794	1043.31	1044.31									Negative	4	5219		59322		Find by Molecular Feature											98.1
TRUE	25	PB cooked.d						2.165	1043.31	1044.31									Negative	5	7065		168738		Find by Molecular Feature											86.7
TRUE	31	PW cooked.d						2.134	1043.31	1044.31									Negative	2	6905		165229		Find by Molecular Feature											83.7

## Sheet: CPM PB
Show/Hide	Cpd	File	ID Source	Name	Formula	Flags (Tgt)	Saturated	RT	m/z	Mass	Score	Score (Lib)	Score (DB)	Score (MFG)	RT Diff (Tgt)	Diff (Tgt, ppm)	Diff (DB, ppm)	Diff (MFG, ppm)	Polarity	Ions	Height	Area	Vol	Hits (DB)	Algorithm	Library	AGILENTID	MPPID	NCBI ID	Formula (DB)	Formula (MFG)	Modified	Primary Base	Primary Note	Formula (Tgt)	Score (MFE)
TRUE	43	1.d						1.578	102.957	103.964									Negative	5	25179		277421		Find by Molecular Feature											96
TRUE	29	4.d						1.579	102.957	103.965									Negative	3	16754		199662		Find by Molecular Feature											97.1
TRUE	46	2.d	DBSearch	3-Furoic acid	C5 H4 O3			2.097	111.009	112.016	85.62		85.62				-4.38		Negative	2	10180		97636	5	Find by Molecular Feature											100
TRUE	56	2.d						2.499	111.009	112.017									Negative	3	16212		554212		Find by Molecular Feature											80.7
TRUE	64	1.d						2.515	111.01	112.017									Negative	3	19640		670170		Find by Molecular Feature											80.5
TRUE	21	CPM4u_PB.d						2.662	111.011	112.019									Negative	2	8075		115287		Find by Molecular Feature											83.8
TRUE	37	1.d	DBSearch	trifluoroacetic acid	C2 H F3 O2			1.481	112.986	113.993	87.97		87.97				-0.09		Negative	2	81536		625348	1	Find by Molecular Feature											100
TRUE	47	1.d	DBSearch	trifluoroacetic acid	C2 H F3 O2			1.74	112.986	113.993	87.53		87.53				-0.12		Negative	2	13907		116991	1	Find by Molecular Feature											92.9
TRUE	41	2.d	DBSearch	trifluoroacetic acid	C2 H F3 O2			1.815	112.986	113.993	87.78		87.78				-0.17		Negative	2	26085		140315	1	Find by Molecular Feature											100
TRUE	31	3.d	DBSearch	trifluoroacetic acid	C2 H F3 O2			1.838	112.986	113.993	87.89		87.89				0.1		Negative	2	17624		105650	1	Find by Molecular Feature											96.8
TRUE	5	CPM0u_PB.d	DBSearch	trifluoroacetic acid	C2 H F3 O2			1.534	112.986	113.993	87.8		87.8				-0.29		Negative	2	28184		182367	1	Find by Molecular Feature											100
TRUE	5	CPM4u_PB.d	DBSearch	trifluoroacetic acid	C2 H F3 O2			1.51	112.986	113.993	87.81		87.81				-0.2		Negative	2	21211		177746	1	Find by Molecular Feature											100
TRUE	30	2.d	DBSearch	trifluoroacetic acid	C2 H F3 O2			1.475	112.986	113.993	87.79		87.79				-1.23		Negative	2	57676		459153	1	Find by Molecular Feature											100
TRUE	24	3.d	DBSearch	trifluoroacetic acid	C2 H F3 O2			1.469	112.986	113.993	87.82		87.82				-1.15		Negative	2	53010		330207	1	Find by Molecular Feature											100
TRUE	24	4.d	DBSearch	trifluoroacetic acid	C2 H F3 O2			1.481	112.986	113.993	87.9		87.9				-1.05		Negative	2	52308		369563	1	Find by Molecular Feature											100
TRUE	38	5.d	DBSearch	trifluoroacetic acid	C2 H F3 O2			1.798	112.986	113.993	87.74		87.74				-0.99		Negative	2	27400		133445	1	Find by Molecular Feature											100
TRUE	27	5.d	DBSearch	trifluoroacetic acid	C2 H F3 O2			1.477	112.986	113.993	87.73		87.73				-1.39		Negative	2	57723		438368	1	Find by Molecular Feature											100
TRUE	31	5.d						1.639	113.022	114.029									Negative	2	5402		30057		Find by Molecular Feature											85.4
TRUE	32	4.d						1.719	114.055	115.062									Negative	2	5670		17858		Find by Molecular Feature											89.3
TRUE	33	5.d	DBSearch	D-Proline	C5 H9 N O2			1.707	114.056	115.064	76.97		76.97				-1.95		Negative	2	5719		28836	6	Find by Molecular Feature											83.3
TRUE	6	4.d						1.38	114.988	115.995									Negative	2	11627		72182		Find by Molecular Feature											86.1
TRUE	9	1.d						1.381	114.989	115.996									Negative	2	17306		173036		Find by Molecular Feature											100
TRUE	8	3.d						1.378	114.989	115.996									Negative	2	10838		104770		Find by Molecular Feature											100
TRUE	9	2.d						1.384	114.989	115.996									Negative	2	13513		128439		Find by Molecular Feature											100
TRUE	8	5.d						1.38	114.989	115.996									Negative	2	13438		129690		Find by Molecular Feature											100
TRUE	2	CPM0u_PB.d						1.413	114.99	115.997									Negative	2	14666		147307		Find by Molecular Feature											100
TRUE	1	CPM4u_PB.d						1.402	114.991	115.998									Negative	2	7257		50857		Find by Molecular Feature											82.4
TRUE	37	5.d						1.783	116.071	117.078									Negative	2	11111		57033		Find by Molecular Feature											100
TRUE	40	2.d	DBSearch	Valine	C5 H11 N O2			1.795	116.072	117.079	86.67		86.67				1.37		Negative	2	12263		48539	10	Find by Molecular Feature											96.5
TRUE	30	3.d	DBSearch	Valine	C5 H11 N O2			1.795	116.072	117.079	87.58		87.58				0.8		Negative	2	12559		74281	10	Find by Molecular Feature											100
TRUE	51	5.d	DBSearch	5-hydroxy valeric acid	C5 H10 O3			6.246	117.056	118.063	99.05		99.05				-0.21		Negative	3	14055		162806	10	Find by Molecular Feature											100
TRUE	56	4.d						6.26	117.056	118.064									Negative	3	13749		142156		Find by Molecular Feature											100
TRUE	47	3.d						6.239	117.056	118.064									Negative	2	14861		187246		Find by Molecular Feature											100
TRUE	67	1.d						6.265	117.057	118.064									Negative	2	12621		145532		Find by Molecular Feature											100
TRUE	59	2.d						6.247	117.057	118.064									Negative	2	11022		127437		Find by Molecular Feature											100
TRUE	15	CPM4u_PB.d						1.878	119.038	120.045									Negative	2	8619		91578		Find by Molecular Feature											87
TRUE	17	CPM4u_PB.d						2.024	119.038	120.045									Negative	2	6933		51856		Find by Molecular Feature											83.9
TRUE	29	CPM4u_PB.d						7.214	121.032	122.039									Negative	2	11620		103183		Find by Molecular Feature											100
TRUE	27	CPM0u_PB.d						7.213	121.032	122.039									Negative	2	28901		256280		Find by Molecular Feature											100
TRUE	53	4.d						2.544	124.016	125.023									Negative	2	6385		83251		Find by Molecular Feature											100
TRUE	44	3.d						2.522	124.016	125.023									Negative	2	5157		101280		Find by Molecular Feature											100
TRUE	14	CPM4u_PB.d						1.864	124.994	126.002									Negative	3	15202		113075		Find by Molecular Feature											85.8
TRUE	59	4.d	DBSearch	(R)-Pantolactone	C6 H10 O3			7.889	129.056	130.064	84.52		84.52				-4.91		Negative	2	10955		320735	10	Find by Molecular Feature											84.9
TRUE	62	2.d						7.827	129.056	130.064									Negative	2	13222		390361		Find by Molecular Feature											84.7
TRUE	1	3.d						1.343	130.966	131.974									Negative	3	15014		88602		Find by Molecular Feature											100
TRUE	3	1.d						1.346	130.967	131.974									Negative	3	23117		149773		Find by Molecular Feature											100
TRUE	2	5.d						1.346	130.967	131.974									Negative	3	19159		128327		Find by Molecular Feature											100
TRUE	4	2.d						1.345	130.967	131.975									Negative	3	17537		140464		Find by Molecular Feature											91.1
TRUE	33	CPM4u_PB.d	DBSearch	N-Methylformamide	C8 H9 N O			7.743	134.062	135.069	83.46		83.46				-3.9		Negative	2	17653		194687	10	Find by Molecular Feature											100
TRUE	33	CPM0u_PB.d						7.753	134.063	135.07									Negative	3	26801		331872		Find by Molecular Feature											99.3
TRUE	36	4.d	DBSearch	Threonate	C4 H8 O5			1.779	135.03	136.037	86.04		86.04				0.88		Negative	2	5849		90195	10	Find by Molecular Feature											98.5
TRUE	44	1.d	DBSearch	Threonate	C4 H8 O5			1.703	135.03	136.037	90.14		90.14				-2.54		Negative	3	5850		33985	10	Find by Molecular Feature											100
TRUE	11	CPM4u_PB.d						1.698	135.033	136.04									Negative	2	79677		543452		Find by Molecular Feature											93.1
TRUE	8	CPM0u_PB.d						1.663	135.034	136.041									Negative	4	55274		296337		Find by Molecular Feature											84.5
TRUE	7	CPM4u_PB.d	DBSearch	Isoglutamine	C5 H10 N2 O3			1.613	145.062	146.069	83.33		83.33				-1.39		Negative	2	7280		43445	10	Find by Molecular Feature											84.1
TRUE	30	CPM4u_PB.d						7.695	145.063	146.071									Negative	3	36779		353216		Find by Molecular Feature											100
TRUE	30	CPM0u_PB.d						7.699	145.064	146.071									Negative	3	61185		693764		Find by Molecular Feature											100
TRUE	50	1.d	DBSearch	N-Acetylserine	C5 H9 N O4			1.835	146.047	147.054	76.94		76.94				-2.09		Negative	2	7796		84012	10	Find by Molecular Feature											81.7
TRUE	30	4.d						1.677	146.047	147.054									Negative	2	6898		40660		Find by Molecular Feature											86.9
TRUE	24	CPM4u_PB.d	DBSearch	3-Methylthiopropanamine	C4 H11 N S			7.103	150.059	105.06	55.76		55.76				9.37		Negative	2	5829		56130	1	Find by Molecular Feature											100
TRUE	23	CPM0u_PB.d	DBSearch	3-Methylthiopropanamine	C4 H11 N S			7.099	150.059	105.061	67.08		67.08				4.22		Negative	2	16328		159973	1	Find by Molecular Feature											100
TRUE	9	CPM4u_PB.d	DBSearch	D-Arabitol	C5 H12 O5			1.633	151.061	152.068	79.88		79.88				2.96		Negative	2	6891		26636	9	Find by Molecular Feature											96.2
TRUE	73	1.d	DBSearch	(+)-trans-Carveol	C10 H16 O			9.494	151.113	152.12	86.73		86.73				-0.54		Negative	2	7890		77780	10	Find by Molecular Feature											100
TRUE	55	3.d	DBSearch	(+)-trans-Carveol	C10 H16 O			9.488	151.113	152.12	85.75		85.75				0.17		Negative	2	8137		82443	10	Find by Molecular Feature											100
TRUE	57	5.d	DBSearch	(+)-trans-Carveol	C10 H16 O			9.478	151.113	152.12	86.08		86.08				-0.56		Negative	2	7988		77101	10	Find by Molecular Feature											100
TRUE	62	4.d	DBSearch	(+)-trans-Carveol	C10 H16 O			9.486	151.113	152.121	85		85				-3.05		Negative	2	6535		66744	10	Find by Molecular Feature											100
TRUE	67	2.d	DBSearch	(+)-trans-Carveol	C10 H16 O			9.487	151.113	152.12	84.7		84.7				-2.5		Negative	2	7606		71574	10	Find by Molecular Feature											100
TRUE	6	CPM4u_PB.d	DBSearch	L-2-Amino-3-(1-pyrazolyl)propanoic acid	C6 H9 N3 O2			1.557	154.062	155.07	84.65		84.65				-1.79		Negative	2	8006		41466	8	Find by Molecular Feature											99.9
TRUE	6	CPM0u_PB.d	DBSearch	L-2-Amino-3-(1-pyrazolyl)propanoic acid	C6 H9 N3 O2			1.598	154.062	155.07	84.96		84.96				-1.7		Negative	2	13896		60630	8	Find by Molecular Feature											83.1
TRUE	8	4.d						1.421	158.978	159.986									Negative	2	21558		192965		Find by Molecular Feature											80
TRUE	10	1.d						1.409	158.979	159.986									Negative	2	31634		315160		Find by Molecular Feature											100
TRUE	10	2.d						1.406	158.979	159.986									Negative	2	24519		230887		Find by Molecular Feature											100
TRUE	9	3.d						1.401	158.979	159.986									Negative	2	20044		180796		Find by Molecular Feature											98.7
TRUE	9	5.d						1.406	158.979	159.987									Negative	3	26412		257173		Find by Molecular Feature											94.2
TRUE	3	CPM0u_PB.d						1.431	158.98	159.987									Negative	2	26440		250677		Find by Molecular Feature											100
TRUE	4	CPM4u_PB.d						1.413	158.981	159.989									Negative	2	10522		77280		Find by Molecular Feature											86.9
TRUE	62	1.d						2.409	160.844	161.851									Negative	5	11088		592082		Find by Molecular Feature											80
TRUE	55	4.d						5.759	164.073	165.08									Negative	2	5259		57844		Find by Molecular Feature											100
TRUE	46	3.d						5.741	164.073	165.08									Negative	2	5575		72547		Find by Molecular Feature											100
TRUE	15	CPM0u_PB.d	DBSearch	Thiocarbohydrazide	C H6 N4 S			6.044	165.045	106.032	88.37		88.37				-2.83		Negative	3	19977		224911	1	Find by Molecular Feature											100
TRUE	44	5.d	DBSearch	Uric acid	C5 H4 N4 O3			2.087	167.022	168.029	64.33		64.33				-6.45		Negative	2	6384		58489	1	Find by Molecular Feature											87
TRUE	49	5.d	DBSearch	Uric acid	C5 H4 N4 O3			2.527	167.022	168.029	96.35		96.35				-4.64		Negative	5	45893		959766	1	Find by Molecular Feature											100
TRUE	52	4.d						2.542	167.022	168.029									Negative	6	80645		1398894		Find by Molecular Feature											100
TRUE	57	2.d	DBSearch	2-chloro-N-nitroso-Ethanamine (Carmustine Metabolite)	C2 H5 Cl N2 O			2.526	167.022	108.008	68.82		68.82				4.87		Negative	5	34544		764780	1	Find by Molecular Feature											100
TRUE	43	3.d	DBSearch	2-chloro-N-nitroso-Ethanamine (Carmustine Metabolite)	C2 H5 Cl N2 O			2.519	167.022	108.009	69.94		69.94				4.05		Negative	4	67701		1532286	1	Find by Molecular Feature											100
TRUE	63	1.d	DBSearch	2-chloro-N-nitroso-Ethanamine (Carmustine Metabolite)	C2 H5 Cl N2 O			2.514	167.023	108.009	69.24		69.24				3.54		Negative	5	62265		1328807	1	Find by Molecular Feature											100
TRUE	19	CPM4u_PB.d						2.535	167.025	168.033									Negative	6	89501		1732566		Find by Molecular Feature											100
TRUE	12	CPM0u_PB.d						2.545	167.026	168.033									Negative	6	98786		3485616		Find by Molecular Feature											100
TRUE	52	3.d	DBSearch	4-Hydroxybenzenesulfonic acid	C6 H6 O4 S			8.162	172.992	173.999	94.34		94.34				-1.59		Negative	3	8421		88441	3	Find by Molecular Feature											100
TRUE	56	5.d	DBSearch	Phenyl sulfate	C6 H6 O4 S			8.172	172.992	173.999	96.26		96.26				-3.78		Negative	3	6917		80233	2	Find by Molecular Feature											100
TRUE	40	1.d	DBSearch	2,2-Dichloro-1,1-ethanediol	C2 H4 Cl2 O2			1.492	174.957	129.958	69.73		69.73				3.05		Negative	3	31339		236708	1	Find by Molecular Feature											87
TRUE	4	3.d	DBSearch	2,2-Dichloro-1,1-ethanediol	C2 H4 Cl2 O2			1.351	174.957	129.959	68.93		68.93				1.59		Negative	3	22966		169341	1	Find by Molecular Feature											92.5
TRUE	29	5.d	DBSearch	2,2-Dichloro-1,1-ethanediol	C2 H4 Cl2 O2			1.499	174.957	129.959	69.94		69.94				1.54		Negative	3	14896		108262	1	Find by Molecular Feature											86.6
TRUE	4	CPM0u_PB.d	DBSearch	2,2-Dichloro-1,1-ethanediol	C2 H4 Cl2 O2			1.48	174.957	129.959	68.11		68.11				1.04		Negative	3	15079		99369	1	Find by Molecular Feature											100
TRUE	3	2.d	DBSearch	2,2-Dichloro-1,1-ethanediol	C2 H4 Cl2 O2			1.344	174.957	129.959	69.8		69.8				0.74		Negative	3	26238		129160	1	Find by Molecular Feature											100
TRUE	31	2.d	DBSearch	2,2-Dichloro-1,1-ethanediol	C2 H4 Cl2 O2			1.477	174.957	129.959	70.95		70.95				0.98		Negative	3	18087		169244	1	Find by Molecular Feature											87
TRUE	4	5.d	DBSearch	2,2-Dichloro-1,1-ethanediol	C2 H4 Cl2 O2			1.354	174.957	129.959	68.24		68.24				0.33		Negative	3	27690		180792	1	Find by Molecular Feature											97.7
TRUE	32	CPM4u_PB.d						7.743	178.052	179.059									Negative	6	102852		1133198		Find by Molecular Feature											98.7
TRUE	32	CPM0u_PB.d						7.745	178.053	179.061									Negative	5	182406		2079518		Find by Molecular Feature											96.8
TRUE	12	CPM4u_PB.d	DBSearch	1,10-Phenanthroline	C12 H8 N2			1.715	179.061	180.068	71.3		71.3				5.11		Negative	2	20693		113443	1	Find by Molecular Feature											100
TRUE	9	CPM0u_PB.d	DBSearch	1,10-Phenanthroline	C12 H8 N2			1.737	179.061	180.068	75.69		75.69				3.83		Negative	2	12511		175249	1	Find by Molecular Feature											90.6
TRUE	27	2.d						1.47	180.973	181.98									Negative	2	8490		60945		Find by Molecular Feature											100
TRUE	20	3.d						1.466	180.973	181.981									Negative	2	7362		46062		Find by Molecular Feature											99.4
TRUE	25	4.d						1.483	180.973	181.981									Negative	2	7694		48332		Find by Molecular Feature											100
TRUE	22	5.d						1.473	180.973	181.981									Negative	2	8921		57772		Find by Molecular Feature											100
TRUE	35	1.d						1.479	180.974	181.981									Negative	2	11999		89920		Find by Molecular Feature											100
TRUE	28	CPM4u_PB.d	DBSearch	Diisopropyl sulfate	C6 H14 O4 S			7.21	181.054	182.061	71.7		71.7				-0.88		Negative	2	12574		117400	2	Find by Molecular Feature											98.5
TRUE	28	CPM0u_PB.d	DBSearch	Diisopropyl sulfate	C6 H14 O4 S			7.214	181.055	182.062	86.49		86.49				-4.79		Negative	3	33270		320991	1	Find by Molecular Feature											100
TRUE	8	CPM4u_PB.d	DBSearch	D-Mannitol	C6 H14 O6			1.62	181.072	182.079	98.43		98.43				-1.21		Negative	3	13194		62471	10	Find by Molecular Feature											97.4
TRUE	16	3.d						1.459	186.93	187.938									Negative	3	13657		51343		Find by Molecular Feature											92.5
TRUE	58	1.d						2.216	187.046	188.054									Negative	2	12477		108474		Find by Molecular Feature											100
TRUE	39	3.d						2.226	187.049	188.056									Negative	3	5787		54938		Find by Molecular Feature											100
TRUE	46	4.d						2.209	187.05	188.057									Negative	2	6619		66174		Find by Molecular Feature											100
TRUE	54	2.d	DBSearch	(-)-3-Cyanomethyl-3-hydroxy-1H-indol-2(3H)-one	C10 H8 N2 O2			2.221	187.051	188.058	72.41		72.41				4.52		Negative	2	8016		65628	2	Find by Molecular Feature											100
TRUE	37	CPM4u_PB.d	DBSearch	Nonate	C9 H16 O4			8.448	187.098	188.105	93.66		93.66				-2.3		Negative	3	7206		64401	10	Find by Molecular Feature											94.2
TRUE	39	CPM0u_PB.d						8.446	187.099	188.107									Negative	3	14395		127302		Find by Molecular Feature											88.3
TRUE	32	3.d	DBSearch	5-Dehydro-4-deoxy-D-glucarate	C6 H8 O7			1.901	191.02	192.027	84.2		84.2				0.72		Negative	2	12985		86386	10	Find by Molecular Feature											100
TRUE	48	2.d	DBSearch	(E)-1-Propenyl 2-propenyl disulfide	C6 H10 S2			2.102	191.021	146.023	67.29		67.29				-1.54		Negative	2	24783		251146	6	Find by Molecular Feature											100
TRUE	50	4.d	DBSearch	(E)-1-Propenyl 2-propenyl disulfide	C6 H10 S2			2.503	191.021	146.023	80.41		80.41				-2.68		Negative	3	71373		2313972	6	Find by Molecular Feature											89.8
TRUE	65	1.d	DBSearch	(E)-1-Propenyl 2-propenyl disulfide	C6 H10 S2			2.52	191.021	146.023	65		65				-4.75		Negative	2	64989		2324598	6	Find by Molecular Feature											82.8
TRUE	55	2.d	DBSearch	(E)-1-Propenyl 2-propenyl disulfide	C6 H10 S2			2.498	191.021	146.023	64.44		64.44				-4.69		Negative	2	50075		1583564	6	Find by Molecular Feature											94.8
TRUE	20	CPM4u_PB.d						2.656	191.024	192.032									Negative	3	45015		715718		Find by Molecular Feature											93.7
TRUE	13	CPM0u_PB.d						2.562	191.025	192.032									Negative	3	80217		1153692		Find by Molecular Feature											89.1
TRUE	22	CPM4u_PB.d	DBSearch	2-(N-morpholino)ethanesulfonic acid	C6 H13 N O4 S			6.771	194.049	195.057	72.51		72.51				-0.28		Negative	2	9985		89518	8	Find by Molecular Feature											100
TRUE	25	CPM4u_PB.d	DBSearch	2-(N-morpholino)ethanesulfonic acid	C6 H13 N O4 S			7.103	194.05	195.057	88.36		88.36				-2.76		Negative	5	32208		350809	8	Find by Molecular Feature											100
TRUE	24	CPM0u_PB.d	DBSearch	2-(N-morpholino)ethanesulfonic acid	C6 H13 N O4 S			7.101	194.05	195.057	87.67		87.67				-4.05		Negative	7	97766		1316902	8	Find by Molecular Feature											100
TRUE	18	CPM0u_PB.d						6.759	194.05	195.058									Negative	3	31731		282882		Find by Molecular Feature											100
TRUE	13	CPM4u_PB.d						1.795	194.951	195.958									Negative	4	32268		259647		Find by Molecular Feature											100
TRUE	10	CPM0u_PB.d						2.255	194.952	195.959									Negative	3	30118		538877		Find by Molecular Feature											85.4
TRUE	10	CPM4u_PB.d						1.694	195.054	196.062									Negative	3	19235		191421		Find by Molecular Feature											89.2
TRUE	7	CPM0u_PB.d						1.652	195.055	196.063									Negative	3	19718		107681		Find by Molecular Feature											92.9
TRUE	75	1.d	DBSearch	Benzenemethanol, 2-(2-hydroxypropoxy)-3-methyl-	C11 H16 O3			9.497	195.103	196.11	99.26		99.26				-1.51		Negative	3	53814		548050	10	Find by Molecular Feature											100
TRUE	59	5.d	DBSearch	Benzenemethanol, 2-(2-hydroxypropoxy)-3-methyl-	C11 H16 O3			9.483	195.103	196.11	98.76		98.76				-2.47		Negative	3	54247		552942	10	Find by Molecular Feature											100
TRUE	68	2.d	DBSearch	4-(2-hydroxypropoxy)-3,5-dimethyl-Phenol	C11 H16 O3			9.489	195.103	196.111	96.36		96.36				-4.3		Negative	3	54051		538310	5	Find by Molecular Feature											100
TRUE	53	3.d	DBSearch	4-(2-hydroxypropoxy)-3,5-dimethyl-Phenol	C11 H16 O3			9.484	195.103	196.111	96.41		96.41				-4.02		Negative	3	55160		549527	5	Find by Molecular Feature											100
TRUE	64	4.d	DBSearch	4-(2-hydroxypropoxy)-3,5-dimethyl-Phenol	C11 H16 O3			9.488	195.103	196.111	96.58		96.58				-4.26		Negative	3	44777		465777	5	Find by Molecular Feature											100
TRUE	16	CPM4u_PB.d						2.022	195.816	196.823									Negative	5	9607		417122		Find by Molecular Feature											80
TRUE	52	5.d						7.109	203.084	204.092									Negative	5	43564		369969		Find by Molecular Feature											100
TRUE	60	2.d						7.107	203.085	204.092									Negative	3	34459		259311		Find by Molecular Feature											100
TRUE	57	4.d						7.11	203.085	204.092									Negative	5	38315		330676		Find by Molecular Feature											100
TRUE	48	3.d						7.106	203.085	204.092									Negative	5	48945		432637		Find by Molecular Feature											100
TRUE	68	1.d						7.114	203.085	204.092									Negative	5	35286		256167		Find by Molecular Feature											100
TRUE	26	CPM0u_PB.d						7.201	207.001	208.008									Negative	2	15925		185021		Find by Molecular Feature											80
TRUE	51	3.d	DBSearch	4-Butoxyphenol	C10 H14 O2			8.144	211.098	166.1	99.31		99.31				-1		Negative	3	30336		241107	10	Find by Molecular Feature											100
TRUE	71	1.d	DBSearch	2-Methoxy-4-propylphenol	C10 H14 O2			8.15	211.098	166.1	97.26		97.26				-3.66		Negative	3	22998		185233	10	Find by Molecular Feature											100
TRUE	61	4.d	DBSearch	Chrysoidine free base	C12 H12 N4			8.142	211.098	212.106	95.61		95.61				2.57		Negative	3	23375		193996	2	Find by Molecular Feature											100
TRUE	55	5.d	DBSearch	Chrysoidine free base	C12 H12 N4			8.138	211.099	212.106	96.88		96.88				1.77		Negative	3	29678		243780	2	Find by Molecular Feature											100
TRUE	64	2.d	DBSearch	Chrysoidine free base	C12 H12 N4			8.145	211.099	212.106	97.99		97.99				0.17		Negative	3	23711		193813	2	Find by Molecular Feature											100
TRUE	26	3.d						1.663	215.034	216.041									Negative	4	20880		189938		Find by Molecular Feature											80
TRUE	45	1.d	DBSearch	8-MOP / 8-Methoxypsoralen	C12 H8 O4			1.729	215.034	216.039	32.74		32.74				14.46		Negative	5	40448		742532	6	Find by Molecular Feature											91.8
TRUE	39	5.d	DBSearch	8-MOP / 8-Methoxypsoralen	C12 H8 O4			1.831	215.034	216.039	32.37		32.37				14.43		Negative	4	25023		443752	6	Find by Molecular Feature											87
TRUE	35	2.d	DBSearch	8-MOP / 8-Methoxypsoralen	C12 H8 O4			1.673	215.034	216.039	36.18		36.18				13.09		Negative	3	26773		195636	6	Find by Molecular Feature											80
TRUE	32	5.d	DBSearch	8-MOP / 8-Methoxypsoralen	C12 H8 O4			1.667	215.035	216.04	44.75		44.75				9.89		Negative	5	21771		195256	6	Find by Molecular Feature											80
TRUE	31	4.d						1.686	217.031	218.038									Negative	2	9228		66676		Find by Molecular Feature											100
TRUE	16	CPM0u_PB.d						6.226	218.108	219.115									Negative	2	11112		109069		Find by Molecular Feature											100
TRUE	27	CPM4u_PB.d						7.184	224.061	225.068									Negative	2	5650		57722		Find by Molecular Feature											100
TRUE	20	CPM0u_PB.d	DBSearch	4,4'-dihydroxy-alpha-methylstilbene	C15 H14 O2			6.802	225.093	226.1	80.65		80.65				-3.39		Negative	2	11514		117921	10	Find by Molecular Feature											100
TRUE	10	5.d						1.435	226.966	227.973									Negative	3	12073		80633		Find by Molecular Feature											86.2
TRUE	11	3.d						1.431	226.966	227.974									Negative	3	11156		60391		Find by Molecular Feature											90.9
TRUE	9	4.d						1.446	226.966	227.974									Negative	3	11172		74706		Find by Molecular Feature											95.2
TRUE	11	1.d						1.444	226.966	227.974									Negative	4	15109		117910		Find by Molecular Feature											97.4
TRUE	11	2.d						1.438	226.967	227.974									Negative	3	11043		82595		Find by Molecular Feature											100
TRUE	26	CPM4u_PB.d						7.104	228.001	229.009									Negative	3	10578		163768		Find by Molecular Feature											100
TRUE	22	CPM0u_PB.d						7.067	228.002	229.009									Negative	2	20421		354995		Find by Molecular Feature											86.6
TRUE	34	2.d						1.534	238.932	239.939									Negative	3	6893		46005		Find by Molecular Feature											100
TRUE	42	1.d						1.548	238.932	239.94									Negative	3	8109		68373		Find by Molecular Feature											93.9
TRUE	28	4.d						1.547	238.932	239.94									Negative	3	5581		42165		Find by Molecular Feature											93.4
TRUE	74	1.d	DBSearch	2-Hydroxy-3-(4-methoxyethylphenoxy)-propanoic acid	C12 H16 O5			9.496	239.093	240.101	97.7		97.7				-3.05		Negative	4	198479		2012007	10	Find by Molecular Feature											100
TRUE	58	5.d	DBSearch	2-Hydroxy-3-(4-methoxyethylphenoxy)-propanoic acid	C12 H16 O5			9.479	239.093	240.1	98.03		98.03				-2.77		Negative	4	200933		1974299	10	Find by Molecular Feature											100
TRUE	54	3.d	DBSearch	3-carboxy-4-methyl-5-propyl-2-furanpropanoic acid	C12 H16 O5			9.484	239.094	240.101	96.2		96.2				-3.94		Negative	4	204391		2032115	10	Find by Molecular Feature											100
TRUE	66	2.d	DBSearch	3-carboxy-4-methyl-5-propyl-2-furanpropanoic acid	C12 H16 O5			9.487	239.094	240.101	94.81		94.81				-4.59		Negative	5	201366		1928232	6	Find by Molecular Feature											100
TRUE	63	4.d	DBSearch	3-carboxy-4-methyl-5-propyl-2-furanpropanoic acid	C12 H16 O5			9.487	239.094	240.101	95.02		95.02				-4.56		Negative	4	165051		1641502	6	Find by Molecular Feature											100
TRUE	72	1.d	DBSearch	(5-Ethyl-6-methyloctahydroindolizin-8-yl)methanol	C12 H23 N O			9.185	242.177	197.179	84.04		84.04				-3.73		Negative	2	7300		61774	5	Find by Molecular Feature											100
TRUE	65	2.d						9.179	242.177	243.185									Negative	2	5151		40893		Find by Molecular Feature											100
TRUE	26	4.d						1.493	242.943	243.951									Negative	2	5524		44165		Find by Molecular Feature											100
TRUE	26	5.d						1.477	242.943	243.951									Negative	2	5227		46849		Find by Molecular Feature											100
TRUE	36	1.d						1.48	242.944	243.951									Negative	3	11956		99613		Find by Molecular Feature											100
TRUE	22	2.d						1.467	242.944	243.952									Negative	2	6637		52353		Find by Molecular Feature											100
TRUE	18	CPM4u_PB.d						2.249	243.068	244.075									Negative	2	6058		65738		Find by Molecular Feature											98.6
TRUE	23	5.d						1.474	248.961	249.968									Negative	3	23949		158464		Find by Molecular Feature											99.7
TRUE	22	3.d						1.467	248.961	249.968									Negative	3	21113		123800		Find by Molecular Feature											99.2
TRUE	17	4.d						1.476	248.961	249.968									Negative	3	21588		120599		Find by Molecular Feature											100
TRUE	28	2.d						1.47	248.961	249.968									Negative	3	24918		168415		Find by Molecular Feature											100
TRUE	34	1.d						1.479	248.961	249.968									Negative	3	37644		254040		Find by Molecular Feature											100
TRUE	18	5.d						1.469	254.919	255.926									Negative	3	10856		53662		Find by Molecular Feature											95.5
TRUE	13	4.d						1.47	254.919	255.926									Negative	3	9918		46321		Find by Molecular Feature											100
TRUE	21	3.d						1.467	254.919	255.927									Negative	3	14784		67224		Find by Molecular Feature											94.1
TRUE	32	2.d						1.489	254.923	255.93									Negative	2	6492		28277		Find by Molecular Feature											100
TRUE	50	3.d	DBSearch	Phenylglucoside	C12 H16 O6			8.141	255.088	256.095	99.72		99.72				-0.66		Negative	7	151506		1203587	10	Find by Molecular Feature											100
TRUE	70	1.d	DBSearch	Phenylglucoside	C12 H16 O6			8.148	255.088	256.096	97.4		97.4				-3.17		Negative	6	101322		851463	10	Find by Molecular Feature											100
TRUE	60	4.d	DBSearch	Phenylglucoside	C12 H16 O6			8.142	255.088	256.096	96.77		96.77				-3.49		Negative	6	115648		926383	10	Find by Molecular Feature											100
TRUE	54	5.d	DBSearch	Phenylglucoside	C12 H16 O6			8.136	255.089	256.096	94.5		94.5				-4.61		Negative	7	148303		1193159	3	Find by Molecular Feature											98.6
TRUE	63	2.d						8.143	255.089	256.096									Negative	7	117075		942721		Find by Molecular Feature											100
TRUE	58	4.d	DBSearch	AFMK	C13 H16 N2 O4			7.664	263.104	264.111	85.41		85.41				-1.8		Negative	2	5008		43922	10	Find by Molecular Feature											100
TRUE	53	5.d	DBSearch	AFMK	C13 H16 N2 O4			7.66	263.104	264.112	80.64		80.64				-3.27		Negative	2	5899		48346	10	Find by Molecular Feature											99.3
TRUE	69	1.d						7.667	263.105	264.112									Negative	2	6043		48365		Find by Molecular Feature											100
TRUE	49	3.d						7.66	263.105	264.112									Negative	2	7131		62623		Find by Molecular Feature											100
TRUE	61	2.d						7.661	263.106	264.113									Negative	2	6143		47558		Find by Molecular Feature											100
TRUE	31	CPM0u_PB.d	DBSearch	Thiofanox	C9 H18 N2 O2 S			7.699	263.106	218.108	91.36		91.36				2.22		Negative	9	437880		8256818	3	Find by Molecular Feature											100
TRUE	31	CPM4u_PB.d	DBSearch	Thiofanox	C9 H18 N2 O2 S			7.697	263.106	218.108	90.65		90.65				2.49		Negative	8	225263		3158328	3	Find by Molecular Feature											100
TRUE	11	CPM0u_PB.d	DBSearch	Chloroneb	C8 H8 Cl2 O2			2.437	265.004	205.99	70.29		70.29				1.71		Negative	3	12884		134192	1	Find by Molecular Feature											100
TRUE	61	5.d	DBSearch	Kamahine C	C14 H20 O5			10.257	267.124	268.132	92.09		92.09				-1.51		Negative	3	10176		109754	10	Find by Molecular Feature											100
TRUE	72	2.d	DBSearch	Kamahine C	C14 H20 O5			10.262	267.124	268.131	93.3		93.3				-1.31		Negative	3	11568		117981	10	Find by Molecular Feature											100
TRUE	65	4.d	DBSearch	Kamahine C	C14 H20 O5			10.259	267.124	268.131	85.86		85.86				-0.9		Negative	3	8291		87536	10	Find by Molecular Feature											100
TRUE	78	1.d	DBSearch	Kamahine C	C14 H20 O5			10.269	267.124	268.132	87.41		87.41				-1.49		Negative	3	11415		124232	10	Find by Molecular Feature											100
TRUE	59	3.d	DBSearch	DMABA-d6 NHS ester	C13 H8 D6 N2 O4			10.259	267.125	268.132	89.14		89.14				2.99		Negative	3	11739		119344	8	Find by Molecular Feature											96.7
TRUE	7	3.d	DBSearch	Ribose-1-arsenate	C5 H11 As O8			1.365	272.959	273.964	38.47		38.47				9.01		Negative	4	7978		67478	1	Find by Molecular Feature											100
TRUE	7	4.d	DBSearch	Ribose-1-arsenate	C5 H11 As O8			1.381	272.959	273.965	40.81		40.81				8.03		Negative	3	6326		58717	1	Find by Molecular Feature											97.2
TRUE	8	1.d	DBSearch	Ribose-1-arsenate	C5 H11 As O8			1.371	272.959	273.964	34.25		34.25				9.63		Negative	4	13135		119881	1	Find by Molecular Feature											96.3
TRUE	7	5.d	DBSearch	Ribose-1-arsenate	C5 H11 As O8			1.368	272.96	273.965	45.39		45.39				6.5		Negative	4	9899		92255	1	Find by Molecular Feature											99
TRUE	8	2.d	DBSearch	Ribose-1-arsenate	C5 H11 As O8			1.371	272.96	273.965	42.43		42.43				6.95		Negative	4	8747		84323	1	Find by Molecular Feature											99
TRUE	1	CPM0u_PB.d						1.404	272.964	273.971									Negative	4	20828		190338		Find by Molecular Feature											100
TRUE	2	CPM4u_PB.d						1.403	272.965	273.973									Negative	4	7833		51538		Find by Molecular Feature											81.4
TRUE	17	CPM0u_PB.d						6.679	279.104	280.111									Negative	3	11262		93202		Find by Molecular Feature											100
TRUE	81	5.d	DBSearch	5Z-octadecenoic acid	C18 H34 O2			14.362	281.249	282.256	85.23		85.23				-1.81		Negative	5	5857		132935	10	Find by Molecular Feature											100
TRUE	100	1.d	DBSearch	5Z-octadecenoic acid	C18 H34 O2			14.364	281.25	282.257	92.67		92.67				-3.79		Negative	6	6075		154981	10	Find by Molecular Feature											100
TRUE	34	CPM4u_PB.d	DBSearch	p-Cresol glucuronide	C13 H16 O7			8.061	283.082	284.09	85.18		85.18				-0.5		Negative	2	11021		92407	10	Find by Molecular Feature											94.1
TRUE	36	CPM0u_PB.d	DBSearch	Psilocybin	C12 H17 N2 O4 P			8.063	283.086	284.094	90.97		90.97				-4.31		Negative	5	16626		169885	4	Find by Molecular Feature											93.5
TRUE	5	4.d						1.363	288.936	289.943									Negative	4	11109		84777		Find by Molecular Feature											80
TRUE	6	1.d						1.358	288.937	289.944									Negative	4	28554		212620		Find by Molecular Feature											100
TRUE	5	3.d						1.353	288.937	289.944									Negative	4	17337		107890		Find by Molecular Feature											100
TRUE	6	2.d						1.354	288.937	289.945									Negative	4	20308		140731		Find by Molecular Feature											100
TRUE	5	5.d						1.356	288.937	289.945									Negative	4	20782		143380		Find by Molecular Feature											97
TRUE	3	CPM4u_PB.d						1.409	288.941	289.949									Negative	3	6008		36239		Find by Molecular Feature											88
TRUE	58	3.d	DBSearch	Tanacetol A	C17 H26 O4			10.176	293.175	294.183	96.61		96.61				0.91		Negative	3	6005		59686	10	Find by Molecular Feature											100
TRUE	60	5.d	DBSearch	Tanacetol A	C17 H26 O4			10.174	293.176	294.183	96.86		96.86				-0.12		Negative	3	6193		67578	10	Find by Molecular Feature											100
TRUE	77	1.d	DBSearch	Tanacetol A	C17 H26 O4			10.186	293.176	294.184	98.06		98.06				-2.18		Negative	6	36778		439492	10	Find by Molecular Feature											100
TRUE	71	2.d	DBSearch	Tanacetol A	C17 H26 O4			10.177	293.177	294.184	97.74		97.74				-2.33		Negative	6	30348		346380	10	Find by Molecular Feature											100
TRUE	13	2.d	DBSearch	(2R)-O-Phospho-3-sulfolactate	C3 H7 O9 P S			1.441	294.954	249.955	69.93		69.93				-1.81		Negative	3	7196		54965	1	Find by Molecular Feature											100
TRUE	13	1.d	DBSearch	(2R)-O-Phospho-3-sulfolactate	C3 H7 O9 P S			1.447	294.954	249.956	71.1		71.1				-2.83		Negative	3	10323		77510	1	Find by Molecular Feature											98.2
TRUE	11	5.d	DBSearch	(2R)-O-Phospho-3-sulfolactate	C3 H7 O9 P S			1.441	294.954	249.956	66.25		66.25				-2.5		Negative	3	7618		51832	1	Find by Molecular Feature											97
TRUE	12	3.d	DBSearch	(2R)-O-Phospho-3-sulfolactate	C3 H7 O9 P S			1.432	294.954	249.956	65.26		65.26				-3.24		Negative	3	7514		39770	1	Find by Molecular Feature											81.7
TRUE	11	4.d						1.452	294.954	295.962									Negative	3	7201		50341		Find by Molecular Feature											96.6
TRUE	2	4.d						1.235	300.005	301.012									Negative	2	7117		93365		Find by Molecular Feature											87
TRUE	46	1.d	DBSearch	Lamotrigine	C9 H7 Cl2 N5			1.734	300.006	255.008	57.58		57.58				-0.14		Negative	2	5722		27369	1	Find by Molecular Feature											100
TRUE	34	CPM0u_PB.d	DBSearch	Gly Met Pro	C12 H21 N3 O4 S			7.92	302.119	303.127	86.5		86.5				-4.51		Negative	3	11026		97555	7	Find by Molecular Feature											97.3
TRUE	19	CPM0u_PB.d						6.794	303.078	304.086									Negative	4	12796		120264		Find by Molecular Feature											100
TRUE	3	4.d						1.351	304.913	305.921									Negative	3	6935		36484		Find by Molecular Feature											100
TRUE	2	1.d						1.346	304.914	305.921									Negative	3	22282		120825		Find by Molecular Feature											100
TRUE	1	5.d						1.343	304.914	305.921									Negative	3	16467		77436		Find by Molecular Feature											96.7
TRUE	2	3.d						1.344	304.915	305.922									Negative	3	12748		65110		Find by Molecular Feature											100
TRUE	1	2.d						1.343	304.915	305.922									Negative	2	14315		71329		Find by Molecular Feature											100
TRUE	27	4.d						1.536	306.918	307.925									Negative	3	5761		41058		Find by Molecular Feature											89.5
TRUE	33	2.d						1.531	306.919	307.926									Negative	3	5740		38867		Find by Molecular Feature											96.9
TRUE	41	1.d						1.541	306.919	307.927									Negative	3	8537		62625		Find by Molecular Feature											96.9
TRUE	30	5.d						1.532	306.919	307.927									Negative	3	6662		43944		Find by Molecular Feature											81.4
TRUE	29	1.d						1.474	310.931	311.939									Negative	3	8574		66733		Find by Molecular Feature											100
TRUE	34	4.d	DBSearch	Valdecoxib	C16 H14 N2 O3 S			1.773	313.064	314.072	71.76		71.76				2.42		Negative	5	30041		275757	1	Find by Molecular Feature											97.9
TRUE	48	1.d	DBSearch	Valdecoxib	C16 H14 N2 O3 S			1.743	313.065	314.073	70.05		70.05				-0.58		Negative	2	6725		36029	1	Find by Molecular Feature											100
TRUE	38	2.d	DBSearch	Valdecoxib	C16 H14 N2 O3 S			1.726	313.065	314.072	82.17		82.17				1.27		Negative	6	34055		280036	1	Find by Molecular Feature											100
TRUE	29	3.d	DBSearch	Valdecoxib	C16 H14 N2 O3 S			1.71	313.065	314.072	79.64		79.64				0.22		Negative	6	25039		243082	1	Find by Molecular Feature											100
TRUE	36	5.d	DBSearch	Valdecoxib	C16 H14 N2 O3 S			1.72	313.066	314.073	86.48		86.48				-0.34		Negative	6	33543		277117	1	Find by Molecular Feature											100
TRUE	46	5.d	DBSearch	Valdecoxib	C16 H14 N2 O3 S			2.106	313.066	314.073	71.49		71.49				-1.52		Negative	6	50530		1777038	1	Find by Molecular Feature											100
TRUE	45	4.d	DBSearch	Valdecoxib	C16 H14 N2 O3 S			2.157	313.066	314.073	70.77		70.77				-2.24		Negative	6	56784		1799926	1	Find by Molecular Feature											100
TRUE	57	1.d	DBSearch	Ser-Ser-OH	C12 H14 N2 O8			2.159	313.066	314.074	78.16		78.16				4.79		Negative	4	53101		1538333	2	Find by Molecular Feature											100
TRUE	49	2.d	DBSearch	Ser-Ser-OH	C12 H14 N2 O8			2.104	313.066	314.073	76.49		76.49				5.2		Negative	6	50149		1348160	2	Find by Molecular Feature											100
TRUE	38	3.d	DBSearch	Ser-Ser-OH	C12 H14 N2 O8			2.184	313.066	314.074	79.36		79.36				4.32		Negative	4	45808		1895450	6	Find by Molecular Feature											100
TRUE	59	1.d	DBSearch	Gly-Ser-OH	C10 H10 N2 O7			2.216	315.046	270.048	81.89		81.89				3.09		Negative	2	5618		69518	1	Find by Molecular Feature											80.6
TRUE	19	3.d	DBSearch	Mitotane	C14 H10 Cl4			1.465	316.948	317.955	63.93		63.93				-4.47		Negative	3	18133		104167	3	Find by Molecular Feature											95.1
TRUE	20	4.d	DBSearch	Mitotane	C14 H10 Cl4			1.477	316.948	317.955	64.06		64.06				-4.87		Negative	3	18349		109206	3	Find by Molecular Feature											100
TRUE	20	5.d	DBSearch	Mitotane	C14 H10 Cl4			1.472	316.948	317.955	57.59		57.59				-5.87		Negative	3	20324		126594	3	Find by Molecular Feature											100
TRUE	23	2.d						1.468	316.948	317.955									Negative	3	22328		145589		Find by Molecular Feature											100
TRUE	33	1.d						1.477	316.948	317.955									Negative	3	32398		220398		Find by Molecular Feature											100
TRUE	14	CPM0u_PB.d	DBSearch	Fenirofibrate	C17 H17 Cl O4			4.892	319.073	320.081	64.87		64.87				2.68		Negative	3	11077		232044	2	Find by Molecular Feature											85.9
TRUE	24	5.d						1.475	322.906	323.913									Negative	3	7126		39196		Find by Molecular Feature											97.6
TRUE	22	4.d						1.479	322.907	323.914									Negative	3	5556		32394		Find by Molecular Feature											100
TRUE	23	3.d						1.469	322.907	323.914									Negative	3	8832		43201		Find by Molecular Feature											99.9
TRUE	25	CPM0u_PB.d						7.159	324.077	325.084									Negative	4	12001		134855		Find by Molecular Feature											87.4
TRUE	36	2.d	DBSearch	Sulfamethizole	C9 H10 N4 O2 S2			1.723	329.038	270.025	88.47		88.47				-0.44		Negative	3	6605		47993	1	Find by Molecular Feature											100
TRUE	34	5.d	DBSearch	Sulfamethizole	C9 H10 N4 O2 S2			1.714	329.038	270.025	94.98		94.98				-0.96		Negative	3	5451		41367	2	Find by Molecular Feature											100
TRUE	45	5.d	DBSearch	Sulfamethizole	C9 H10 N4 O2 S2			2.103	329.039	270.025	96.17		96.17				-1.49		Negative	3	6768		132993	2	Find by Molecular Feature											100
TRUE	43	4.d	DBSearch	Sulfamethizole	C9 H10 N4 O2 S2			2.145	329.039	270.026	88.8		88.8				-3.74		Negative	3	8945		198658	2	Find by Molecular Feature											100
TRUE	56	1.d	DBSearch	Sulfamethizole	C9 H10 N4 O2 S2			2.151	329.039	270.026	91.83		91.83				-4.04		Negative	4	10271		242904	2	Find by Molecular Feature											100
TRUE	37	3.d	DBSearch	Sulfamethizole	C9 H10 N4 O2 S2			2.176	329.039	270.026	91.82		91.82				-4.37		Negative	3	7009		178085	2	Find by Molecular Feature											100
TRUE	47	2.d	DBSearch	Sulfamethizole	C9 H10 N4 O2 S2			2.102	329.039	270.026	87.15		87.15				-4.83		Negative	3	8820		164751	2	Find by Molecular Feature											100
TRUE	40	CPM0u_PB.d	DBSearch	(1R,3S,4S)-1,8-Epoxy-p-menthan-3-ol glucoside	C16 H28 O7			9.122	331.176	332.184	99.07		99.07				-0.58		Negative	3	27134		287581	10	Find by Molecular Feature											88.9
TRUE	49	1.d	DBSearch	Chlorpropamide	C10 H13 Cl N2 O3 S			1.745	335.046	276.033	52.7		52.7				3.89		Negative	2	5530		24850	1	Find by Molecular Feature											99.7
TRUE	35	4.d	DBSearch	Chlorpropamide	C10 H13 Cl N2 O3 S			1.778	335.047	276.033	67.02		67.02				1.29		Negative	6	17794		191388	1	Find by Molecular Feature											94.2
TRUE	28	3.d	DBSearch	Chlorpropamide	C10 H13 Cl N2 O3 S			1.701	335.047	276.033	70.14		70.14				1.04		Negative	6	15431		198793	1	Find by Molecular Feature											96.8
TRUE	37	2.d	DBSearch	Chlorpropamide	C10 H13 Cl N2 O3 S			1.725	335.047	276.034	67.82		67.82				0.11		Negative	6	18616		193232	1	Find by Molecular Feature											100
TRUE	35	5.d	DBSearch	Chlorpropamide	C10 H13 Cl N2 O3 S			1.714	335.047	276.034	69.71		69.71				0.19		Negative	6	20624		216028	1	Find by Molecular Feature											100
TRUE	42	5.d	DBSearch	Chlorpropamide	C10 H13 Cl N2 O3 S			2.046	335.048	276.034	69.3		69.3				-0.91		Negative	6	22910		412607	1	Find by Molecular Feature											100
TRUE	44	2.d	DBSearch	Chlorpropamide	C10 H13 Cl N2 O3 S			2.048	335.048	276.034	68.1		68.1				-1.5		Negative	6	20153		318521	1	Find by Molecular Feature											100
TRUE	54	1.d	DBSearch	Chlorpropamide	C10 H13 Cl N2 O3 S			2.086	335.048	276.034	69.22		69.22				-1.42		Negative	4	18649		324795	1	Find by Molecular Feature											100
TRUE	42	2.d	DBSearch	Chlorpropamide	C10 H13 Cl N2 O3 S			1.87	335.048	276.034	67.44		67.44				-2.29		Negative	5	13739		139902	1	Find by Molecular Feature											89.7
TRUE	41	4.d	DBSearch	Chlorpropamide	C10 H13 Cl N2 O3 S			2.077	335.048	276.034	66.39		66.39				-3.01		Negative	6	22058		422004	1	Find by Molecular Feature											100
TRUE	35	3.d	DBSearch	Chlorpropamide	C10 H13 Cl N2 O3 S			2.09	335.048	276.034	56.4		56.4				-3.31		Negative	3	19152		416835	1	Find by Molecular Feature											100
TRUE	33	4.d						1.748	343.994	345.001									Negative	2	25911		93101		Find by Molecular Feature											84.3
TRUE	1	4.d						0.604	343.995	345.002									Negative	3	62124		503820		Find by Molecular Feature											82.5
TRUE	35	CPM4u_PB.d	DBSearch	Ascorbigen	C15 H15 N O6			8.188	350.09	305.091	74.79		74.79				-3.79		Negative	2	6771		65055	3	Find by Molecular Feature											100
TRUE	37	CPM0u_PB.d	DBSearch	Prontosil	C12 H13 N5 O2 S			8.183	350.092	291.078	86.68		86.68				4.2		Negative	5	12755		124844	6	Find by Molecular Feature											100
TRUE	43	2.d	DBSearch	Bisphenol A bis(chloroformate)	C17 H14 Cl2 O4			2.009	351.02	352.028	69.19		69.19				-1.88		Negative	4	6851		125760	1	Find by Molecular Feature											95.3
TRUE	40	4.d	DBSearch	Bisphenol A bis(chloroformate)	C17 H14 Cl2 O4			2.073	351.021	352.028	64.8		64.8				-4.03		Negative	4	6746		109993	1	Find by Molecular Feature											98.1
TRUE	53	1.d						2.079	351.022	352.029									Negative	3	7020		111799		Find by Molecular Feature											100
TRUE	34	3.d						2.08	351.022	352.029									Negative	2	5633		87892		Find by Molecular Feature											80
TRUE	98	1.d						14.101	355.158	356.165									Negative	2	8310		137630		Find by Molecular Feature											100
TRUE	37	4.d						1.79	357.029	358.036									Negative	3	8040		81790		Find by Molecular Feature											99.7
TRUE	52	1.d						2.039	357.029	358.036									Negative	2	6484		83620		Find by Molecular Feature											100
TRUE	27	3.d						1.685	357.029	358.036									Negative	5	9214		113973		Find by Molecular Feature											97.3
TRUE	41	5.d						2.016	357.029	358.036									Negative	5	9340		132136		Find by Molecular Feature											100
TRUE	38	4.d	DBSearch	α-Hydroxytriazolam	C17 H12 Cl2 N4 O			2.031	357.03	358.037	50.08		50.08				4.75		Negative	3	7940		119152	2	Find by Molecular Feature											100
TRUE	33	3.d	DBSearch	α-Hydroxytriazolam	C17 H12 Cl2 N4 O			2.04	357.03	358.038	62.06		62.06				3.18		Negative	5	7977		119343	2	Find by Molecular Feature											100
TRUE	23	CPM4u_PB.d	DBSearch	Quinacridone	C20 H12 N2 O2			6.82	357.088	312.09	88.62		88.62				-1.31		Negative	3	7754		73432	3	Find by Molecular Feature											100
TRUE	21	CPM0u_PB.d	DBSearch	D-Pantetheine 4'-phosphate	C11 H23 N2 O7 P S			6.816	357.09	358.097	83.51		83.51				-2.98		Negative	3	25761		254691	2	Find by Molecular Feature											100
TRUE	10	3.d						1.43	362.939	363.947									Negative	3	9051		46787		Find by Molecular Feature											84.6
TRUE	12	1.d						1.445	362.941	363.948									Negative	4	12813		89115		Find by Molecular Feature											95.9
TRUE	12	2.d						1.44	362.941	363.948									Negative	3	9674		60600		Find by Molecular Feature											100
TRUE	10	4.d						1.452	362.941	363.948									Negative	4	8142		55270		Find by Molecular Feature											89.2
TRUE	12	5.d						1.441	362.942	363.949									Negative	3	9370		59686		Find by Molecular Feature											85.1
TRUE	89	2.d	DBSearch	Testosterone sulfate	C19 H28 O5 S			12.169	367.159	368.166	71.23		71.23				-1.78		Negative	2	5316		184832	3	Find by Molecular Feature											89.5
TRUE	25	2.d						1.469	378.917	379.925									Negative	3	6956		47282		Find by Molecular Feature											100
TRUE	19	4.d						1.477	378.918	379.925									Negative	3	5117		38151		Find by Molecular Feature											99.7
TRUE	27	1.d						1.47	378.918	379.926									Negative	3	10350		83598		Find by Molecular Feature											100
TRUE	35	CPM0u_PB.d	DBSearch	Met Lys Gly	C13 H26 N4 O4 S			7.987	379.167	334.169	90.38		90.38				-3.9		Negative	4	13018		126894	10	Find by Molecular Feature											100
TRUE	101	1.d	DBSearch	S-Japonin	C19 H28 O3 S			14.437	381.174	336.176	85.95		85.95				-0.04		Negative	4	15181		204152	1	Find by Molecular Feature											84.3
TRUE	99	1.d	DBSearch	S-Japonin	C19 H28 O3 S			14.318	381.175	336.176	85.16		85.16				-1.5		Negative	4	15483		116566	2	Find by Molecular Feature											83.7
TRUE	21	2.d						1.466	384.934	385.941									Negative	3	12947		80753		Find by Molecular Feature											100
TRUE	18	4.d						1.477	384.935	385.942									Negative	3	10444		62523		Find by Molecular Feature											100
TRUE	18	3.d						1.46	384.935	385.942									Negative	3	9253		53858		Find by Molecular Feature											91.7
TRUE	19	5.d						1.469	384.935	385.942									Negative	3	11880		72229		Find by Molecular Feature											100
TRUE	31	1.d						1.474	384.935	385.943									Negative	3	18520		122083		Find by Molecular Feature											97.7
TRUE	25	3.d						1.472	390.894	391.902									Negative	3	5565		28503		Find by Molecular Feature											100
TRUE	40	5.d						2.016	393.005	394.012									Negative	5	5835		93009		Find by Molecular Feature											100
TRUE	39	4.d						2.037	393.006	394.013									Negative	4	5268		83347		Find by Molecular Feature											100
TRUE	29	CPM0u_PB.d	DBSearch	Citalopram-N-Oxide	C20 H21 F N2 O2			7.574	399.173	340.159	80.02		80.02				-2.29		Negative	2	12397		120197	5	Find by Molecular Feature											100
TRUE	55	1.d						2.124	401.954	402.961									Negative	4	5972		150797		Find by Molecular Feature											100
TRUE	6	3.d						1.355	402.916	403.923									Negative	3	6553		41564		Find by Molecular Feature											84.4
TRUE	7	1.d						1.363	402.916	403.924									Negative	5	11255		90908		Find by Molecular Feature											89.7
TRUE	6	5.d						1.359	402.917	403.924									Negative	5	8312		70152		Find by Molecular Feature											82
TRUE	7	2.d						1.358	402.917	403.924									Negative	3	8033		54321		Find by Molecular Feature											82.7
TRUE	36	CPM4u_PB.d	DBSearch	Tyr Pro Gln	C19 H26 N4 O6			8.287	405.178	406.185	94.64		94.64				-0.16		Negative	3	13739		150653	10	Find by Molecular Feature											92.1
TRUE	38	CPM0u_PB.d	DBSearch	Met Glu Lys	C16 H30 N4 O6 S			8.286	405.181	406.188	96.22		96.22				0.15		Negative	3	25215		269456	10	Find by Molecular Feature											95.6
TRUE	4	4.d						1.354	418.894	419.901									Negative	3	5069		26941		Find by Molecular Feature											87.8
TRUE	4	1.d						1.351	418.894	419.901									Negative	3	15533		84754		Find by Molecular Feature											88.6
TRUE	3	3.d						1.348	418.895	419.902									Negative	3	7682		44396		Find by Molecular Feature											84.9
TRUE	3	5.d						1.349	418.895	419.902									Negative	4	10465		61527		Find by Molecular Feature											80.6
TRUE	5	2.d						1.35	418.895	419.902									Negative	3	9738		56519		Find by Molecular Feature											86.6
TRUE	38	CPM4u_PB.d	DBSearch	7α-(Thiomethyl)spironolactone	C23 H32 O3 S			8.629	433.206	388.208	94.35		94.35				-2.29		Negative	3	6738		89639	10	Find by Molecular Feature											97.5
TRUE	1	1.d						1.344	434.869	435.877									Negative	3	8465		42081		Find by Molecular Feature											87.6
TRUE	2	2.d						1.344	434.87	435.878									Negative	3	5864		29445		Find by Molecular Feature											87.9
TRUE	28	1.d						1.47	446.906	447.913									Negative	3	6517		47806		Find by Molecular Feature											100
TRUE	76	1.d	DBSearch	N-(3α,12α-dihydroxy-5β-cholan-24-oyl)-glycine	C26 H43 N O5			9.82	448.307	449.315	98.55		98.55				-1.14		Negative	5	12725		228993	10	Find by Molecular Feature											100
TRUE	69	2.d	DBSearch	N-(3α,12α-dihydroxy-5β-cholan-24-oyl)-glycine	C26 H43 N O5			9.764	448.307	449.315	97.92		97.92				-1.14		Negative	5	15169		112282	10	Find by Molecular Feature											86.9
TRUE	70	2.d	DBSearch	N-(3α,12α-dihydroxy-5β-cholan-24-oyl)-glycine	C26 H43 N O5			9.886	448.307	449.315	79.5		79.5				-0.81		Negative	3	12855		174630	10	Find by Molecular Feature											86.9
TRUE	57	3.d	DBSearch	N-(3α,12α-dihydroxy-5β-cholan-24-oyl)-glycine	C26 H43 N O5			9.875	448.308	449.315	95.03		95.03				-1.61		Negative	3	6758		93639	10	Find by Molecular Feature											87
TRUE	56	3.d	DBSearch	N-(3α,12α-dihydroxy-5β-cholan-24-oyl)-glycine	C26 H43 N O5			9.76	448.308	449.315	93.06		93.06				-2.85		Negative	3	7791		50362	10	Find by Molecular Feature											87
TRUE	14	4.d						1.473	452.921	453.929									Negative	3	9164		53761		Find by Molecular Feature											99.4
TRUE	20	2.d						1.464	452.922	453.929									Negative	3	11954		73164		Find by Molecular Feature											99.4
TRUE	16	5.d						1.466	452.922	453.929									Negative	3	10590		70497		Find by Molecular Feature											97.4
TRUE	26	1.d						1.47	452.923	453.93									Negative	3	17629		112921		Find by Molecular Feature											99.7
TRUE	15	3.d						1.458	452.923	453.93									Negative	3	8367		53596		Find by Molecular Feature											92.3
TRUE	50	5.d						2.542	459.111	460.119									Negative	3	22723		573000		Find by Molecular Feature											100
TRUE	54	4.d						2.557	459.112	460.119									Negative	4	32802		664059		Find by Molecular Feature											100
TRUE	66	1.d	DBSearch	Asperuloside	C18 H22 O11			2.549	459.112	414.114	88		88				5.27		Negative	3	23644		593103	1	Find by Molecular Feature											100
TRUE	45	3.d	DBSearch	Asperuloside	C18 H22 O11			2.552	459.112	414.114	88.71		88.71				5.18		Negative	3	24841		671588	1	Find by Molecular Feature											100
TRUE	58	2.d	DBSearch	Asperuloside	C18 H22 O11			2.534	459.113	414.114	91.03		91.03				4.6		Negative	3	19160		486979	1	Find by Molecular Feature											100
TRUE	39	CPM4u_PB.d	DBSearch	3α-hydroxy-5α-androstane-17-one 3-D-glucuronide	C25 H38 O8			9.442	465.251	466.258	91.47		91.47				-3.23		Negative	3	9247		103713	10	Find by Molecular Feature											97.6
TRUE	41	CPM0u_PB.d						9.439	465.252	466.259									Negative	3	14463		187447		Find by Molecular Feature											100
TRUE	39	1.d						1.482	468.897	469.904									Negative	3	7514		46948		Find by Molecular Feature											100
TRUE	66	5.d	DBSearch	LysoPE(0:0/18:2(9Z,12Z))	C23 H44 N O7 P			10.865	476.279	477.288	54.42		54.42				-4.77		Negative	4	8102		110183	3	Find by Molecular Feature											100
TRUE	77	2.d	DBSearch	LysoPE(0:0/18:2(9Z,12Z))	C23 H44 N O7 P			10.879	476.279	477.286	80.44		80.44				-1.26		Negative	3	10906		145852	3	Find by Molecular Feature											100
TRUE	83	1.d	DBSearch	LysoPE(0:0/18:2(9Z,12Z))	C23 H44 N O7 P			10.891	476.279	477.287	67.85		67.85				-3.51		Negative	3	11255		165422	3	Find by Molecular Feature											100
TRUE	64	3.d	DBSearch	LysoPE(0:0/18:2(9Z,12Z))	C23 H44 N O7 P			10.877	476.279	477.288	57.19		57.19				-4.77		Negative	3	8822		148864	3	Find by Molecular Feature											100
TRUE	70	4.d	DBSearch	LysoPE(0:0/18:2(9Z,12Z))	C23 H44 N O7 P			10.868	476.279	477.288	51.81		51.81				-5.51		Negative	4	7382		108873	3	Find by Molecular Feature											100
TRUE	84	4.d	DBSearch	LysoPE(0:0/18:0)	C23 H48 N O7 P			12.039	480.31	481.317	97.48		97.48				-1.35		Negative	3	5666		125315	3	Find by Molecular Feature											100
TRUE	96	1.d	DBSearch	LysoPE(0:0/18:0)	C23 H48 N O7 P			12.091	480.31	481.318	95.69		95.69				-2.17		Negative	3	8228		213721	3	Find by Molecular Feature											100
TRUE	74	5.d	DBSearch	LysoPE(0:0/18:0)	C23 H48 N O7 P			11.424	480.311	481.319	74.98		74.98				-5		Negative	3	6170		144351	3	Find by Molecular Feature											100
TRUE	88	2.d	DBSearch	LysoPE(0:0/18:0)	C23 H48 N O7 P			12.013	480.311	481.318	91.59		91.59				-3.02		Negative	3	8405		106562	3	Find by Molecular Feature											87
TRUE	90	2.d	DBSearch	LysoPE(0:0/18:0)	C23 H48 N O7 P			12.171	480.311	481.319	85.03		85.03				-4.08		Negative	3	7595		96021	3	Find by Molecular Feature											86.2
TRUE	80	4.d	DBSearch	LysoPE(0:0/18:0)	C23 H48 N O7 P			11.433	480.311	481.319	83.35		83.35				-4.3		Negative	3	6590		145540	3	Find by Molecular Feature											100
TRUE	73	3.d	DBSearch	PE(18:0/0:0)	C23 H48 N O7 P			12.006	480.312	481.319	89.08		89.08				-4.41		Negative	3	7799		90112	2	Find by Molecular Feature											86
TRUE	41	3.d	DBSearch	Lactose 6-phosphate	C12 H23 O14 P			2.461	481.095	422.081	75.32		75.32				2.92		Negative	3	5340		117766	5	Find by Molecular Feature											80
TRUE	65	3.d	DBSearch	LysoPE(0:0/20:4(8Z,11Z,14Z,17Z))	C25 H44 N O7 P			10.908	500.279	501.286	92.42		92.42				-1.34		Negative	3	8137		112588	7	Find by Molecular Feature											100
TRUE	78	2.d	DBSearch	LysoPE(0:0/20:4(8Z,11Z,14Z,17Z))	C25 H44 N O7 P			10.907	500.279	501.286	95.86		95.86				-2		Negative	3	11175		145527	7	Find by Molecular Feature											96.9
TRUE	67	5.d	DBSearch	LysoPE(0:0/20:4(8Z,11Z,14Z,17Z))	C25 H44 N O7 P			10.896	500.279	501.286	96.46		96.46				-1.48		Negative	4	7189		96836	7	Find by Molecular Feature											100
TRUE	71	4.d	DBSearch	LysoPE(0:0/20:4(8Z,11Z,14Z,17Z))	C25 H44 N O7 P			10.9	500.279	501.286	80.87		80.87				-1.64		Negative	3	5644		71818	7	Find by Molecular Feature											100
TRUE	84	1.d	DBSearch	LysoPE(0:0/20:4(8Z,11Z,14Z,17Z))	C25 H44 N O7 P			10.915	500.28	501.287	89.94		89.94				-3.14		Negative	3	9462		132062	7	Find by Molecular Feature											100
TRUE	88	1.d	DBSearch	LysoPE(0:0/20:2(11Z,14Z))	C25 H48 N O7 P			11.151	504.309	505.317	95.67		95.67				-0.02		Negative	3	5729		102254	3	Find by Molecular Feature											100
TRUE	75	4.d	DBSearch	LysoPE(0:0/20:2(11Z,14Z))	C25 H48 N O7 P			11.13	504.31	505.317	77.64		77.64				-1.1		Negative	2	5067		75826	3	Find by Molecular Feature											100
TRUE	79	1.d	DBSearch	PE(17:0/0:0)	C22 H46 N O7 P			10.551	512.3	467.301	98.59		98.59				-0.59		Negative	3	18748		261006	7	Find by Molecular Feature											100
TRUE	66	4.d	DBSearch	PE(17:0/0:0)	C22 H46 N O7 P			10.533	512.3	467.302	99.13		99.13				-1.08		Negative	4	14549		193228	7	Find by Molecular Feature											100
TRUE	62	5.d	DBSearch	PE(17:0/0:0)	C22 H46 N O7 P			10.525	512.3	467.302	97.51		97.51				-2.11		Negative	4	19680		250158	7	Find by Molecular Feature											100
TRUE	73	2.d	DBSearch	PE(17:0/0:0)	C22 H46 N O7 P			10.541	512.301	467.302	95.66		95.66				-2.67		Negative	3	20464		273789	7	Find by Molecular Feature											100
TRUE	60	3.d	DBSearch	PE(17:0/0:0)	C22 H46 N O7 P			10.538	512.301	467.303	95.37		95.37				-2.72		Negative	4	17795		260632	7	Find by Molecular Feature											100
TRUE	21	1.d						1.465	514.893	515.901									Negative	3	7461		56651		Find by Molecular Feature											100
TRUE	15	4.d						1.473	520.909	521.917									Negative	3	9782		52409		Find by Molecular Feature											100
TRUE	17	3.d						1.46	520.909	521.917									Negative	3	8404		50600		Find by Molecular Feature											94.3
TRUE	17	5.d						1.467	520.909	521.917									Negative	3	11577		69621		Find by Molecular Feature											100
TRUE	23	1.d						1.468	520.91	521.917									Negative	3	17880		106196		Find by Molecular Feature											100
TRUE	18	2.d						1.461	520.91	521.918									Negative	3	11240		68199		Find by Molecular Feature											98.8
TRUE	68	5.d	DBSearch	LysoPE(0:0/22:6(4Z,7Z,10Z,13Z,16Z,19Z))	C27 H44 N O7 P			10.908	524.279	525.286	78.5		78.5				-0.69		Negative	2	10756		124969	3	Find by Molecular Feature											99.5
TRUE	66	3.d	DBSearch	LysoPE(0:0/22:6(4Z,7Z,10Z,13Z,16Z,19Z))	C27 H44 N O7 P			10.918	524.279	525.286	76.29		76.29				-1.34		Negative	2	10388		128176	3	Find by Molecular Feature											100
TRUE	72	4.d	DBSearch	LysoPE(0:0/22:6(4Z,7Z,10Z,13Z,16Z,19Z))	C27 H44 N O7 P			10.918	524.279	525.287	75.66		75.66				-2.02		Negative	2	7617		95479	3	Find by Molecular Feature											100
TRUE	85	1.d	DBSearch	LysoPE(0:0/22:6(4Z,7Z,10Z,13Z,16Z,19Z))	C27 H44 N O7 P			10.93	524.28	525.287	75.95		75.95				-2.42		Negative	2	13073		165718	3	Find by Molecular Feature											100
TRUE	79	2.d	DBSearch	LysoPE(0:0/22:6(4Z,7Z,10Z,13Z,16Z,19Z))	C27 H44 N O7 P			10.919	524.28	525.287	75.17		75.17				-2.02		Negative	2	12313		143660	3	Find by Molecular Feature											100
TRUE	86	1.d	DBSearch	LysoPE(0:0/18:0)	C23 H48 N O7 P			10.961	526.313	481.315	73.56		73.56				3.36		Negative	2	9242		121982	3	Find by Molecular Feature											100
TRUE	73	4.d	DBSearch	LysoPE(0:0/18:0)	C23 H48 N O7 P			10.933	526.313	481.315	74.49		74.49				3.44		Negative	2	6457		68401	3	Find by Molecular Feature											100
TRUE	69	5.d	DBSearch	LysoPE(0:0/18:0)	C23 H48 N O7 P			10.934	526.314	481.315	76.03		76.03				2.98		Negative	2	8498		84228	3	Find by Molecular Feature											100
TRUE	67	3.d	DBSearch	LysoPE(0:0/18:0)	C23 H48 N O7 P			10.939	526.315	481.315	79.21		79.21				2.71		Negative	3	7745		84491	3	Find by Molecular Feature											100
TRUE	5	1.d						1.354	532.873	533.88									Negative	3	5036		37382		Find by Molecular Feature											83
TRUE	23	4.d						1.48	536.882	537.89									Negative	3	5205		27252		Find by Molecular Feature											98.6
TRUE	28	5.d						1.478	536.884	537.891									Negative	3	5281		29215		Find by Molecular Feature											97.1
TRUE	29	2.d						1.47	536.884	537.891									Negative	3	6913		43557		Find by Molecular Feature											100
TRUE	38	1.d						1.481	536.884	537.892									Negative	3	10642		65030		Find by Molecular Feature											100
TRUE	76	2.d	DBSearch	PS(19:0/0:0)	C25 H50 N O9 P			10.839	538.316	539.323	98.05		98.05				-1.09		Negative	4	20701		340205	8	Find by Molecular Feature											100
TRUE	69	4.d	DBSearch	PS(19:0/0:0)	C25 H50 N O9 P			10.832	538.316	539.323	94.29		94.29				-1.64		Negative	4	14723		263644	8	Find by Molecular Feature											100
TRUE	65	5.d	DBSearch	PS(19:0/0:0)	C25 H50 N O9 P			10.822	538.316	539.323	98.22		98.22				-1.61		Negative	4	18683		311897	8	Find by Molecular Feature											100
TRUE	63	3.d	DBSearch	PS(19:0/0:0)	C25 H50 N O9 P			10.84	538.316	539.323	97.37		97.37				-1.58		Negative	3	17407		284973	8	Find by Molecular Feature											100
TRUE	82	1.d	DBSearch	PS(19:0/0:0)	C25 H50 N O9 P			10.848	538.316	539.323	98.22		98.22				-1.62		Negative	4	21273		361588	8	Find by Molecular Feature											100
TRUE	75	5.d	DBSearch	PE(19:0/0:0)	C24 H50 N O7 P			11.427	540.332	495.333	97.83		97.83				-1.91		Negative	4	99223		2631303	3	Find by Molecular Feature											100
TRUE	79	4.d	DBSearch	PE(19:0/0:0)	C24 H50 N O7 P			11.428	540.332	495.334	96.88		96.88				-2.32		Negative	4	109176		2830858	3	Find by Molecular Feature											100
TRUE	84	2.d	DBSearch	PE(19:0/0:0)	C24 H50 N O7 P			11.443	540.332	495.334	95.99		95.99				-2.67		Negative	4	100344		2841560	3	Find by Molecular Feature											100
TRUE	92	1.d	DBSearch	PE(19:0/0:0)	C24 H50 N O7 P			11.453	540.332	495.334	95.26		95.26				-2.91		Negative	4	133902		3910618	3	Find by Molecular Feature											100
TRUE	71	3.d	DBSearch	PE(19:0/0:0)	C24 H50 N O7 P			11.439	540.332	495.334	95.26		95.26				-3.08		Negative	4	92017		2659624	3	Find by Molecular Feature											100
TRUE	83	4.d	DBSearch	LysoPE(20:0/0:0)	C25 H52 N O7 P			11.918	554.347	509.348	75.06		75.06				-0.21		Negative	2	5758		110849	4	Find by Molecular Feature											100
TRUE	95	1.d	DBSearch	LysoPE(20:0/0:0)	C25 H52 N O7 P			11.954	554.347	509.347	59.99		59.99				2.59		Negative	3	7759		182200	4	Find by Molecular Feature											100
TRUE	78	5.d	DBSearch	LysoPE(20:0/0:0)	C25 H52 N O7 P			11.919	554.347	509.349	75.77		75.77				-1.6		Negative	2	6959		117161	4	Find by Molecular Feature											95.8
TRUE	87	2.d	DBSearch	LysoPE(20:0/0:0)	C25 H52 N O7 P			11.93	554.348	509.348	79.39		79.39				0.8		Negative	4	7247		169623	4	Find by Molecular Feature											99.2
TRUE	67	4.d	DBSearch	LysoPE(0:0/20:3(8Z,11Z,14Z))	C25 H46 N O7 P			10.708	562.315	503.301	98.74		98.74				0.7		Negative	3	6027		104384	7	Find by Molecular Feature											100
TRUE	81	1.d	DBSearch	LysoPE(0:0/20:3(8Z,11Z,14Z))	C25 H46 N O7 P			10.756	562.315	503.301	77.97		77.97				-0.08		Negative	2	7402		85318	7	Find by Molecular Feature											87
TRUE	74	2.d	DBSearch	LysoPE(0:0/20:3(8Z,11Z,14Z))	C25 H46 N O7 P			10.713	562.315	503.301	97.37		97.37				-0.15		Negative	3	7410		130794	7	Find by Molecular Feature											100
TRUE	61	3.d	DBSearch	LysoPE(0:0/20:3(8Z,11Z,14Z))	C25 H46 N O7 P			10.715	562.315	503.301	96.57		96.57				-0.65		Negative	3	6236		115693	7	Find by Molecular Feature											100
TRUE	64	5.d	DBSearch	LysoPE(0:0/20:3(8Z,11Z,14Z))	C25 H46 N O7 P			10.741	562.315	503.302	76.45		76.45				-1.01		Negative	2	6230		79554	7	Find by Molecular Feature											80
TRUE	74	4.d	DBSearch	LysoPE(0:0/20:2(11Z,14Z))	C25 H48 N O7 P			11.127	564.331	505.317	99.24		99.24				-1.02		Negative	4	86414		1526342	3	Find by Molecular Feature											100
TRUE	87	1.d	DBSearch	LysoPE(0:0/20:2(11Z,14Z))	C25 H48 N O7 P			11.133	564.332	505.318	97.21		97.21				-2.19		Negative	4	105688		2074934	3	Find by Molecular Feature											100
TRUE	80	2.d	DBSearch	LysoPE(0:0/20:2(11Z,14Z))	C25 H48 N O7 P			11.135	564.332	505.318	97.11		97.11				-2.29		Negative	4	83742		1382494	3	Find by Molecular Feature											80
TRUE	70	5.d	DBSearch	LysoPE(0:0/20:2(11Z,14Z))	C25 H48 N O7 P			11.105	564.332	505.318	97.36		97.36				-2.19		Negative	4	77192		1589838	3	Find by Molecular Feature											100
TRUE	68	3.d	DBSearch	LysoPE(0:0/20:2(11Z,14Z))	C25 H48 N O7 P			11.12	564.332	505.318	97.01		97.01				-2.4		Negative	4	74609		1121922	3	Find by Molecular Feature											80
TRUE	94	1.d	DBSearch	PS(21:0/0:0)	C27 H54 N O9 P			11.77	566.347	567.354	98.65		98.65				-1.36		Negative	4	69117		1756598	5	Find by Molecular Feature											80
TRUE	72	3.d	DBSearch	PS(21:0/0:0)	C27 H54 N O9 P			11.755	566.348	567.355	96.39		96.39				-2.42		Negative	4	49298		1252564	5	Find by Molecular Feature											100
TRUE	82	4.d	DBSearch	PS(21:0/0:0)	C27 H54 N O9 P			11.741	566.348	567.355	96.03		96.03				-2.37		Negative	4	56532		1304666	5	Find by Molecular Feature											100
TRUE	77	5.d	DBSearch	PS(21:0/0:0)	C27 H54 N O9 P			11.738	566.348	567.355	96.7		96.7				-2.26		Negative	3	57086		1360605	5	Find by Molecular Feature											100
TRUE	86	2.d	DBSearch	PS(21:0/0:0)	C27 H54 N O9 P			11.762	566.348	567.355	96.38		96.38				-2.38		Negative	4	57292		1504996	5	Find by Molecular Feature											100
TRUE	79	5.d	DBSearch	PE(21:0/0:0)	C26 H54 N O7 P			12.471	568.363	523.365	98.75		98.75				-1.41		Negative	4	64353		1857945	5	Find by Molecular Feature											100
TRUE	97	1.d	DBSearch	PE(21:0/0:0)	C26 H54 N O7 P			12.516	568.363	523.365	98.35		98.35				-1.5		Negative	4	83982		2668812	5	Find by Molecular Feature											80
TRUE	85	4.d	DBSearch	PE(21:0/0:0)	C26 H54 N O7 P			12.465	568.363	523.365	98.23		98.23				-1.78		Negative	4	64489		1705863	5	Find by Molecular Feature											100
TRUE	74	3.d	DBSearch	PE(21:0/0:0)	C26 H54 N O7 P			12.49	568.363	523.365	97.32		97.32				-2.11		Negative	4	63438		1945582	5	Find by Molecular Feature											100
TRUE	91	2.d	DBSearch	PE(21:0/0:0)	C26 H54 N O7 P			12.501	568.364	523.365	95.9		95.9				-2.69		Negative	4	69386		2307928	5	Find by Molecular Feature											94.2
TRUE	14	2.d						1.453	582.88	583.887									Negative	3	5070		32991		Find by Molecular Feature											100
TRUE	20	1.d						1.463	582.881	583.888									Negative	3	7763		58418		Find by Molecular Feature											100
TRUE	68	4.d	DBSearch	LysoPE(0:0/22:5(7Z,10Z,13Z,16Z,19Z))	C27 H46 N O7 P			10.723	586.315	527.301	99.44		99.44				-0.12		Negative	4	30980		455628	4	Find by Molecular Feature											100
TRUE	63	5.d	DBSearch	LysoPE(0:0/22:5(7Z,10Z,13Z,16Z,19Z))	C27 H46 N O7 P			10.718	586.316	527.302	99.34		99.34				-0.89		Negative	4	37052		552511	4	Find by Molecular Feature											100
TRUE	80	1.d	DBSearch	LysoPE(0:0/22:5(7Z,10Z,13Z,16Z,19Z))	C27 H46 N O7 P			10.742	586.316	527.302	99.17		99.17				-0.52		Negative	4	38465		569478	4	Find by Molecular Feature											100
TRUE	75	2.d	DBSearch	LysoPE(0:0/22:5(7Z,10Z,13Z,16Z,19Z))	C27 H46 N O7 P			10.732	586.316	527.302	98.67		98.67				-1.07		Negative	4	38131		553300	4	Find by Molecular Feature											100
TRUE	62	3.d	DBSearch	LysoPE(0:0/22:5(7Z,10Z,13Z,16Z,19Z))	C27 H46 N O7 P			10.729	586.316	527.302	98.72		98.72				-1.38		Negative	4	31244		471528	4	Find by Molecular Feature											100
TRUE	76	4.d	DBSearch	LysoPE(0:0/22:4(7Z,10Z,13Z,16Z))	C27 H48 N O7 P			11.145	588.331	529.317	99.66		99.66				-0.12		Negative	4	21801		396144	3	Find by Molecular Feature											100
TRUE	89	1.d	DBSearch	LysoPE(0:0/22:4(7Z,10Z,13Z,16Z))	C27 H48 N O7 P			11.154	588.331	529.317	99.52		99.52				-0.72		Negative	4	23423		486717	3	Find by Molecular Feature											100
TRUE	71	5.d	DBSearch	LysoPE(0:0/22:4(7Z,10Z,13Z,16Z))	C27 H48 N O7 P			11.143	588.331	529.317	99.22		99.22				-1.12		Negative	4	19571		276718	3	Find by Molecular Feature											80
TRUE	81	2.d	DBSearch	LysoPE(0:0/22:4(7Z,10Z,13Z,16Z))	C27 H48 N O7 P			11.139	588.332	529.318	98.18		98.18				-1.59		Negative	4	20060		395653	3	Find by Molecular Feature											100
TRUE	16	4.d						1.474	588.895	589.903									Negative	2	8487		43264		Find by Molecular Feature											100
TRUE	15	5.d						1.463	588.896	589.903									Negative	3	9478		63301		Find by Molecular Feature											97.7
TRUE	17	2.d						1.46	588.896	589.903									Negative	3	10451		62503		Find by Molecular Feature											96.3
TRUE	13	3.d						1.454	588.897	589.904									Negative	3	8692		48419		Find by Molecular Feature											91.4
TRUE	22	1.d						1.466	588.898	589.905									Negative	3	15927		95447		Find by Molecular Feature											100
TRUE	81	4.d						11.578	590.347	591.354									Negative	3	6518		97940		Find by Molecular Feature											86.8
TRUE	93	1.d						11.566	590.347	591.355									Negative	3	6131		124257		Find by Molecular Feature											100
TRUE	76	5.d						11.493	590.347	591.355									Negative	3	6210		71245		Find by Molecular Feature											87
TRUE	85	2.d						11.563	590.348	591.355									Negative	3	5614		107710		Find by Molecular Feature											80
TRUE	26	2.d						1.47	604.87	605.878									Negative	3	7263		46881		Find by Molecular Feature											97.9
TRUE	21	4.d						1.478	604.871	605.878									Negative	3	5858		31966		Find by Molecular Feature											97.3
TRUE	21	5.d						1.473	604.871	605.878									Negative	3	5901		35544		Find by Molecular Feature											99.7
TRUE	32	1.d						1.476	604.871	605.879									Negative	3	10713		71760		Find by Molecular Feature											100
TRUE	61	1.d						2.264	605.156	606.163									Negative	2	21355		715291		Find by Molecular Feature											86.9
TRUE	48	4.d						2.246	605.156	606.163									Negative	2	30646		891430		Find by Molecular Feature											97.4
TRUE	48	5.d						2.205	605.156	606.163									Negative	2	34426		859006		Find by Molecular Feature											100
TRUE	53	2.d						2.192	605.157	606.164									Negative	3	31669		865075		Find by Molecular Feature											96.3
TRUE	39	2.d						1.729	605.157	606.164									Negative	2	5628		23315		Find by Molecular Feature											82
TRUE	77	4.d	DBSearch	LysoPE(0:0/24:6(6Z,9Z,12Z,15Z,18Z,21Z))	C29 H48 N O7 P			11.148	612.33	553.317	99.47		99.47				0.4		Negative	4	17908		318259	2	Find by Molecular Feature											100
TRUE	90	1.d	DBSearch	LysoPE(0:0/24:6(6Z,9Z,12Z,15Z,18Z,21Z))	C29 H48 N O7 P			11.185	612.331	553.317	74.64		74.64				-0.46		Negative	2	19447		314926	2	Find by Molecular Feature											100
TRUE	72	5.d	DBSearch	LysoPE(0:0/24:6(6Z,9Z,12Z,15Z,18Z,21Z))	C29 H48 N O7 P			11.155	612.331	553.317	99		99				-0.35		Negative	4	17789		296946	2	Find by Molecular Feature											80
TRUE	82	2.d	DBSearch	LysoPE(0:0/24:6(6Z,9Z,12Z,15Z,18Z,21Z))	C29 H48 N O7 P			11.176	612.332	553.318	74.8		74.8				-1.31		Negative	2	16662		242587	2	Find by Molecular Feature											100
TRUE	69	3.d	DBSearch	LysoPE(0:0/24:6(6Z,9Z,12Z,15Z,18Z,21Z))	C29 H48 N O7 P			11.168	612.332	553.318	97.12		97.12				-1.37		Negative	3	14483		218950	2	Find by Molecular Feature											100
TRUE	52	2.d						2.185	621.129	622.136									Negative	2	6233		141999		Find by Molecular Feature											95.3
TRUE	50	2.d	DBSearch	Fusaroskyrin	C32 H22 O12			2.108	643.109	598.11	65.75		65.75				2.63		Negative	4	5372		83801	1	Find by Molecular Feature											100
TRUE	44	4.d	DBSearch	Fusaroskyrin	C32 H22 O12			2.15	643.11	598.112	82.26		82.26				-1.16		Negative	3	5064		93099	1	Find by Molecular Feature											98
TRUE	42	4.d	DBSearch	UDP-4-amino-4,6-dideoxy-N-acetyl-beta-L-altrosamine	C17 H28 N4 O15 P2			2.101	649.118	590.104	80.9		80.9				-1.51		Negative	3	6229		93610	3	Find by Molecular Feature											100
TRUE	43	5.d	DBSearch	UDP-4-amino-4,6-dideoxy-N-acetyl-beta-L-altrosamine	C17 H28 N4 O15 P2			2.08	649.118	590.104	89.54		89.54				-1.5		Negative	4	8581		114957	3	Find by Molecular Feature											100
TRUE	45	2.d	DBSearch	UDP-4-amino-4,6-dideoxy-N-acetyl-beta-L-altrosamine	C17 H28 N4 O15 P2			2.07	649.119	590.104	80.65		80.65				-2.75		Negative	3	6733		81852	3	Find by Molecular Feature											100
TRUE	36	3.d	DBSearch	Manniflavanone	C30 H22 O13			2.125	649.12	590.105	75.31		75.31				2.08		Negative	3	6020		104394	1	Find by Molecular Feature											100
TRUE	17	1.d						1.462	650.867	651.874									Negative	3	6320		47673		Find by Molecular Feature											99.5
TRUE	60	1.d						2.231	656.068	657.076									Negative	3	10202		239146		Find by Molecular Feature											80.5
TRUE	12	4.d						1.469	656.881	657.889									Negative	3	5500		30017		Find by Molecular Feature											97.3
TRUE	14	5.d						1.463	656.881	657.889									Negative	2	6825		37374		Find by Molecular Feature											95.9
TRUE	14	3.d						1.456	656.882	657.889									Negative	2	5521		29698		Find by Molecular Feature											95.7
TRUE	18	1.d						1.462	656.884	657.891									Negative	3	10723		61440		Find by Molecular Feature											100
TRUE	16	2.d						1.456	656.885	657.892									Negative	3	7373		40009		Find by Molecular Feature											100
TRUE	30	1.d						1.474	672.858	673.865									Negative	3	9536		56947		Find by Molecular Feature											100
TRUE	24	2.d						1.469	672.859	673.866									Negative	3	5743		35272		Find by Molecular Feature											100
TRUE	25	5.d						1.476	672.859	673.866									Negative	3	5182		27564		Find by Molecular Feature											90.8
TRUE	15	1.d						1.459	718.853	719.861									Negative	3	5659		41696		Find by Molecular Feature											100
TRUE	13	5.d						1.459	724.866	725.873									Negative	3	5512		35542		Find by Molecular Feature											92.9
TRUE	15	2.d						1.454	724.87	725.877									Negative	3	5769		30230		Find by Molecular Feature											93.9
TRUE	16	1.d						1.459	724.872	725.879									Negative	3	8569		46255		Find by Molecular Feature											91.2
TRUE	19	2.d						1.463	740.843	741.85									Negative	3	5770		32901		Find by Molecular Feature											93.3
TRUE	24	1.d						1.469	740.846	741.853									Negative	5	7566		55628		Find by Molecular Feature											100
TRUE	80	5.d	DBSearch	PE-Cer(d16:1(4E)/21:0)	C39 H79 N2 O6 P			12.902	747.565	702.566	64.64		64.64				1.76		Negative	2	9565		396614	6	Find by Molecular Feature											86.6
TRUE	51	4.d						2.539	773.183	774.19									Negative	4	5424		124399		Find by Molecular Feature											100
TRUE	42	3.d						2.481	773.183	774.19									Negative	3	5290		142491		Find by Molecular Feature											80
TRUE	19	1.d						1.462	786.839	787.847									Negative	3	5270		37739		Find by Molecular Feature											100
TRUE	14	1.d						1.457	792.858	793.865									Negative	2	6439		30985		Find by Molecular Feature											90.4
TRUE	25	1.d						1.469	808.831	1619.68									Negative	5	6689		46988		Find by Molecular Feature											97
TRUE	75	3.d	DBSearch	PS(22:2(13Z,16Z)/17:1(9Z))	C45 H82 N O10 P			16.172	826.559	827.566	93.46		93.46				2.29		Negative	3	6132		360022	10	Find by Molecular Feature											87.4
TRUE	49	4.d						2.307	897.245	898.253									Negative	4	14568		347697		Find by Molecular Feature											100
TRUE	47	4.d						2.226	919.226	920.234									Negative	4	5773		147720		Find by Molecular Feature											100
TRUE	47	5.d						2.186	919.227	920.234									Negative	4	8921		195221		Find by Molecular Feature											100
TRUE	40	3.d						2.237	919.227	920.235									Negative	4	5679		167607		Find by Molecular Feature											100
TRUE	51	2.d						2.158	919.228	920.235									Negative	2	8296		136356		Find by Molecular Feature											99.4
TRUE	51	1.d						2.022	957.97	958.977									Negative	2	11723		400312		Find by Molecular Feature											90.4
TRUE	91	1.d	DBSearch	NeuAcalpha2-3Galbeta-Cer(d18:1/16:0)	C51 H94 N2 O16			11.446	1035.66	990.663	93.54		93.54				-2.76		Negative	5	26531		681537	1	Find by Molecular Feature											100
TRUE	83	2.d	DBSearch	NeuAcalpha2-3Galbeta-Cer(d18:1/16:0)	C51 H94 N2 O16			11.435	1035.66	990.663	93.7		93.7				-2.5		Negative	5	20973		555015	1	Find by Molecular Feature											100
TRUE	73	5.d	DBSearch	NeuAcalpha2-3Galbeta-Cer(d18:1/16:0)	C51 H94 N2 O16			11.417	1035.66	990.663	92.82		92.82				-2.7		Negative	4	20098		457473	1	Find by Molecular Feature											100
TRUE	70	3.d	DBSearch	NeuAcalpha2-3Galbeta-Cer(d18:1/16:0)	C51 H94 N2 O16			11.432	1035.66	990.664	91.62		91.62				-3.25		Negative	4	18473		475433	1	Find by Molecular Feature											100
TRUE	78	4.d	DBSearch	NeuAcalpha2-3Galbeta-Cer(d18:1/16:0)	C51 H94 N2 O16			11.419	1035.66	990.664	90.48		90.48				-3.4		Negative	4	19645		435816	1	Find by Molecular Feature											100

## Sheet: TDaM
Show/Hide	Cpd	File	ID Source	Name	Formula	Flags (Tgt)	Saturated	RT	m/z	Mass	Score	Score (Lib)	Score (DB)	Score (MFG)	RT Diff (Tgt)	Diff (Tgt, ppm)	Diff (DB, ppm)	Diff (MFG, ppm)	Polarity	Ions	Height	Area	Vol	Hits (DB)	Algorithm	Library	AGILENTID	MPPID	NCBI ID	Formula (DB)	Formula (MFG)	Modified	Primary Base	Primary Note	Formula (Tgt)	Score (MFE)
TRUE	1	BW Tdas 240.d	DBSearch	(S)-3-Hydroxybutyric acid	C4 H8 O3			3.396	103.04	104.047	87.23		87.23				2.62		Negative	2	7082		147975	10	Find by Molecular Feature											80
TRUE	1	SW Tdas 120.d						6.25	117.054	118.062									Negative	2	6664		75423		Find by Molecular Feature											100
TRUE	1	PB Tdas 120.d						6.205	117.054	118.062									Negative	2	7641		93063		Find by Molecular Feature											100
TRUE	1	PB Tdas 240.d						6.223	117.054	118.062									Negative	2	7221		83181		Find by Molecular Feature											100
TRUE	1	PB Tdas 30.d						6.205	117.054	118.062									Negative	2	6006		71914		Find by Molecular Feature											100
TRUE	1	PW Tdas 120.d						6.222	117.054	118.062									Negative	2	5046		57541		Find by Molecular Feature											100
TRUE	1	PB Tdas 0.d						6.211	117.055	118.062									Negative	2	8410		112914		Find by Molecular Feature											100
TRUE	1	PW Tdas 60.d						6.215	117.055	118.062									Negative	2	5488		63410		Find by Molecular Feature											100
TRUE	1	PB Tdas 60.d						6.204	117.055	118.062									Negative	2	7181		87144		Find by Molecular Feature											100
TRUE	1	BW Tdas 120.d						6.195	117.055	118.062									Negative	2	7404		90933		Find by Molecular Feature											100
TRUE	3	BW Tdas 240.d						6.259	117.055	118.062									Negative	2	21787		242669		Find by Molecular Feature											100
TRUE	1	BW Tdas 30.d						6.207	117.055	118.062									Negative	2	6837		67911		Find by Molecular Feature											94.9
TRUE	1	BW Tdas 60.d						6.21	117.055	118.062									Negative	2	6142		71718		Find by Molecular Feature											100
TRUE	1	PW Tdas 30.d						6.214	117.055	118.062									Negative	2	5072		57437		Find by Molecular Feature											97.4
TRUE	1	SW Tdas 0.d						6.259	117.055	118.062									Negative	2	5255		56913		Find by Molecular Feature											100
TRUE	1	PW Tdas 0.d						6.218	117.055	118.062									Negative	2	5389		64885		Find by Molecular Feature											100
TRUE	1	SW Tdas 240.d						6.258	117.055	118.062									Negative	2	5039		55566		Find by Molecular Feature											100
TRUE	1	SW Tdas 60.d						6.248	117.055	118.062									Negative	2	6299		65661		Find by Molecular Feature											100
TRUE	3	BW Tdas 30.d						7.754	129.054	130.061									Negative	2	8270		190857		Find by Molecular Feature											100
TRUE	2	PW Tdas 240.d						7.749	129.054	130.062									Negative	2	5442		124012		Find by Molecular Feature											80.7
TRUE	2	BW Tdas 240.d						5.823	164.07	165.077									Negative	2	7515		114388		Find by Molecular Feature											100
TRUE	3	PB Tdas 0.d						7.676	178.048	179.055									Negative	2	6314		53482		Find by Molecular Feature											100
TRUE	6	BW Tdas 30.d						9.717	187.006	188.013									Negative	3	7098		217269		Find by Molecular Feature											80
TRUE	4	PW Tdas 60.d						9.46	195.101	196.108									Negative	2	6127		51014		Find by Molecular Feature											100
TRUE	6	BW Tdas 240.d						9.455	195.101	196.108									Negative	2	9901		94322		Find by Molecular Feature											100
TRUE	4	BW Tdas 120.d						9.46	195.101	196.108									Negative	2	6225		46097		Find by Molecular Feature											84.3
TRUE	4	PW Tdas 30.d						9.467	195.101	196.108									Negative	2	5724		50672		Find by Molecular Feature											100
TRUE	4	PW Tdas 120.d						9.461	195.101	196.109									Negative	2	5542		49524		Find by Molecular Feature											100
TRUE	5	PW Tdas 240.d	DBSearch	Isobutyl 2-furanpropionate	C11 H16 O3			9.464	195.102	196.109	82.2		82.2				4.6		Negative	2	5883		50895	3	Find by Molecular Feature											100
TRUE	2	SW Tdas 120.d						7.107	203.079	204.087									Negative	5	25572		212204		Find by Molecular Feature											100
TRUE	2	PB Tdas 0.d						7.11	203.08	204.087									Negative	5	26209		216411		Find by Molecular Feature											100
TRUE	2	PB Tdas 120.d						7.104	203.08	204.087									Negative	5	28471		243195		Find by Molecular Feature											100
TRUE	2	SW Tdas 60.d						7.108	203.08	204.087									Negative	5	23857		202368		Find by Molecular Feature											100
TRUE	2	PB Tdas 30.d						7.105	203.08	204.087									Negative	5	24453		189972		Find by Molecular Feature											100
TRUE	2	PB Tdas 60.d						7.104	203.08	204.088									Negative	5	28104		227992		Find by Molecular Feature											100
TRUE	2	BW Tdas 30.d						7.102	203.08	204.088									Negative	5	28140		218329		Find by Molecular Feature											100
TRUE	1	BW Tdas 0.d						7.106	203.08	204.088									Negative	4	16562		124303		Find by Molecular Feature											100
TRUE	2	BW Tdas 120.d						7.099	203.08	204.088									Negative	5	31931		278583		Find by Molecular Feature											100
TRUE	2	PW Tdas 120.d						7.105	203.08	204.088									Negative	5	22600		184629		Find by Molecular Feature											100
TRUE	2	PB Tdas 240.d						7.105	203.08	204.088									Negative	5	23923		204571		Find by Molecular Feature											100
TRUE	2	SW Tdas 240.d						7.109	203.08	204.088									Negative	5	20356		154237		Find by Molecular Feature											100
TRUE	2	SW Tdas 0.d						7.109	203.081	204.088									Negative	5	18564		143145		Find by Molecular Feature											100
TRUE	4	BW Tdas 240.d						7.127	203.081	204.088									Negative	6	65489		527609		Find by Molecular Feature											100
TRUE	2	BW Tdas 60.d						7.105	203.081	204.088									Negative	5	28516		234933		Find by Molecular Feature											100
TRUE	1	PW Tdas 240.d						7.103	203.081	204.088									Negative	5	20332		153654		Find by Molecular Feature											100
TRUE	2	PW Tdas 30.d						7.106	203.081	204.088									Negative	5	25462		195660		Find by Molecular Feature											100
TRUE	2	PW Tdas 60.d						7.106	203.081	204.088									Negative	5	25102		202253		Find by Molecular Feature											100
TRUE	2	PW Tdas 0.d						7.105	203.081	204.088									Negative	5	23221		169947		Find by Molecular Feature											100
TRUE	1	SW Tdas 30.d						7.106	203.081	204.088									Negative	5	20404		170253		Find by Molecular Feature											100
TRUE	3	SW Tdas 30.d						10.295	207.137	208.144									Negative	2	5048		67774		Find by Molecular Feature											99.6
TRUE	13	BW Tdas 240.d						10.311	207.137	208.144									Negative	2	7453		106879		Find by Molecular Feature											100
TRUE	4	SW Tdas 120.d						9.451	239.089	240.096									Negative	3	14736		138981		Find by Molecular Feature											100
TRUE	4	SW Tdas 0.d						9.451	239.089	240.097									Negative	3	10046		102981		Find by Molecular Feature											100
TRUE	4	SW Tdas 240.d						9.448	239.089	240.097									Negative	3	12972		110474		Find by Molecular Feature											100
TRUE	4	SW Tdas 60.d						9.45	239.09	240.097									Negative	3	12786		123640		Find by Molecular Feature											100
TRUE	4	PB Tdas 60.d						9.469	239.09	240.097									Negative	2	9135		82033		Find by Molecular Feature											100
TRUE	5	BW Tdas 30.d						9.462	239.09	240.097									Negative	3	12280		119760		Find by Molecular Feature											100
TRUE	2	SW Tdas 30.d						9.447	239.09	240.097									Negative	2	11742		101183		Find by Molecular Feature											97.2
TRUE	5	BW Tdas 120.d						9.46	239.09	240.097									Negative	3	15578		154640		Find by Molecular Feature											100
TRUE	5	PW Tdas 30.d						9.468	239.09	240.097									Negative	3	16543		165019		Find by Molecular Feature											100
TRUE	5	PB Tdas 0.d						9.466	239.09	240.098									Negative	2	9111		88883		Find by Molecular Feature											100
TRUE	2	BW Tdas 0.d						9.457	239.09	240.098									Negative	3	10436		93441		Find by Molecular Feature											100
TRUE	4	PB Tdas 120.d						9.469	239.09	240.098									Negative	3	8990		86916		Find by Molecular Feature											100
TRUE	7	BW Tdas 240.d						9.456	239.09	240.098									Negative	3	38634		390199		Find by Molecular Feature											100
TRUE	4	PW Tdas 0.d						9.468	239.09	240.098									Negative	3	17174		169110		Find by Molecular Feature											100
TRUE	5	PW Tdas 120.d						9.466	239.09	240.098									Negative	3	16088		159022		Find by Molecular Feature											100
TRUE	4	PB Tdas 240.d						9.465	239.091	240.098									Negative	2	8897		79941		Find by Molecular Feature											100
TRUE	4	BW Tdas 60.d						9.463	239.091	240.098									Negative	3	13096		122599		Find by Molecular Feature											100
TRUE	4	PW Tdas 240.d						9.464	239.091	240.098									Negative	3	17182		170219		Find by Molecular Feature											100
TRUE	5	PW Tdas 60.d						9.461	239.091	240.098									Negative	3	19221		177771		Find by Molecular Feature											100
TRUE	4	PB Tdas 30.d	DBSearch	Isopropyl 3-(3,4-dihydroxyphenyl)-2-hydroxypropanoate	C12 H16 O5			9.475	239.091	240.099	80.91		80.91				4.77		Negative	2	7268		73294	3	Find by Molecular Feature											100
TRUE	3	SW Tdas 0.d						9.146	242.173	243.181									Negative	2	6566		59134		Find by Molecular Feature											100
TRUE	4	BW Tdas 30.d						8.125	255.083	256.09									Negative	2	6817		50624		Find by Molecular Feature											99.5
TRUE	3	PW Tdas 30.d						8.129	255.083	256.091									Negative	2	6391		46714		Find by Molecular Feature											100
TRUE	3	PB Tdas 240.d						8.127	255.084	256.091									Negative	2	6857		53160		Find by Molecular Feature											100
TRUE	3	PW Tdas 240.d						8.124	255.084	256.091									Negative	2	6946		49997		Find by Molecular Feature											97.4
TRUE	3	SW Tdas 120.d						8.126	255.084	256.091									Negative	2	6818		55800		Find by Molecular Feature											100
TRUE	3	SW Tdas 240.d						8.123	255.084	256.091									Negative	2	6930		48027		Find by Molecular Feature											100
TRUE	4	PB Tdas 0.d						8.131	255.084	256.091									Negative	3	8931		57067		Find by Molecular Feature											94.5
TRUE	3	SW Tdas 60.d						8.119	255.084	256.091									Negative	2	5974		46584		Find by Molecular Feature											100
TRUE	3	PB Tdas 120.d						8.135	255.084	256.091									Negative	3	7131		61492		Find by Molecular Feature											100
TRUE	3	PW Tdas 120.d						8.128	255.084	256.091									Negative	3	5633		43793		Find by Molecular Feature											100
FALSE	3	PB Tdas 30.d						8.129	255.084	256.091									Negative	3	6086		45382		Find by Molecular Feature											100
TRUE	3	PW Tdas 60.d						8.127	255.084	256.091									Negative	3	6986		52847		Find by Molecular Feature											100
TRUE	3	BW Tdas 60.d						8.13	255.084	256.091									Negative	3	6641		52134		Find by Molecular Feature											97
TRUE	3	BW Tdas 120.d						8.126	255.084	256.092									Negative	3	8669		67792		Find by Molecular Feature											96.6
TRUE	3	PB Tdas 60.d						8.131	255.085	256.092									Negative	2	7015		52393		Find by Molecular Feature											99.7
TRUE	5	BW Tdas 240.d						8.129	255.085	256.092									Negative	3	19863		159358		Find by Molecular Feature											100
TRUE	3	PW Tdas 0.d						8.129	255.085	256.092									Negative	2	6604		50432		Find by Molecular Feature											100
TRUE	5	SW Tdas 120.d						10.211	267.12	268.127									Negative	2	6227		65129		Find by Molecular Feature											100
TRUE	5	SW Tdas 60.d						10.21	267.12	268.127									Negative	2	5688		56981		Find by Molecular Feature											100
TRUE	5	SW Tdas 240.d						10.21	267.12	268.128									Negative	3	5268		56192		Find by Molecular Feature											100
TRUE	6	PB Tdas 60.d						10.235	267.121	268.128									Negative	3	5331		54259		Find by Molecular Feature											94
TRUE	11	BW Tdas 240.d						10.216	267.121	268.129									Negative	3	15300		174878		Find by Molecular Feature											100
TRUE	5	PB Tdas 120.d						10.235	267.122	268.129									Negative	3	5839		59733		Find by Molecular Feature											100
TRUE	6	PW Tdas 60.d						10.229	267.122	268.129									Negative	3	5702		60553		Find by Molecular Feature											100
TRUE	6	BW Tdas 120.d						10.226	267.122	268.129									Negative	2	6511		66985		Find by Molecular Feature											100
TRUE	5	PW Tdas 0.d						10.24	267.122	268.129									Negative	3	5484		57664		Find by Molecular Feature											95.2
TRUE	5	BW Tdas 60.d						10.231	267.122	268.129									Negative	3	5112		52262		Find by Molecular Feature											100
TRUE	6	PW Tdas 30.d						10.232	267.122	268.129									Negative	3	5722		56748		Find by Molecular Feature											100
TRUE	6	PW Tdas 120.d						10.233	267.122	268.129									Negative	3	5401		53941		Find by Molecular Feature											100
TRUE	6	PW Tdas 240.d						10.225	267.122	268.13									Negative	3	5536		63756		Find by Molecular Feature											100
TRUE	7	PB Tdas 0.d						10.235	267.122	268.13									Negative	3	7333		75052		Find by Molecular Feature											98.9
TRUE	10	BW Tdas 240.d						10.141	293.173	294.18									Negative	2	5231		52876		Find by Molecular Feature											91.8
TRUE	12	BW Tdas 240.d	DBSearch	Celiprolol	C20 H33 N3 O4			10.278	378.239	379.246	79.07		79.07				2.76		Negative	2	7146		102586	1	Find by Molecular Feature											100
TRUE	8	BW Tdas 240.d	DBSearch	3alpha,7beta,12alpha-Trihydroxy-5alpha-cholan-24-oic Acid	C24 H40 O5			9.614	407.279	408.286	85.74		85.74				4.74		Negative	4	6854		68071	10	Find by Molecular Feature											100
TRUE	15	BW Tdas 240.d						10.475	437.288	438.296									Negative	3	7660		122948		Find by Molecular Feature											97
TRUE	7	BW Tdas 30.d						9.794	448.304	449.312									Negative	3	5924		114522		Find by Molecular Feature											100
TRUE	3	BW Tdas 0.d	DBSearch	Deoxycholic acid glycine conjugate	C26 H43 N O5			9.793	448.305	449.312	89.08		89.08				4.75		Negative	4	8252		174729	6	Find by Molecular Feature											100
TRUE	5	PB Tdas 60.d	DBSearch	Deoxycholic acid glycine conjugate	C26 H43 N O5			9.777	448.305	449.312	87.32		87.32				4.69		Negative	3	7106		117454	6	Find by Molecular Feature											100
TRUE	5	PB Tdas 30.d	DBSearch	Deoxycholic acid glycine conjugate	C26 H43 N O5			9.783	448.305	449.313	93.36		93.36				3.46		Negative	3	9812		171484	6	Find by Molecular Feature											100
TRUE	6	PB Tdas 0.d	DBSearch	Deoxycholic acid glycine conjugate	C26 H43 N O5			9.775	448.306	449.313	95.69		95.69				2.62		Negative	4	11867		203811	6	Find by Molecular Feature											100
TRUE	9	BW Tdas 240.d						9.618	453.283	454.29									Negative	3	6096		67615		Find by Molecular Feature											100
TRUE	6	SW Tdas 60.d						10.482	512.298	513.305									Negative	3	6701		88557		Find by Molecular Feature											100
TRUE	4	SW Tdas 30.d	DBSearch	LysoPE(0:0/16:0)	C21 H44 N O7 P			10.478	512.298	453.284	91.95		91.95				3.54		Negative	3	6396		73728	1	Find by Molecular Feature											100
TRUE	14	BW Tdas 240.d	DBSearch	LysoPE(0:0/16:0)	C21 H44 N O7 P			10.473	512.298	453.284	87.98		87.98				3.9		Negative	3	15659		218496	1	Find by Molecular Feature											100
TRUE	6	SW Tdas 240.d	DBSearch	LysoPE(0:0/16:0)	C21 H44 N O7 P			10.479	512.298	453.284	91.8		91.8				3.25		Negative	3	6253		69777	1	Find by Molecular Feature											100
TRUE	7	PW Tdas 30.d	DBSearch	LysoPE(0:0/16:0)	C21 H44 N O7 P			10.511	512.298	453.285	93.36		93.36				2.09		Negative	3	5534		69151	1	Find by Molecular Feature											100
TRUE	5	PB Tdas 240.d	DBSearch	LysoPE(0:0/16:0)	C21 H44 N O7 P			10.509	512.299	453.285	96.63		96.63				1.44		Negative	3	7173		95564	1	Find by Molecular Feature											100
TRUE	7	BW Tdas 120.d	DBSearch	LysoPE(0:0/16:0)	C21 H44 N O7 P			10.499	512.299	453.285	96.01		96.01				1.54		Negative	3	5346		65097	1	Find by Molecular Feature											100
TRUE	6	SW Tdas 120.d	DBSearch	LysoPE(0:0/16:0)	C21 H44 N O7 P			10.481	512.299	453.285	98.54		98.54				0.94		Negative	3	7978		107337	1	Find by Molecular Feature											100
TRUE	6	PB Tdas 120.d	DBSearch	LysoPE(0:0/16:0)	C21 H44 N O7 P			10.519	512.299	453.285	99.04		99.04				0.41		Negative	3	8194		116354	1	Find by Molecular Feature											100
TRUE	5	SW Tdas 0.d	DBSearch	LysoPE(0:0/16:0)	C21 H44 N O7 P			10.483	512.299	453.285	97.03		97.03				0.31		Negative	3	6102		88676	1	Find by Molecular Feature											100
TRUE	6	PB Tdas 30.d	DBSearch	LysoPE(0:0/16:0)	C21 H44 N O7 P			10.523	512.299	453.285	89.42		89.42				1.56		Negative	4	7997		100284	1	Find by Molecular Feature											100
TRUE	7	PB Tdas 60.d	DBSearch	LysoPE(0:0/16:0)	C21 H44 N O7 P			10.518	512.299	453.285	96.09		96.09				0.9		Negative	3	7754		114549	1	Find by Molecular Feature											100
TRUE	8	PB Tdas 0.d	DBSearch	LysoPE(0:0/16:0)	C21 H44 N O7 P			10.521	512.299	453.285	92.27		92.27				1		Negative	3	10998		162817	1	Find by Molecular Feature											100
TRUE	7	PW Tdas 240.d	DBSearch	LysoPE(0:0/16:0)	C21 H44 N O7 P			10.5	512.3	453.285	93.47		93.47				0.57		Negative	3	5685		78306	3	Find by Molecular Feature											100
TRUE	7	PW Tdas 60.d	DBSearch	LysoPE(0:0/16:0)	C21 H44 N O7 P			10.507	512.3	453.286	97.03		97.03				-0.02		Negative	3	5722		68916	3	Find by Molecular Feature											100
TRUE	6	PW Tdas 0.d	DBSearch	LysoPE(0:0/16:0)	C21 H44 N O7 P			10.514	512.3	453.286	87.54		87.54				-0.17		Negative	3	5024		65041	3	Find by Molecular Feature											100
TRUE	7	SW Tdas 120.d	DBSearch	LysoPE(20:3(11Z,14Z,17Z)/0:0)	C25 H46 N O7 P			10.651	562.313	503.3	93.04		93.04				2.87		Negative	3	6380		107347	6	Find by Molecular Feature											100
TRUE	7	SW Tdas 240.d	DBSearch	LysoPE(20:3(11Z,14Z,17Z)/0:0)	C25 H46 N O7 P			10.654	562.314	503.3	94.75		94.75				2.73		Negative	3	6317		102916	6	Find by Molecular Feature											100
TRUE	8	BW Tdas 120.d	DBSearch	LysoPE(20:3(11Z,14Z,17Z)/0:0)	C25 H46 N O7 P			10.671	562.314	503.3	97.3		97.3				1.72		Negative	3	6887		113747	6	Find by Molecular Feature											100
TRUE	7	SW Tdas 60.d						10.654	562.314	563.322									Negative	3	6361		106088		Find by Molecular Feature											100
TRUE	16	BW Tdas 240.d	DBSearch	LysoPE(20:3(11Z,14Z,17Z)/0:0)	C25 H46 N O7 P			10.647	562.315	503.301	95.98		95.98				1.08		Negative	4	14888		268707	6	Find by Molecular Feature											100
TRUE	7	PB Tdas 120.d	DBSearch	LysoPE(20:3(11Z,14Z,17Z)/0:0)	C25 H46 N O7 P			10.687	562.315	503.301	97.4		97.4				-0.4		Negative	3	6327		106822	6	Find by Molecular Feature											100
TRUE	8	BW Tdas 30.d	DBSearch	LysoPE(20:3(11Z,14Z,17Z)/0:0)	C25 H46 N O7 P			10.669	562.316	503.302	92.53		92.53				-0.97		Negative	3	5075		79724	6	Find by Molecular Feature											100
TRUE	8	SW Tdas 120.d	DBSearch	LysoPE(22:5(4Z,7Z,10Z,13Z,16Z)/0:0)	C27 H46 N O7 P			10.668	586.314	527.3	95.7		95.7				2.31		Negative	3	12197		163442	4	Find by Molecular Feature											100
TRUE	8	SW Tdas 240.d	DBSearch	LysoPE(22:5(4Z,7Z,10Z,13Z,16Z)/0:0)	C27 H46 N O7 P			10.668	586.314	527.301	97.16		97.16				1.07		Negative	3	12189		163836	4	Find by Molecular Feature											99.3
TRUE	8	SW Tdas 60.d						10.671	586.314	587.321									Negative	3	11319		162423		Find by Molecular Feature											100
TRUE	9	BW Tdas 120.d	DBSearch	LysoPE(22:5(4Z,7Z,10Z,13Z,16Z)/0:0)	C27 H46 N O7 P			10.691	586.315	527.301	99.74		99.74				0.09		Negative	4	16165		235762	4	Find by Molecular Feature											100

## Sheet: CMF
Show/Hide	Cpd	File	ID Source	Name	Formula	Flags (Tgt)	Saturated	RT	m/z	Mass	Score	Score (Lib)	Score (DB)	Score (MFG)	RT Diff (Tgt)	Diff (Tgt, ppm)	Diff (DB, ppm)	Diff (MFG, ppm)	Polarity	Ions	Height	Area	Vol	Hits (DB)	Algorithm	Library	AGILENTID	MPPID	NCBI ID	Formula (DB)	Formula (MFG)	Modified	Primary Base	Primary Note	Formula (Tgt)	Score (MFE)
TRUE	2	PW0.d	DBSearch	5-hydroxy valeric acid	C5 H10 O3			6.346	117.056	118.063	87.05		87.05				0.59		Negative	2	21423		262101	10	Find by Molecular Feature											100
TRUE	1	PW0.d	DBSearch	Methyl N-methylanthranilate	C9 H11 N O2			5.851	164.072	165.079	97.06		97.06				-2.18		Negative	3	21149		310887	10	Find by Molecular Feature											97.1
TRUE	7	PW0.d	DBSearch	Methyl n-formylanthranilate	C9 H9 N O3			7.77	178.052	179.059	96.32		96.32				-4.03		Negative	3	17707		173824	10	Find by Molecular Feature											100
TRUE	3	PW0.d	DBSearch	cis-3-(3-Carboxyethenyl)-3,5-cyclohexadiene-1,2-diol	C9 H10 O4			7.125	181.051	182.059	94.92		94.92				-3.5		Negative	3	6543		75095	10	Find by Molecular Feature											100
TRUE	1	BW2.d	DBSearch	3-Hydroxymethylantipyrine	C11 H12 N2 O2			7.215	203.082	204.09	86.77		86.77				0.55		Negative	3	10271		99712	10	Find by Molecular Feature											100
TRUE	1	SW2.d	DBSearch	3-Hydroxymethylantipyrine	C11 H12 N2 O2			7.201	203.082	204.09	87.15		87.15				0.68		Negative	4	12975		128146	10	Find by Molecular Feature											100
TRUE	1	SW1.d	DBSearch	3-Hydroxymethylantipyrine	C11 H12 N2 O2			7.203	203.083	204.09	83.02		83.02				0.7		Negative	3	8619		80328	10	Find by Molecular Feature											100
TRUE	1	SW30.d	DBSearch	3-Hydroxymethylantipyrine	C11 H12 N2 O2			7.209	203.083	204.09	84.94		84.94				-0.33		Negative	3	9925		98470	10	Find by Molecular Feature											100
TRUE	1	PW2.d	DBSearch	3-Hydroxymethylantipyrine	C11 H12 N2 O2			7.193	203.083	204.09	87.13		87.13				-0.45		Negative	4	12596		126812	10	Find by Molecular Feature											100
TRUE	1	PB30.d	DBSearch	3-Hydroxymethylantipyrine	C11 H12 N2 O2			7.214	203.083	204.09	87.15		87.15				-0.96		Negative	4	13829		131145	10	Find by Molecular Feature											100
TRUE	1	BW30.d	DBSearch	3-Hydroxymethylantipyrine	C11 H12 N2 O2			7.21	203.083	204.09	86.7		86.7				-0.93		Negative	3	11367		108038	10	Find by Molecular Feature											94.5
TRUE	1	BW1.d	DBSearch	3-Hydroxymethylantipyrine	C11 H12 N2 O2			7.208	203.083	204.09	86.87		86.87				-1.15		Negative	2	10233		93641	10	Find by Molecular Feature											100
TRUE	1	BW0.d	DBSearch	3-Hydroxymethylantipyrine	C11 H12 N2 O2			7.21	203.083	204.09	96.74		96.74				-0.74		Negative	5	10618		98966	10	Find by Molecular Feature											95.8
TRUE	1	PW4.d	DBSearch	3-Hydroxymethylantipyrine	C11 H12 N2 O2			7.201	203.083	204.09	86.33		86.33				-1.89		Negative	3	8556		87959	10	Find by Molecular Feature											100
TRUE	5	PW0.d	DBSearch	D-Tryptophan	C11 H12 N2 O2			7.2	203.083	204.09	98.3		98.3				-2.91		Negative	7	101535		1155252	8	Find by Molecular Feature											100
TRUE	1	SW4.d	DBSearch	3-Hydroxymethylantipyrine	C11 H12 N2 O2			7.196	203.083	204.09	83.55		83.55				-2.73		Negative	2	9921		81665	10	Find by Molecular Feature											100
TRUE	1	PW1.d	DBSearch	3-Hydroxymethylantipyrine	C11 H12 N2 O2			7.205	203.083	204.09	80.9		80.9				-2.63		Negative	2	10590		92479	10	Find by Molecular Feature											96.8
TRUE	1	PB1.d						7.211	203.084	204.091									Negative	2	11114		88980		Find by Molecular Feature											87.2
TRUE	1	PW30.d						7.21	203.084	204.091									Negative	2	8150		74808		Find by Molecular Feature											100
TRUE	1	PB0.d						7.221	203.084	204.091									Negative	3	10990		94466		Find by Molecular Feature											86
TRUE	1	PB2.d						7.208	203.084	204.091									Negative	4	9040		90915		Find by Molecular Feature											95.1
TRUE	1	PB4.d						7.204	203.084	204.091									Negative	3	10152		93537		Find by Molecular Feature											95.6
TRUE	6	PW0.d	DBSearch	Alpha-N-Phenylacetyl-L-glutamine	C13 H16 N2 O4			7.731	263.104	264.111	98.72		98.72				-1.76		Negative	3	27477		267904	10	Find by Molecular Feature											96.6
TRUE	11	PW0.d	DBSearch	Ripazepam	C15 H16 N4 O			10.299	267.125	268.132	83.41		83.41				1.41		Negative	2	6344		54794	10	Find by Molecular Feature											81.3
TRUE	10	PW0.d	DBSearch	Embelin	C17 H26 O4			10.229	293.176	294.184	97.46		97.46				-1.89		Negative	3	6388		72702	10	Find by Molecular Feature											83
TRUE	4	PW0.d	DBSearch	8-Acetoxy-4'-methoxypinoresinol	C23 H26 O8			7.198	429.154	430.161	95.58		95.58				3.1		Negative	3	12496		118979	10	Find by Molecular Feature											100
TRUE	9	PW0.d	DBSearch	Deoxycholic acid glycine conjugate	C26 H43 N O5			9.822	448.307	449.314	99.31		99.31				-0.66		Negative	5	21403		300233	6	Find by Molecular Feature											84.2
TRUE	8	PW0.d	DBSearch	Glycocholic acid	C26 H43 N O6			9.204	464.301	465.308	98.01		98.01				1.36		Negative	4	21707		229484	6	Find by Molecular Feature											93.5
TRUE	2	BW2.d	DBSearch	Gibberellin A37 glucosyl ester	C26 H36 O10			10.293	507.222	508.229	94.9		94.9				2.96		Negative	5	12626		192310	10	Find by Molecular Feature											100
TRUE	2	SW1.d	DBSearch	Gibberellin A37 glucosyl ester	C26 H36 O10			10.29	507.222	508.229	95.55		95.55				2.86		Negative	7	19530		321540	10	Find by Molecular Feature											100
TRUE	2	BW1.d	DBSearch	Cafamarine	C26 H36 O10			10.296	507.223	508.23	97.02		97.02				1.72		Negative	3	11075		145042	10	Find by Molecular Feature											95.7
TRUE	1	SW0.d	DBSearch	Cafamarine	C26 H36 O10			10.287	507.223	508.23	98.59		98.59				1.19		Negative	7	21248		362181	10	Find by Molecular Feature											100
TRUE	2	BW0.d	DBSearch	Cafamarine	C26 H36 O10			10.295	507.223	508.23	98.81		98.81				1.09		Negative	5	14356		218664	10	Find by Molecular Feature											100
TRUE	2	SW4.d	DBSearch	Cafamarine	C26 H36 O10			10.288	507.223	508.231	99.58		99.58				0.29		Negative	4	16783		290599	10	Find by Molecular Feature											100
TRUE	2	BW30.d	DBSearch	Cafamarine	C26 H36 O10			10.304	507.223	508.231	99.44		99.44				0.34		Negative	3	12973		178998	10	Find by Molecular Feature											100
TRUE	2	SW2.d	DBSearch	Cafamarine	C26 H36 O10			10.288	507.223	508.231	99.81		99.81				0.26		Negative	7	24459		477771	10	Find by Molecular Feature											100
TRUE	2	SW30.d	DBSearch	Cafamarine	C26 H36 O10			10.285	507.224	508.231	99.33		99.33				0.35		Negative	7	22399		362451	10	Find by Molecular Feature											100
TRUE	12	PW0.d	DBSearch	LysoPE(0:0/16:0)	C21 H44 N O7 P			10.577	512.299	453.284	80.61		80.61				2.5		Negative	3	6348		77261	1	Find by Molecular Feature											100

## Sheet: CPM PB & BW
Mass (avg)	Group	RT (Tgt)	RT (med)	Found	Missed	Score (Tgt, max)	%RSD (Tgt)	%RSD (MFE)	Score (MFE, max)	Height (min)	Height (med)	Height (max)	Area (min)	Area (med)	Area (max)	RT (avg)	Mass (Tgt)	Mass (med)	RSD (Mass, ppm)	RT Diff	Saturated	RT (span)	RT (max width)	Area (avg)	Ions (min)	Ions (max)	Single Ion	Height (avg)	Volume (avg)	DT	Ω (Å²)	Time Segment
108.056	11	9.861	9.902	14	0	84.8	8.7	9.1	70.8	6168	15269	34711	81116	718680	1394238	9.914	108.057	108.055	3.48	0.041	0	0.155	2.15	731092	2	2		17444				1
110.039	159	6.595	6.587	4	10	75.4	37.2	14.1	92.5	1877	3826	4955	25797	44362	62201	6.586	110.039	110.039	9.28	-0.008	0	0.015	0.783	44181	1	2	2	3621				1
117.059	214	7.122	7.106	10	4	86.4	6.7	57.8	100	1978	3174	4904	11678	20925	36283	7.105	117.059	117.059	3.08	-0.016	0	0.03	0.266	23220	2	2		3439				1
118.064	44	6.253	6.244	11	3	88	27.7	39.6	100	1320	11683	17559	1167	151828	223405	6.249	118.064	118.064	7.35	-0.009	0	0.068	0.949	139851	1	2	1	11366				1
118.065	126	5.599	5.593	4	10	77.7	26.2	8.9	100	1940	3881	4468	16249	49312	54277	5.595	118.066	118.065	3.12	-0.005	0	0.046	0.557	42288	1	2	1	3542				1
120.06	145	7.244	7.23	4	10	86.2	6.5	9.1	100	2900	4921	6429	15838	47868	61074	7.227	120.06	120.06	5.14	-0.014	0	0.029	0.483	43162	2	2		4793				1
122.038	30	7.224	7.225	4	10	88	2.1	80.5	100	16604	29973	38985	129349	268650	345253	7.227	122.038	122.038	4.46	0.002	0	0.013	0.749	252975	2	2		28884				1
126.034	95	7.811	7.842	4	10	85.3	17.9	23.9	76.7	1199	3484	4727	15504	67956	90394	7.835	126.034	126.034	9.71	0.03	0	0.12	0.799	60453	2	2		3223				1
126.035	103	6.394	6.43	2	12	81	2.6	44.8	87.4	2725	3385	4045	56962	65787	74613	6.43	126.035	126.035	1.73	0.037	0	0.023	0.716	65787	2	2		3385				1
130.064	17	7.801	7.81	10	4	88.1	1.8	14.6	100	8132	14319	21368	250671	456053	695511	7.831	130.064	130.064	1.12	0.009	0	0.229	1.729	471782	2	2		14634				1
135.068	25	7.693	7.699	11	3	87.5	36.5	10.5	100	1315	1899	31301	7614	13815	395341	7.707	135.069	135.068	7.13	0.006	0	0.105	0.966	124639	1	2	5	10810				1
139.065	83	5.444	5.49	3	11	86.7	6	152.1	94.3	3672	5122	7024	52852	64853	111155	5.49	139.066	139.065	1.64	0.047	0	0.027	0.633	76287	2	2		5273				1
139.066	260	7.485	7.475	4	10	68.4	35.2	5.2	99.1	1834	3839	4527	7527	25256	29175	7.477	139.067	139.066	6.71	-0.01	0	0.013	0.283	21804	1	2	3	3510				1
143.062	182	5.228	5.223	4	10	65	17.6	5.4	100	1226	2732	3208	10847	32497	50091	5.22	143.062	143.062	2.3	-0.005	0	0.054	0.799	31483	1	2	3	2475				1
143.074	213	8.588	8.574	4	10	84.1	23.7	8.9	97.6	3482	3555	4326	10937	28491	37486	8.576	143.076	143.074	9.33	-0.014	0	0.013	0.4	26351	2	2		3729				1
144.082	198	7.182	7.17	4	10	87	35.4	9.3	100	2436	4115	5054	16120	31015	41352	7.169	144.082	144.082	5.38	-0.012	0	0.015	0.45	29875	1	2	1	3930				1
146.065	157	6.811	6.806	3	11	71.3	32.9	1.9	98.5	2831	4290	4850	25631	35018	37161	6.805	146.064	146.064	13.98	-0.005	0	0.006	0.3	32603	2	2		3990				1
146.069	12	7.664	7.662	14	0	87.1	37.1	11.8	100	1054	2246	83469	5867	14064	875401	7.667	146.07	146.069	6.7	-0.002	0	0.073	0.816	186173	1	3	7	20350				1
149.051	134	7.131	7.097	4	10	83.4	30.1	25.4	100	2545	2926	3823	25949	53092	75595	7.102	149.051	149.051	5.61	-0.034	0	0.036	1.099	51932	1	2	1	3055				1
150.056	193	6.472	6.455	4	10	83.7	30.1	0.5	100	1898	4113	5301	8591	27568	41054	6.461	150.058	150.057	6.59	-0.016	0	0.046	0.3	26195	2	2		3856				1
151.067	174	6.796	6.78	4	10	85.5	45	1	100	1818	3817	5248	13327	29955	44348	6.782	151.067	151.067	9.11	-0.015	0	0.021	0.321	29396	1	3	1	3675				1
151.067	55	7.125	7.107	4	10	83.5	6.6	4.2	100	9288	14706	19711	77061	129649	169412	7.106	151.067	151.067	6.73	-0.018	0	0.008	0.489	126443	2	2		14603				1
152.052	247	7.014	7.006	3	11	58.4	47.6	8.3	77.1	1702	2587	2870	8622	13562	15427	7.005	152.055	152.052	6.66	-0.008	0	0.006	0.15	12537	1	2	1	2386				1
152.121	86	9.482	9.461	10	4	87.7	2.1	0	100	6489	8274	11557	59798	78048	97410	9.462	152.12	152.121	1.3	-0.021	0	0.02	0.466	76186	2	2		8512				1
154.03	94	6.59	6.587	4	10	88	20	1.8	100	3574	7337	10269	26079	60420	87186	6.586	154.03	154.03	9.7	-0.003	0	0.018	0.416	58526	2	2		7129				1
157.077	151	7.037	7.023	4	10	68.2	37.5	1.9	100	3384	5268	7584	18753	41923	43026	7.023	157.078	157.078	6.53	-0.014	0	0.008	0.416	36406	1	2	2	5376				1
159.093	97	7.093	6.925	11	3	87.3	91.6			221	359	9241	110	930	116144	6.983	159.094	159.094	14.03	-0.168	0	0.19	0.433	27640	0	2	7	2526				1
159.093	189	6.94	6.894	13	1	87.5	58.3			227	423	7658	227	1062	42099	6.9	159.094	159.094	10.36	-0.046	0	0.107	0.167	10282	0	2	9	1948				1
159.094	136	6.219	6.199	4	10	86.1	6.4	0.7	100	2654	4739	6767	15575	45525	68666	6.199	159.094	159.094	3.63	-0.02	0	0.024	0.578	43823	2	2		4725				1
160.074	104	7.511	7.506	4	10	79.6	6.8	138.8	100	4655	7918	11957	37063	62732	85191	7.51	160.074	160.075	8.69	-0.005	0	0.024	0.283	61929	2	2		8112				1
163.035	280	6.043	6.042	3	11	67.8	22.4	69.1	98.9	1602	1945	2097	13690	15686	30708	6.039	163.035	163.035	1.38	-0.001	0	0.03	0.465	20028	1	2	2	1881				1
165.081	75	5.763	5.766	14	0	87.6	17.9	2.8	100	2210	5973	9205	23314	81153	144241	5.768	165.08	165.081	7.8	0.002	0	0.084	0.999	80318	2	2		5807				1
166.053	34	6.072	6.055	4	10	87.4	6.9	57.1	100	4703	17228	27268	50891	188831	274066	6.053	166.053	166.053	4.52	-0.017	0	0.015	0.733	175655	2	2		16607				1
169.042	73	6.496	6.449	4	10	77.5	42.6	40.2	84.6	1087	2419	7832	5787	31203	134370	6.448	169.043	169.043	8.18	-0.047	0	0.024	0.899	50641	1	2	2	3439				1
169.998	36	7.75	7.681	10	4	83.3	30.2	39.2	77.7	2169	3741	6650	52106	143047	304417	7.731	169.998	169.998	6.07	-0.069	0	0.478	1.429	152905	1	2	1	4093				1
173.109	211	6.969	6.954	4	10	78.4	19.1	1.3	100	1938	3464	5255	11611	25327	32403	6.952	173.109	173.109	5.63	-0.015	0	0.015	0.283	23667	2	2		3530				1
173.996	15	8.598	8.618	10	4	61.3	4.5	47.3	73.8	1848	6910	14615	17361	82084	195893	8.619	173.999	173.996	1.28	0.02	0	0.077	0.516	93244	2	2		7513				1
174	28	8.16	8.176	12	2	87.9	11.2	20.3	100	2628	13276	22285	14165	161613	359771	8.194	173.999	173.999	5.57	0.016	0	0.184	0.649	158280	2	2		12733				1
174.088	202	8.023	8.016	14	0	84.8	60.8	50.2	100	1060	1384	3801	2221	9134	39107	8.015	174.089	174.087	11.24	-0.008	0	0.089	0.35	14353	1	2	10	1821				1
176.071	84	7.218	7.198	4	10	79.8	38.8	88.2	100	2139	3888	11182	8561	27706	96021	7.202	176.073	176.071	4.87	-0.02	0	0.041	0.316	39999	2	3		5274				1
178.034	120	5.503	5.498	4	10	74.4	26.9	24.8	90.5	1587	3066	5351	12001	50178	98838	5.499	178.035	178.034	1.4	-0.005	0	0.054	0.933	52799	1	2	2	3268				1
179.058	4	7.696	7.683	14	0	87.4	12.9	5.8	100	2879	7980	239737	20334	59905	2509937	7.702	179.059	179.058	7.12	-0.013	0	0.092	0.966	615600	2	4		59812				1
181.051	105	7.745	7.736	4	10	52.4	68.7		72.8	2375	3878	4801	6232	22801	42821	7.739	181.048	181.051	9.98	-0.009	0	0.032	0.283	23664	1	3	1	3733				1
181.068	169	7.802	7.861	4	10	58.1	34.7	1.6	86.3	1967	2514	3191	5454	21223	26165	7.847	181.069	181.069	13.87	0.059	0	0.082	0.3	18517	3	4		2547				1
182.058	20	7.034	7.036	14	0	87.9	50.7	2.3	100	1239	2150	50240	7147	17996	448883	7.084	182.06	182.057	7.14	0.002	0	0.232	0.733	100591	1	4	5	11289				1
183.054	39	5.467	5.478	5	9	88	52.9	59	99.3	1078	7591	16674	10572	137688	282641	5.473	183.055	183.054	6.9	0.01	0	0.084	0.966	117036	1	2	2	7140				1
188.105	67	8.433	8.422	14	0	86.7	23.4	15.4	100	1765	3431	17492	14596	26666	132219	8.43	188.105	188.105	9.66	-0.01	0	0.075	0.516	39545	1	2	1	5291				1
189.046	172	7.707	7.723	4	10	70.4	30.4	0.3	100	2508	3906	4120	27849	40717	44066	7.718	189.045	189.046	11.97	0.016	0	0.024	0.5	38337	2	2		3610				1
189.992	52	8.09	8.173	12	2	80.8	48.8	43.1	96.4	1374	3212	11152	19484	76253	282155	8.158	189.995	189.992	4.74	0.083	0	0.391	1.217	110728	1	2	3	4121				1
189.998	77	6.694	6.774	4	10	78.5	29	20.8	97.8	3383	4156	4754	66441	99264	140561	6.748	189.999	189.999	10.26	0.081	0	0.16	0.966	101383	2	2		4112				1
192.064	215	7.484	7.457	2	12	73.1	9.9	115.5	100	3636	3764	3893	23997	28623	33249	7.457	192.066	192.064	0.78	-0.027	0	0.037	0.25	28623	2	2		3764				1
193.993	89	6.008	6.055	4	10	82.5	24.4	12.7	81.1	2171	3052	4744	56325	80802	108734	6.045	193.994	193.994	6.37	0.047	0	0.152	1.059	81666	1	2	1	3255				1
195.054	292	8.287	8.271	4	10	72.9	35.2	20.2	97	1765	2335	2857	10857	17807	22345	8.272	195.055	195.053	9.28	-0.015	0	0.031	0.361	17204	2	2		2323				1
195.055	9	7.079	7.084	14	0	94.8	37.6	37.6	100	496	1150	138275	1454	7111	1197528	7.088	195.056	195.055	6.77	0.006	0	0.06	0.716	254764	1	7	1	29191				1
195.057	19	6.79	6.774	6	8	88.1	50.3	0	100	238	26659	54696	902	197245	433268	6.77	195.058	195.057	8.62	-0.016	0	0.048	0.362	190869	1	4	2	24632				1
195.181	233	7.129	7.159	2	12	51.6	81.7	17.2	79.6	1278	1524	1769	3189	3382	3574	7.159	195.181	195.181	18.38	0.03	0	0.032	0.067	3382	1	2	1	1524				1
196.065	319	6.426	6.425	3	11	80.2	10.7	66.7	100	1541	2723	2921	10289	16835	20347	6.422	196.065	196.065	0.58	-0.001	0	0.03	0.245	15824	2	2		2395				1
196.111	16	9.484	9.464	11	3	99.9	12.2	22.7	100	1259	58873	74081	9876	538950	693976	9.469	196.111	196.111	2.38	-0.02	0	0.072	0.816	495848	2	3		54070				1
198.058	207	5.505	5.515	4	10	80.2	33.8	0.9	100	1200	2515	3749	14769	39422	57623	5.512	198.059	198.059	5.23	0.009	0	0.038	0.683	37809	1	2	1	2495				1
198.09	196	8.4	8.387	4	10	83.6	16.7	60.2	93.1	1147	2233	4915	8006	17700	39935	8.384	198.09	198.09	9.18	-0.013	0	0.021	0.4	20835	2	2		2632				1
201.135	122	9.002	9.032	4	10	83.3	74.8	73.8	91.2	4043	5359	9329	26049	33326	52347	9.034	201.137	201.136	10.8	0.03	0	0.03	0.366	36262	1	2	2	6022				1
202.031	56	10.662	10.818	12	2	81.7	23.2	51	100	1059	1960	5228	5674	58559	208789	10.766	202.031	202.031	1.7	0.155	0	0.34	1.586	88957	1	2	4	2706				1
202.031	131	10.789	10.837	12	2	87.7	25.3	45.1	99.5	1059	3064	5265	14702	47136	212157	10.833	202.031	202.031	1.64	0.048	0	0.16	1.587	73882	1	2	4	2969				1
202.12	250	8.775	8.837	3	11	60.7	20	90.5	100	1697	1835	2558	15992	16262	22070	8.828	202.121	202.12	9.27	0.062	0	0.035	0.383	18108	1	2	1	2030				1
204.093	14	7.12	7.111	14	0	99.9	24.2	2.6	100	5573	46301	85732	40862	308575	617294	7.124	204.092	204.092	6.86	-0.009	0	0.075	0.383	285041	2	6		41731				1
205.073	240	8.431	8.414	14	0	62.4	34.9	15.3	100	1864	3008	3789	10566	21912	30733	8.472	205.075	205.072	7.64	-0.017	0	0.249	0.366	20310	1	2	2	2851				1
205.993	38	6.389	6.498	4	10	84.5	24.7	51.6	77.9	2276	5456	10247	64563	139041	227405	6.486	205.994	205.994	7.65	0.109	0	0.197	0.899	142513	2	2		5859				1
208.009	32	7.214	7.223	4	10	87.4	16.3	34.2	100	4819	8727	16591	74364	79675	343232	7.239	208.009	208.009	6.43	0.009	0	0.108	0.966	144236	3	3		9716				1
208.147	171	10.342	10.318	11	3	85	7.4	17	100	2296	3159	3834	27248	40217	44451	10.321	208.147	208.147	1.11	-0.024	0	0.079	0.583	36838	2	2		2997				1
212.073	253	7.019	7.007	4	10	85.6	32.9	2.5	100	1528	3157	4652	8565	19832	30026	7.006	212.074	212.074	6.8	-0.012	0	0.008	0.292	19564	2	2		3124				1
212.106	29	8.148	8.131	10	4	88	0.6	0.1	100	20226	33807	44084	159392	256629	333813	8.131	212.106	212.106	1.36	-0.017	0	0.012	0.717	246034	2	2		32480				1
213.007	13	9.543	9.566	14	0	98.4	83.4	21	87.5	2108	3712	32850	51989	128183	1211827	9.595	213.011	213.007	4.94	0.023	0	0.317	2.164	368015	1	3	6	10107				1
217.1	117	4.793	4.792	4	10	85.2	29.5	18.5	100	1226	3285	4104	15445	65075	76079	4.787	217.101	217.101	3.42	-0.001	0	0.042	0.849	55419	1	2	1	2975				1
218.117	279	8.1	8.011	4	10	78	30.6	56.9	95.4	1250	1696	3624	7795	10454	21554	8.01	218.118	218.118	7.65	-0.089	0	0.235	0.266	12564	2	2		2067				1
219.109	21	6.192	6.205	9	5	87.4	98.9	40.8	100	1030	1700	43662	4520	13669	395883	6.211	219.112	219.109	9.59	0.013	0	0.076	0.566	100874	1	4	5	11569				1
222.005	123	7.128	7.105	4	10	58.3	28.4	76.4	76.6	1165	2012	4018	28442	45604	87324	7.106	222.004	222.005	5.62	-0.023	0	0.029	1.066	51743	1	2	2	2302				1
222.162	194	10.169	10.159	8	6	86.4	15	13.2	100	1206	1979	5477	8096	11715	40029	10.156	222.162	222.162	0.81	-0.01	0	0.041	0.366	16916	2	2		2334				1
224.142	352	10.248	10.242	10	4	74.3	9.1	7.1	100	1214	1604	2369	8721	13324	18102	10.241	224.142	224.142	2.47	-0.006	0	0.064	0.3	13268	2	2		1733				1
225.069	88	7.209	7.192	4	10	83.6	17.8	0	100	6266	9832	11918	53753	81153	95086	7.194	225.07	225.069	6.7	-0.017	0	0.013	0.483	77786	2	2		9462				1
226.099	70	6.83	6.816	4	10	85.3	27.5	40.2	100	3757	4708	13329	30968	41091	127026	6.815	226.101	226.1	9.03	-0.014	0	0.023	0.483	60044	2	2		6625				1
228.115	234	6.613	6.739	4	10	83.5	51.3	25.6	100	1179	2038	3217	5328	24965	48583	6.74	228.116	228.116	8.61	0.126	0	0.336	0.866	25960	1	2	1	2118				1
229.01	27	7.125	7.107	4	10	87	14.4	12.8	100	11663	13727	21263	174428	223798	383099	7.106	229.01	229.01	6.5	-0.019	0	0.008	0.737	251280	2	2		15095				1
231.019	242	7.114	7.102	3	11	62.9	24.9	7.6	98	1471	1921	2539	14498	15118	23240	7.105	231.02	231.019	5.96	-0.013	0	0.064	0.45	17619	1	2	1	1977				1
231.115	411	7.873	7.881	2	12	50.7	19.4	72.5	87.7	1152	1260	1369	8664	9640	10616	7.881	231.114	231.115	6.74	0.008	0	0.014	0.283	9640	1	2	1	1260				1
231.127	91	4.943	4.927	4	10	82	18.3	9.7	98.7	1116	2258	5609	15037	44517	109235	4.937	231.128	231.127	4.13	-0.016	0	0.046	1.066	53326	2	2		2810				1
233.094	102	6.328	6.324	4	10	87.2	37.4	0.4	100	2154	7085	9834	17688	63486	87766	6.332	233.095	233.095	8.16	-0.004	0	0.041	0.55	58106	3	5		6540				1
234.019	212	7.733	7.691	3	11	53.9	38.2	8.1	77.5	2348	2427	3180	12026	13298	53254	7.688	234.022	234.019	4.8	-0.043	0	0.07	0.416	26193	2	2		2652				1
234.023	222	7.162	7.181	4	10	64.1	23.6	34.6	80.8	1578	1752	2664	24808	31087	75993	7.165	234.024	234.023	3.98	0.019	0	0.081	0.949	40743	2	2		1937				1
237.113	204	10.164	10.15	7	7	87.4	20.6	30	100	1329	1544	4876	8688	10683	37968	10.153	237.114	237.114	2.47	-0.014	0	0.027	0.35	16673	1	2	1	2209				1
238.133	294	8.687	8.68	4	10	74	45.2	12.2	85.5	1259	2145	3611	6969	11467	24822	8.68	238.133	238.133	10.65	-0.007	0	0.024	0.3	13681	1	2	2	2290				1
239.981	82	7.694	7.701	3	11	74.7	29.2	66.8	98.6	1585	1925	9793	19686	23357	166632	7.7	239.981	239.982	6.54	0.007	0	0.046	0.949	69891	1	2	1	4434				1
240.101	3	9.483	9.468	14	0	100	22.5	11.9	100	1805	198886	283493	14582	1731121	2439267	9.482	240.101	240.101	5.62	-0.016	0	0.088	0.714	1343300	2	5		155010				1
242.126	106	7.648	7.533	4	10	84.9	22.3	110.5	100	2559	5305	8487	22767	68219	109907	7.56	242.128	242.127	6.79	-0.115	0	0.13	0.633	67278	2	2		5414				1
243.025	160	7.791	7.781	4	10	67.9	33	3.3	100	2277	2431	3323	20962	28824	37441	7.772	243.026	243.026	10.67	-0.01	0	0.058	0.35	29013	2	2		2615				1
243.184	133	9.172	9.158	11	3	88	9.8	35.9	100	1455	4105	7939	10068	30291	60334	9.163	243.184	243.184	2.23	-0.014	0	0.099	0.383	30898	2	2		4211				1
244.087	108	8.588	8.574	4	10	86	31.6	1.2	100	7553	8261	9715	57674	61859	74766	8.576	244.089	244.087	11.93	-0.013	0	0.02	0.4	64039	2	3		8448				1
244.142	161	7.88	7.867	4	10	81.3	66.3	37.4	100	1171	2426	5910	6566	20089	45752	7.872	244.144	244.142	13.75	-0.014	0	0.053	0.316	23124	1	2	1	2983				1
245.004	49	6.305	6.316	4	10	86.9	23.9	0	100	5681	6388	7757	66843	131863	149578	6.324	245.006	245.005	7.94	0.011	0	0.124	1.39	120037	2	2		6554				1
246.105	303	8.633	8.622	4	10	63.8	56.2	19.8	96.3	2139	2524	2758	2446	16544	19438	8.622	246.103	246.105	10.72	-0.011	0	0.026	0.266	13743	2	2		2486				1
246.126	178	6.631	6.597	4	10	86.4	197.4			729	1771	3792	5307	17434	42235	6.607	246.127	246.126	7.8	-0.034	0	0.054	0.266	20603	0	2	2	2015				1
246.126	302	6.859	6.855	4	10	63.1	183.2			812	1842	3287	4304	13822	24350	6.852	246.127	246.127	8.93	-0.004	0	0.021	0.233	14074	0	2	1	1946				1
246.127	221	5.339	5.324	3	11	73	9	6.8	98.2	1696	2029	2908	18632	23170	35264	5.329	246.128	246.127	1.9	-0.015	0	0.023	0.576	25688	2	2		2211				1
249.102	377	7.379	7.385	3	11	57.6	32.3	182.3	97.3	1150	1581	1635	4868	5283	9438	7.383	249.105	249.103	9.11	0.006	0	0.019	0.2	6530	2	2		1455				1
250.019	61	7.688	7.732	4	10	97.5	10.9	10.6	92.8	1867	4783	6215	20032	35603	109575	7.71	250.019	250.019	4.56	0.044	0	0.127	0.739	50203	3	3		4412				1
250.074	309	6.607	6.597	4	10	83.8	47.9	7.3	100	1056	2694	3195	6244	15794	23471	6.598	250.075	250.075	10.16	-0.01	0	0.021	0.266	15326	2	2		2410				1
251.082	239	7.891	7.856	4	10	81.8	31	2.6	100	1787	2247	3085	15098	22592	32036	7.856	251.083	251.082	9.97	-0.035	0	0.008	0.366	23080	2	2		2341				1
252.125	394	7	6.989	1	13	67.2		141.4	91.2	1598	1598	1598	10362	10362	10362	6.989	252.126	252.125		-0.011	0	0	0.216	10362	2	2		1598				1
254.095	155	6.811	6.804	4	10	86.8	26	6.7	98.6	1467	1894	7737	7254	10472	49118	6.806	254.096	254.095	6.92	-0.007	0	0.035	0.216	19329	2	2		3248				1
254.131	175	6.924	6.908	3	11	51.3	23	13.2	100	3292	5915	8542	23231	40606	43400	6.911	254.13	254.132	12.72	-0.016	0	0.013	0.266	35746	2	2		5916				1
256.096	7	8.145	8.133	10	4	99.9	0.3	0	100	90515	161336	225043	642250	1148901	1554862	8.132	256.096	256.096	0.87	-0.013	0	0.017	0.566	1120667	5	6		160544				1
256.235	153	8.147	8.243	3	11	51.4	17.3	41.2	81	1061	1692	1825	1690	2234	2307	8.203	256.238	256.236	3.89	0.096	0	0.173	0.083	2077	1	2	2	1526				1
256.241	246	11.401	11.411	9	5	80.9	10.6	28.8	93.1	1042	1383	1890	13719	26621	29578	11.41	256.241	256.241	0.95	0.01	0	0.143	0.633	24982	2	2		1432				1
260.136	313	7.002	6.983	10	4	81.6	62.4	23.4	100	1040	1608	2893	7341	10624	22756	6.962	260.139	260.136	7.5	-0.019	0	0.129	0.266	12283	1	2	3	1688				1
262.082	245	9.516	9.509	10	4	70.3	15	43.2	100	1248	1571	2537	3740	18471	30343	9.495	262.082	262.082	2.54	-0.007	0	0.115	0.483	19763	1	3	3	1698				1
262.098	141	7.703	7.655	3	11	80.2	48.3	89.3	76.5	1474	1916	4187	2747	15939	18358	7.657	262.101	262.097	7.79	-0.048	0	0.035	0.266	12348	2	2		2526				1
264.111	1	7.664	7.661	14	0	98.5	14.2	0	100	3969	9346	768680	30430	67383	6957327	7.669	264.112	264.11	9.02	-0.003	0	0.073	0.733	1542316	2	7		175317				1
266.12	370	9.292	9.275	1	13	74.6		11.9	99	1555	1555	1555	13114	13114	13114	9.275	266.12	266.12		-0.017	0	0	0.266	13114	2	2		1555				1
266.131	251	8.399	8.381	2	12	79.9	78.3	21.3	93.2	1381	2557	3733	8303	19143	29982	8.381	266.129	266.131	12.17	-0.018	0	0.014	0.333	19143	2	2		2557				1
268.132	72	10.252	10.234	10	4	97.9	9	19.7	100	7252	10368	13615	65721	89346	116968	10.234	268.132	268.132	0.56	-0.018	0	0.036	0.566	90416	2	3		10464				1
270.081	168	7.564	7.553	4	10	79.5	35.2	91.3	100	1800	4495	6812	7730	28511	43737	7.56	270.081	270.082	10.06	-0.011	0	0.052	0.216	27122	2	2		4400				1
270.127	264	6.838	6.831	4	10	83.6	51.2	19.5	100	1464	3139	4252	4918	19760	31534	6.831	270.128	270.127	11.01	-0.007	0	0.014	0.266	18993	1	2	2	2998				1
270.158	90	8.458	8.439	4	10	85.9	74.5	9.1	92.3	6869	8805	14307	56229	61028	81726	8.443	270.162	270.158	11.49	-0.019	0	0.024	0.483	65003	1	2	1	9697				1
274.157	312	7.253	7.24	4	10	87.1	44.9	6.7	100	461	1775	2798	1307	11624	21173	7.244	274.158	274.158	6.07	-0.013	0	0.024	0.266	11432	1	2	1	1702				1
276.084	278	6.042	6.042	3	11	81.4	28.8	20.1	98.5	1506	1753	1825	17017	21471	24001	6.039	276.085	276.084	4.34	0	0	0.037	0.416	20830	2	2		1695				1
276.117	144	7.614	7.607	2	12	84.4	43.7	34.1	100	1257	4575	7892	8008	31639	55270	7.607	276.119	276.117	7.51	-0.007	0	0.004	0.333	31639	2	2		4575				1
277.07	325	6.57	6.556	1	13	52.9		26.6	100	2320	2320	2320	17378	17378	17378	6.556	277.07	277.07		-0.014	0	0	0.217	17378	2	2		2320				1
280.105	296	7.627	7.709	3	11	72.8	23.8		80	1945	2068	4055	8946	11285	20864	7.7	280.104	280.105	3.61	0.082	0	0.046	0.3	13698	2	2		2690				1
280.111	85	6.709	6.69	4	10	87.6	29	0.2	100	3866	8093	11982	24351	70276	92848	6.69	280.113	280.112	9.59	-0.018	0	0.008	0.433	64438	2	3		8008				1
280.241	266	11.009	10.963	9	5	71	9.8	40.7	98.5	1134	1327	1484	19287	19869	25481	10.981	280.241	280.241	1.6	-0.046	0	0.113	0.6	21144	2	2		1299				1
284.081	147	6.094	6.093	4	10	87.8	29.1	18.3	100	1470	3979	6312	10684	35793	55615	6.09	284.082	284.081	4.35	-0.001	0	0.03	0.383	34472	2	2		3935				1
284.093	45	8.063	8.075	4	10	86.2	22.7	129.2	100	14251	14561	21507	108486	114021	172597	8.076	284.092	284.093	11.36	0.012	0	0.013	0.483	127281	3	3		16220				1
284.272	337	12.44	12.494	3	11	59.2	2.1	26.4	94.5	1018	1121	1215	22609	25995	28704	12.479	284.272	284.272	0.98	0.055	0	0.119	0.816	25769	2	2		1118				1
285.103	223	6.333	6.317	4	10	77.6	54.1	2.5	100	1771	3091	4974	12501	23865	37975	6.319	285.103	285.104	8.49	-0.017	0	0.027	0.316	24551	1	2	1	3232				1
286.078	148	3.648	3.659	4	10	77.2	25	9.7	100	1156	2249	3491	12357	39943	83223	3.672	286.077	286.078	3.45	0.011	0	0.058	1.299	43867	1	2	1	2287				1
288.034	107	9.357	9.372	4	10	77.6	38.4	9.6	71.2	1577	3709	6637	33799	64043	155895	9.363	288.035	288.034	9.92	0.015	0	0.074	1.082	79445	2	2		3908				1
288.135	124	7.612	7.59	4	10	73.1	31.6	18.2	100	3170	5948	8120	23204	46587	64416	7.593	288.138	288.135	6.94	-0.021	0	0.023	0.383	45198	2	4		5797				1
289.094	336	9.186	9.173	2	12	65.3	24.2	56.5	78.2	1401	1980	2559	11925	15425	18925	9.173	289.098	289.094	5.65	-0.014	0	0.004	0.283	15425	2	2		1980				1
289.132	295	4.591	4.624	1	13	51.6		141.2	84	1891	1891	1891	29770	29770	29770	4.624	289.132	289.132		0.033	0	0	0.566	29770	3	3		1891				1
294.183	232	10.694	10.685	8	6	86.9	17.9	35	100	1623	2048	2417	11653	18353	24237	10.683	294.184	294.183	2.95	-0.009	0	0.035	0.482	19133	2	2		2037				1
294.183	23	10.172	10.158	11	3	99.7	9.4	21.5	100	1648	11382	40261	13484	87888	328516	10.162	294.184	294.183	0.91	-0.013	0	0.06	0.799	110591	2	5		13153				1
296.141	128	7.799	7.786	4	10	84.1	56	4.6	97.9	2028	6063	8376	14407	51553	70889	7.785	296.141	296.141	10.1	-0.013	0	0.018	0.5	47100	1	2	1	5632				1
297.113	146	6.271	6.276	4	10	87.4	16.6	1.1	100	2060	3602	6164	9509	33547	54334	6.278	297.114	297.113	4.73	0.005	0	0.013	0.366	32734	2	2		3857				1
298.109	290	8.512	8.512	2	12	76.5	27.9	30.1	79.9	2856	2975	3093	20245	22712	25178	8.512	298.111	298.109	7.79	0	0	0.011	0.383	22712	2	2		2975				1
300.076	248	6.345	6.331	4	10	87.2	45.2	1	98.8	1101	1647	4916	6485	11103	31413	6.332	300.078	300.077	4.36	-0.013	0	0.019	0.35	15026	1	2	1	2328				1
300.088	334	7.899	7.871	3	11	72.1	27.7	16.3	100	1671	1681	2169	2645	12204	18510	7.871	300.087	300.087	4.59	-0.027	0	0.039	0.283	11120	1	2	1	1840				1
300.138	243	7.058	7.04	4	10	82.3	41.8	5.8	100	1607	3192	3416	8250	19491	29054	7.04	300.139	300.139	7.75	-0.018	0	0.008	0.3	19071	2	2		2852				1
302.007	37	8.233	8.223	2	12	83.7	7.2	86.7	100	6524	7636	8748	144261	147193	150125	8.223	302.008	302.007	1.86	-0.01	0	0.071	1.014	147193	2	3		7636				1
302.071	195	6.43	6.402	3	11	87.2	4.3	20.5	95.2	1832	1837	4212	18004	19504	40082	6.4	302.071	302.071	2.56	-0.028	0	0.019	0.4	25863	2	2		2627				1
303.124	76	7.95	7.939	4	10	98.4	37	0.4	100	7606	10825	13949	57696	78605	105090	7.939	303.125	303.124	9.87	-0.011	0	0.008	0.433	79999	2	4		10801				1
304.085	66	6.823	6.807	4	10	87.3	32.1	0	100	3446	8136	15182	26812	74047	132682	6.806	304.087	304.086	8.97	-0.016	0	0.008	0.55	76897	2	2		8725				1
308.115	227	6.839	6.814	4	10	78.4	42.4	21.7	100	1223	2751	4189	5234	25023	30408	6.819	308.117	308.116	7.62	-0.025	0	0.037	0.35	21422	2	2		2728				1
310.179	284	10.322	10.312	8	6	79.6	13.2	27.4	99.5	1103	1513	2346	9723	17132	33558	10.314	310.179	310.179	2.9	-0.01	0	0.098	0.616	18350	2	2		1511				1
311.128	154	6.708	6.698	4	10	87.9	65.4	2.1	100	3064	7006	9038	19433	37229	51643	6.698	311.13	311.13	10.69	-0.01	0	0.019	0.283	36383	1	2	1	6528				1
312.23	262	11.281	11.267	10	4	85.9	18.6	10	97.7	1097	2058	2725	5283	15477	19016	11.276	312.23	312.23	5.41	-0.014	0	0.049	0.4	14176	2	2		1916				1
315.156	297	8.527	8.488	3	11	70.4	26.2	42.6	90.4	1082	1548	2020	4114	9953	22221	8.487	315.156	315.157	8.97	-0.039	0	0.027	0.35	12096	2	2		1550				1
316.087	158	5.909	5.906	3	11	84.3	41.9	14.2	94.9	1284	1363	4835	16514	17324	68629	5.912	316.087	316.087	5.51	-0.002	0	0.024	0.683	34156	1	2	1	2494				1
318.136	381	8.766	8.762	2	12	55.1	11	18.5	96.8	1432	1467	1502	11620	12393	13167	8.762	318.137	318.136	1.78	-0.004	0	0.011	0.366	12393	1	2	1	1467				1
320.08	41	4.931	4.937	3	11	77.9	26.7	38.7	100	1258	1616	13744	22659	65144	344839	4.952	320.081	320.081	4.16	0.006	0	0.071	1.366	144214	1	3	1	5539				1
320.116	114	7.144	7.138	4	10	86.8	31.6	1.7	100	2105	6778	10087	13091	42464	72359	7.135	320.117	320.117	7.05	-0.006	0	0.021	0.383	42594	2	2		6437				1
320.237	255	12.039	12.044	5	9	84.9	13.3	56.7	100	1240	2053	2403	15855	28264	29636	12.04	320.236	320.237	1.57	0.005	0	0.085	0.583	24990	2	2		1914				1
321.075	87	3.389	3.485	4	10	85.7	24.2	108.4	96.4	1787	4181	4631	37600	65205	82852	3.492	321.075	321.075	1.14	0.095	0	0.158	0.848	62716	2	3		3695				1
325.086	65	7.183	7.188	4	10	87.5	24.3	0	100	5449	10004	12983	56127	101487	136892	7.19	325.087	325.087	7.5	0.005	0	0.029	0.6	98998	2	2		9610				1
325.086	99	5.406	5.383	4	10	85.8	17.9	27.4	100	1705	3115	5335	22461	46958	97774	5.395	325.087	325.086	3.54	-0.023	0	0.074	0.983	53538	2	2		3317				1
327.101	181	7.392	7.39	4	10	82	14.8	0.8	100	1389	3083	5513	10731	22123	33576	7.385	327.101	327.101	6.05	-0.002	0	0.024	0.433	22138	2	2		3267				1
328.107	269	6.47	6.458	4	10	80.4	70.6	4.3	100	1459	2454	3652	7961	16873	26136	6.461	328.109	328.108	7.18	-0.012	0	0.023	0.283	16960	1	2	2	2505				1
329.06	203	5.74	5.731	4	10	67.6	22.7	23.7	90.3	1034	2118	3004	12164	25877	36873	5.732	329.06	329.061	5.41	-0.009	0	0.054	0.583	25198	1	2	3	2069				1
329.083	350	7.092	7.09	4	10	74.4	27.8	13.1	100	1029	1623	2294	3542	9659	13603	7.09	329.084	329.084	9.65	-0.002	0	0.041	0.283	9116	2	2		1642				1
329.164	244	7.187	7.174	4	10	87	32.5	55.9	100	1705	2824	3824	11373	21751	28224	7.177	329.166	329.165	6.11	-0.013	0	0.023	0.266	20775	2	2		2794				1
330.241	371	9.175	9.155	2	12	81.4	10.9	90.9	100	1238	1542	1847	10274	12224	14173	9.155	330.242	330.241	2.9	-0.02	0	0.023	0.283	12224	2	2		1542				1
332.187	35	9.119	9.145	4	10	86.4	42.3	87.7	96.1	5417	10019	32238	48211	89993	284655	9.146	332.185	332.187	10.08	0.026	0	0.021	0.5	128213	1	3	1	14423				1
336.057	116	7.12	6.906	3	11	85.8	58.8	99.7	100	1187	1197	7932	13760	16239	100968	6.981	336.057	336.057	9.46	-0.215	0	0.232	0.516	43655	1	2	1	3439				1
337.081	344	8.041	8.036	4	10	75.8	65.8	6.8	97.7	1698	2136	2585	11819	15714	18550	8.035	337.083	337.081	9.51	-0.005	0	0.015	0.333	15449	1	2	1	2138				1
339.101	186	7.552	7.54	4	10	74.8	39.6	2.9	100	2416	5048	5884	15484	31347	35725	7.543	339.1	339.102	7.71	-0.012	0	0.024	0.25	28476	1	2	2	4599				1
340.106	287	7.866	7.838	1	13	57		141.4	86.9	2706	2706	2706	16786	16786	16786	7.838	340.11	340.106		-0.027	0	0	0.2	16786	2	2		2706				1
342.101	188	7.599	7.583	4	10	82.9	36.3	19.1	99.2	1419	2108	3342	9921	23992	38937	7.602	342.102	342.101	5.11	-0.016	0	0.103	0.433	24210	1	2	1	2244				1
344.081	170	6.648	6.634	4	10	85.7	41.6	7.8	100	1948	4090	5106	13999	34812	44950	6.64	344.083	344.082	8.52	-0.014	0	0.046	0.4	32143	2	2		3809				1
344.082	109	7.176	7.166	4	10	87.7	21.1	0	100	3995	6140	8998	32876	57958	79982	7.165	344.082	344.082	5.93	-0.011	0	0.023	0.462	57194	2	2		6318				1
346.095	219	6.513	6.493	3	11	87.5	85.4	20.9	100	1108	1969	3936	5345	21095	34996	6.497	346.098	346.098	13.65	-0.02	0	0.014	0.416	20478	1	2	1	2338				1
346.162	185	8.367	8.296	11	3	85.7	103.8			237	323	3339	324	848	44280	8.305	346.165	346.161	11.02	-0.071	0	0.186	0.55	10291	0	2	8	1004				1
346.164	314	8.371	8.307	10	4	75.6	152.6			237	309	3339	444	690	33380	8.315	346.17	346.163	10.65	-0.064	0	0.229	0.4	9367	0	2	7	1047				1
348.18	324	8.417	8.421	1	13	61		26.6	99	1857	1857	1857	24894	24894	24894	8.421	348.181	348.18		0.004	0	0	0.5	24894	2	2		1857				1
351.096	57	8.215	8.206	4	10	94.7	59.8	4.1	100	10454	14149	15632	69312	106806	147080	8.205	351.1	351.096	10.01	-0.01	0	0.008	0.599	107501	2	3		13596				1
351.218	413	9.653	9.637	6	8	79.8	26	24.1	98.6	1063	1232	1704	4671	7937	12052	9.636	351.217	351.218	1.93	-0.015	0	0.032	0.267	8395	1	2	4	1293				1
358.091	33	6.809	6.837	4	10	86.6	28.3	89.3	100	10556	20499	33537	90216	179754	255112	6.836	358.093	358.092	7.88	0.028	0	0.018	0.6	176209	2	3		21273				1
360.148	241	8.034	8.013	4	10	59.5	22	22.3	89.4	1367	1710	2334	16145	18780	31507	8.022	360.146	360.148	9.89	-0.02	0	0.086	0.416	21303	1	2	1	1780				1
362.088	326	7.722	7.701	3	11	56.8	89.3	141.4	83.7	1082	1713	3098	2161	4766	11792	7.712	362.091	362.089	18.91	-0.021	0	0.048	0.1	6240	1	2	2	1964				1
362.162	220	8.121	8.114	4	10	73.9	25.3	32.2	89.4	1196	1861	2740	15426	30241	45704	8.114	362.162	362.163	8.84	-0.007	0	0.024	0.742	30403	2	2		1914				1
364.172	300	8.048	8.058	4	10	79.6	29.2	28	100	1414	1525	3257	11690	13547	19514	8.08	364.17	364.172	5.62	0.01	0	0.163	0.383	14575	2	2		1930				1
364.177	286	8.222	8.058	4	10	58.3	22.6	40.7	91.9	1414	1525	3257	20510	23392	43556	8.08	364.177	364.177	8.14	-0.164	0	0.163	0.699	27712	2	2		1930				1
366.148	113	6.323	6.315	4	10	87.4	30.4	1.8	100	2466	6186	9562	13151	46717	68739	6.315	366.151	366.149	8.7	-0.008	0	0.019	0.383	43831	2	2		6100				1
368.166	46	12.17	12.194	10	4	86.4	0.9	47.7	72.3	3419	5543	7856	80819	140897	202836	12.197	368.167	368.166	0.4	0.024	0	0.158	1.449	137969	2	2		5625				1
370.098	163	7.309	7.299	4	10	84.7	37.5	2.9	100	1945	3880	5845	18662	37894	66762	7.298	370.097	370.099	6.39	-0.01	0	0.023	0.683	40303	1	2	1	3888				1
372.11	93	7.467	7.456	4	10	85.5	14.5	0	100	2528	6191	8413	36241	85826	120900	7.456	372.112	372.111	2.82	-0.011	0	0.008	0.949	82198	3	4		5831				1
374.126	385	7.918	7.915	4	10	86.2	194.7			549	1266	1777	4003	9523	11655	7.914	374.127	374.127	10.27	-0.003	0	0.023	0.266	8676	0	2	1	1214				1
374.127	304	8.09	8.073	4	10	69	203.2			966	2204	2793	7605	15781	20752	8.085	374.128	374.127	11.87	-0.018	0	0.058	0.3	14980	0	2	2	2042				1
376.144	317	8.127	8.151	3	11	73.9	81.6	24.2	100	1600	1806	2171	15726	15772	19264	8.132	376.145	376.145	10.03	0.025	0	0.069	0.25	16921	1	2	2	1859				1
377.122	274	7.22	7.205	3	11	70.9	23.7	26	100	2399	3173	4124	16487	21247	23634	7.205	377.12	377.122	1.16	-0.014	0	0.006	0.266	20456	1	2	1	3232				1
377.235	328	9.904	9.896	10	4	85.1	7.8	2.4	100	1113	1476	2235	10973	14098	19610	9.895	377.234	377.235	1.63	-0.008	0	0.085	0.333	14081	2	2		1519				1
378.158	137	7.587	7.558	4	10	76.6	30.1	12.4	100	1793	3039	5041	18429	41867	50831	7.56	378.159	378.159	6.36	-0.029	0	0.013	0.716	38249	2	2		3228				1
379.25	130	10.324	10.309	10	4	86.8	3.4	0.3	100	3495	4538	5541	40792	49898	61813	10.308	379.249	379.25	1.18	-0.015	0	0.063	0.517	50017	2	2		4516				1
380.08	422	6.854	6.837	2	12	75.5	44.7	30.2	94.2	1171	1287	1403	6151	7980	9809	6.837	380.079	380.08	5.94	-0.017	0	0.004	0.266	7980	2	2		1287				1
380.101	347	7.859	7.878	4	10	67	74.7	20.3	94.3	1063	1420	1885	6504	10912	14203	7.868	380.101	380.102	11.16	0.019	0	0.065	0.25	10633	1	2	1	1447				1
380.171	58	8.012	8.003	4	10	89.5	28.4	58.5	100	3553	5231	16517	21263	44574	127311	8.001	380.168	380.171	10.05	-0.009	0	0.015	0.45	59431	3	4		7633				1
381.264	420	10.476	10.48	3	11	59.2	10	32.9	97.5	1005	1165	1192	9154	9277	10687	10.469	381.264	381.264	1.54	0.004	0	0.096	0.267	9706	2	2		1121				1
383.114	166	6.665	6.657	4	10	88.1	66.2	1.5	100	2194	4695	6040	11830	30515	42718	6.657	383.116	383.115	10	-0.008	0	0.008	0.3	28894	1	2	1	4406				1
384.064	139	7.737	7.675	2	12	87.6	103.7		96.5	1571	3049	4527	2793	27647	52500	7.675	384.059	384.064	15.23	-0.062	0	0.035	0.383	27647	2	3		3049				1
384.108	258	7.777	7.757	3	11	70.1	16	3.9	90.4	1248	2338	3329	8045	13842	24026	7.766	384.11	384.108	9.52	-0.02	0	0.037	0.283	15305	2	2		2305				1
384.183	345	8.364	8.184	3	11	52.5	169.3	69.8	95.3	1122	1554	1639	2821	6399	35808	8.243	384.177	384.186	15.55	-0.18	0	0.197	0.583	15009	1	2	2	1438				1
388.178	143	8.801	8.804	3	11	74.5	84.9	12.7	94.3	1174	3066	7433	9410	31612	69108	8.795	388.179	388.176	15.22	0.003	0	0.032	0.55	36710	2	2		3891				1
388.178	316	8.483	8.474	3	11	69	86.5	70.7	97.3	1942	2033	2081	4192	17187	19455	8.566	388.183	388.181	14.31	-0.009	0	0.291	0.3	13611	1	2	1	2019				1
392.293	228	10.613	10.623	9	5	86.1	9.6	11.6	100	1353	1600	2864	11988	18905	33270	10.626	392.293	392.293	1.34	0.011	0	0.038	0.516	22547	2	2		1959				1
395.15	112	6.214	6.208	4	10	85.9	34.5	3.5	100	1630	3583	6501	11842	42973	80172	6.211	395.151	395.151	5.83	-0.006	0	0.023	0.666	44490	2	2		3824				1
398.015	208	10.004	10.02	4	10	63.7	64.6	17.2	87.4	1012	1251	1956	3196	25387	40018	10.012	398.012	398.014	10.96	0.016	0	0.131	0.749	23497	2	2		1368				1
398.214	183	12.158	12.136	4	10	87.6	3.8	27.3	75.6	1049	1237	1266	18731	20288	21014	12.149	398.214	398.215	1.04	-0.022	0	0.143	0.6	20080	2	2		1197				1
399.104	400	7.225	7.205	3	11	53.3	35	36.7	97	1005	1636	1728	8746	9493	14119	7.211	399.103	399.104	6.46	-0.019	0	0.056	0.283	10786	1	2	2	1456				1
400.178	62	7.6	7.587	4	10	87	27.9	56.1	100	4210	9441	15585	31234	87116	115917	7.585	400.181	400.178	8.33	-0.014	0	0.018	0.583	80346	2	2		9669				1
402.191	127	7.629	7.624	4	10	85.5	61.7	4.6	89.6	2564	5008	6353	20917	52440	79905	7.622	402.194	402.192	8.95	-0.006	0	0.039	0.883	51426	2	2		4733				1
404.204	405	7.13	7.107	2	12	57.3	34.7	18.4	91	1292	1378	1463	8650	9153	9655	7.107	404.206	404.204	0.64	-0.024	0	0.031	0.183	9153	1	2	1	1378				1
406.183	59	8.283	8.304	7	7	88	90.7	16.7	100	1133	3165	29997	7108	29625	215210	8.279	406.189	406.182	9.03	0.021	0	0.084	0.633	75160	1	2	2	10258				1
406.19	31	8.266	8.304	7	7	98.5	83	27.7	100	1133	3165	29560	7794	14853	262650	8.279	406.185	406.188	9.78	0.038	0	0.084	0.6	88627	1	3	1	10196				1
408.175	367	10.171	10.162	8	6	82.7	18.9	21.6	100	1011	1396	1734	6849	11292	13679	10.161	408.176	408.175	1.49	-0.009	0	0.049	0.3	10925	2	2		1369				1
408.214	339	8.894	8.886	7	7	76.7	15.3	28.6	97.9	1056	1570	2427	7425	11733	18134	8.886	408.215	408.214	1.32	-0.008	0	0.05	0.283	12434	2	2		1709				1
408.288	176	9.655	9.644	8	6	88	12.1	18.5	100	1065	1918	4977	6582	13432	39812	9.642	408.288	408.288	1.87	-0.011	0	0.031	0.416	20895	2	2		2746				1
412.124	177	6.465	6.451	4	10	97	46.2	0.4	100	1690	3181	5619	6938	22937	38339	6.453	412.126	412.125	7.06	-0.014	0	0.03	0.25	22788	2	3		3417				1
412.137	229	7.088	7.076	4	10	80	52.2	10.1	100	1811	4142	4744	8640	16993	28469	7.077	412.14	412.137	6.15	-0.012	0	0.013	0.216	17774	1	3	1	3709				1
412.209	298	8.528	8.488	1	13	74.8		90.2	85.7	2950	2950	2950	59838	59838	59838	8.488	412.207	412.209		-0.04	0	0	0.899	59838	2	2		2950				1
416.108	397	7.129	7.088	2	12	55.6	2.6	88.3	98.5	1148	1285	1422	8956	9160	9364	7.088	416.108	416.108	2.11	-0.041	0	0.039	0.283	9160	2	2		1285				1
416.14	156	8.866	8.836	4	10	78.8	70.4	6.1	100	1842	2594	3485	8341	18592	26234	8.838	416.145	416.141	10.08	-0.03	0	0.032	0.233	17940	1	2	1	2629				1
416.173	327	7.744	7.807	1	13	65.9		118.6	75.7	2519	2519	2519	25923	25923	25923	7.807	416.173	416.173		0.064	0	0	0.433	25923	2	2		2519				1
416.205	282	8.906	8.894	13	1	81.4	30.5	14.9	100	1097	1671	2485	2445	17310	37241	8.902	416.206	416.206	6.15	-0.012	0	0.142	0.649	17222	2	2		1687				1
418.16	299	7.701	7.722	1	13	74.5		73.9	96.3	2236	2236	2236	18027	18027	18027	7.722	418.159	418.16		0.021	0	0	0.233	18027	2	2		2236				1
418.221	307	9.313	9.387	1	13	70.1		131.2	71.5	1418	1418	1418	19379	19379	19379	9.387	418.221	418.221		0.074	0	0	0.5	19379	2	2		1418				1
418.235	354	10.332	10.314	2	12	72.7	14.6	140.5	95.3	1860	1897	1933	18423	18721	19019	10.314	418.235	418.235	0.88	-0.018	0	0.004	0.333	18721	2	2		1897				1
420.123	423	7.186	7.175	2	12	79.5	141.2		94.9	1516	2015	2515	8343	11301	14260	7.175	420.116	420.123	17.3	-0.01	0	0.002	0.2	11301	1	2	1	2015				1
420.128	332	7.181	7.173	4	10	86.5	47.3	30.2	98.6	1495	2388	3818	6069	15283	20111	7.177	420.13	420.13	10.13	-0.008	0	0.024	0.233	14187	2	2		2522				1
426.188	273	8.523	8.519	2	12	75	34.5	75.8	97.5	1173	1611	2049	12418	22456	32495	8.519	426.189	426.188	4.47	-0.004	0	0.303	0.733	22456	2	2		1611				1
429.183	431	6.267	6.236	1	13	73.3		63.9	84	1356	1356	1356	7959	7959	7959	6.236	429.182	429.183		-0.031	0	0	0.183	7959	2	2		1356				1
430.105	275	7.947	7.921	2	12	83.8	40	12	95.1	1620	2409	3197	23805	33373	42940	7.921	430.102	430.105	5.02	-0.026	0	0.006	0.483	33373	2	2		2409				1
430.163	252	7.116	7.114	9	5	87.1	11.4	47.4	100	1029	1820	4598	4680	10933	26469	7.114	430.163	430.164	1.15	-0.002	0	0.051	0.2	13135	2	2		2267				1
432.114	129	8.132	8.121	4	10	75.7	38.5	6.9	93.2	1488	3527	6628	11554	33303	64419	8.122	432.115	432.113	8.11	-0.011	0	0.029	0.516	35645	2	3		3792				1
432.127	351	9.196	9.111	6	8	55.7	7.9	72.5	84.2	1016	1316	1534	19925	23917	26270	9.126	432.129	432.127	0.85	-0.085	0	0.105	0.766	23367	2	2		1296				1
432.204	200	8.589	8.592	3	11	61.3	46.2	12	75.8	2005	2009	3095	20242	20586	61415	8.595	432.204	432.202	13.24	0.003	0	0.014	0.933	34081	2	2		2370				1
434.129	293	8.782	8.784	3	11	79.1	28.8	44.7	100	1204	2652	3377	2856	23096	27110	8.782	434.129	434.128	3.11	0.002	0	0.014	0.45	17687	1	2	1	2411				1
434.221	54	8.611	8.634	5	9	92.2	54.1	27.5	93.4	1264	6898	12924	8197	76165	152121	8.628	434.217	434.219	8.95	0.023	0	0.038	0.783	73676	2	3		6395				1
437.291	272	11.332	11.308	10	4	81.8	12.9	31.4	84.3	1306	1974	2207	12024	23463	26152	11.307	437.291	437.291	1.39	-0.023	0	0.048	0.516	20613	2	2		1847				1
438.296	270	9.859	9.839	6	8	67.1	12.7	42.4	98.5	1058	1796	2578	6857	13448	30672	9.84	438.298	438.296	2.79	-0.02	0	0.04	0.566	16025	2	2		1769				1
438.298	118	10.513	10.481	10	4	87.8	17	19.5	100	1640	3273	7002	14829	36345	74671	10.481	438.298	438.298	0.77	-0.031	0	0.029	0.516	43163	2	3		4054				1
440.15	398	7.574	7.588	3	11	52.6	5.6	69	99.5	1163	1203	1466	12359	12717	16246	7.588	440.15	440.151	0.42	0.014	0	0.006	0.378	13774	1	2	1	1277				1
440.167	110	8.493	8.478	8	6	92.8	149			203	1277	9807	101	9707	81347	8.46	440.171	440.167	12.3	-0.016	0	0.099	0.366	22326	0	3	3	2868				1
440.171	259	8.74	8.739	4	10	84	200.8			1030	1720	2948	8458	14390	27407	8.738	440.174	440.171	10.09	-0.001	0	0.041	0.25	16161	0	2	1	1854				1
443.169	323	7.75	7.738	3	11	67.1	44.3		100	3207	5333	5761	5327	11926	24396	7.738	443.162	443.17	8.57	-0.011	0	0.008	0.3	13883	2	2		4767				1
443.175	190	7.748	7.736	4	10	80.4	32.2	5.1	100	2330	4075	4511	10409	32582	36007	7.739	443.175	443.176	11.19	-0.012	0	0.035	0.333	27895	2	2		3748				1
444.169	150	9.494	9.497	4	10	87.2	73.6	10.3	100	2160	3422	4788	15792	33869	49616	9.496	444.165	444.168	9.98	0.003	0	0.023	0.466	33287	1	2	1	3448				1
446.206	333	8.475	8.467	3	11	61.5	19.9	21.1	90.7	1154	1658	1790	6434	13807	23980	8.465	446.209	446.208	10.72	-0.008	0	0.019	0.55	14740	2	2		1534				1
447.3	366	9.658	9.668	2	12	73.9	74.1	67.6	83.3	1367	1962	2558	10288	13485	16681	9.668	447.297	447.3	10.93	0.01	0	0.004	0.283	13485	2	2		1962				1
449.315	42	9.795	9.766	10	4	99.3	1	46.8	100	7868	9139	17204	99708	113924	226471	9.766	449.315	449.315	0.44	-0.029	0	0.026	0.833	138473	3	3		10815				1
449.315	201	9.27	9.253	10	4	87.6	6.2	1.2	100	1533	2141	3799	10175	16230	32955	9.255	449.315	449.315	2.81	-0.017	0	0.052	0.35	19898	2	2		2519				1
450.213	338	8.15	8.187	10	4	81.7	116.2			212	457	2566	211	2579	18505	8.188	450.212	450.212	11.44	0.037	0	0.163	0.416	6912	0	2	7	943				1
450.213	210	8.234	8.219	10	4	82.2	120.4			212	457	3019	211	1608	33882	8.221	450.212	450.212	12.05	-0.015	0	0.241	0.5	7519	0	2	7	847				1
450.259	197	11.175	11.185	4	10	80.2	32.1	67.4	100	2039	2785	3315	24078	38655	44597	11.182	450.262	450.259	4.04	0.01	0	0.021	0.783	36496	2	2		2731				1
453.162	430	7.698	7.672	3	11	77.4	49.1	17.1	93	1136	1294	1526	7527	8413	8766	7.677	453.16	453.162	2.5	-0.026	0	0.023	0.25	8235	1	2	1	1319				1
453.285	121	11.038	11.037	10	4	87.3	3	11.6	91.4	3039	3701	4913	38597	49209	61472	11.034	453.286	453.285	0.88	-0.001	0	0.034	0.583	48937	2	2		3853				1
453.286	256	10.521	10.516	10	4	87.2	9.5	3.3	100	1223	1657	3143	11432	16177	27502	10.513	453.286	453.286	1.67	-0.005	0	0.037	0.4	17381	2	2		1862				1
454.192	311	8.597	8.589	4	10	77.4	17.8	12.5	90.5	1655	2234	2440	15792	21680	24346	8.588	454.191	454.191	6	-0.008	0	0.008	0.566	20874	2	2		2141				1
454.293	230	9.653	9.642	6	8	85.2	13	22.4	100	1184	2542	3703	8345	18942	30038	9.64	454.293	454.293	1.55	-0.011	0	0.027	0.416	18821	2	2		2454				1
455.146	418	7.108	7.102	3	11	76.5	27.1	67.4	96	1555	1913	1933	8158	9646	10773	7.1	455.146	455.146	1.42	-0.006	0	0.019	0.216	9525	1	2	1	1800				1
456.064	265	6.845	6.842	3	11	83.5	82.7	8	100	1201	2167	3535	7132	18715	27810	6.846	456.067	456.067	10.57	-0.004	0	0.024	0.333	17885	1	2	1	2301				1
459.174	434	7.688	7.705	1	13	67.4		38	71.2	1148	1148	1148	8165	8165	8165	7.705	459.172	459.174		0.017	0	0	0.233	8165	2	2		1148				1
460.163	98	8.191	8.206	4	10	79.8	32	56.7	100	2475	3616	5855	38687	50286	85779	8.21	460.161	460.163	11.53	0.014	0	0.058	0.649	56259	2	2		3890				1
463.186	321	8.682	8.723	2	12	72.3	0.2	67.3	94.8	1390	1906	2422	10403	15748	21093	8.723	463.186	463.186	6.17	0.04	0	0.004	0.383	15748	2	2		1906				1
463.308	285	11.643	11.613	9	5	83.8	18.6	25.1	100	1008	1277	1660	12488	19152	25510	11.618	463.307	463.308	1.04	-0.03	0	0.063	0.6	18802	2	2		1313				1
464.118	291	6.319	6.325	3	11	86.8	50.3	66.8	100	1443	1612	3603	5636	10749	23733	6.324	464.12	464.12	8.23	0.006	0	0.008	0.366	13372	2	2		2219				1
464.247	358	9.275	9.304	3	11	60.7	38.7	42.9	100	1030	1269	1322	12749	15993	22409	9.298	464.249	464.248	9.39	0.029	0	0.044	0.55	17050	2	2		1207				1
465.159	261	7.826	7.803	4	10	65	58	2.5	100	1441	2334	4354	15112	24217	26682	7.81	465.159	465.16	13.05	-0.023	0	0.115	0.366	22557	2	2		2616				1
465.308	236	9.168	9.147	10	4	83	8.9	10.9	100	1523	2218	3124	11735	18436	29165	9.148	465.309	465.308	2.12	-0.021	0	0.035	0.433	19235	2	2		2260				1
465.323	135	12.295	12.279	10	4	87.2	5	9.1	100	2240	3413	4453	29791	51622	57521	12.283	465.323	465.323	1.1	-0.016	0	0.047	0.867	46175	2	2		3364				1
466.091	322	8.568	8.613	4	10	80.2	24.9	56.3	84.6	1155	1341	1353	12306	19236	42418	8.611	466.09	466.091	1.02	0.045	0	0.064	1.066	23299	2	2		1298				1
466.207	225	7.89	7.888	1	13	61		32.2	100	2611	2611	2611	28927	28927	28927	7.888	466.21	466.207		-0.002	0	0	0.35	28927	2	2		2611				1
466.258	40	9.426	9.416	12	2	98.9	39.3	11.9	100	1025	1546	23036	8100	13007	228098	9.427	466.257	466.257	7.66	-0.01	0	0.087	0.733	74828	1	3	1	7206				1
474.16	179	8.696	8.679	4	10	85.6	26.9	39.3	100	1072	3068	6238	4123	23352	55416	8.68	474.158	474.16	4.32	-0.018	0	0.021	0.5	26561	2	3		3362				1
475.27	415	10.469	10.449	3	11	60.6	12	39.7	100	1082	1229	1243	8895	12718	13015	10.446	475.271	475.27	2.76	-0.02	0	0.036	0.416	11542	2	2		1184				1
477.286	53	10.86	10.857	10	4	87.3	0.6	0	100	8370	10031	12791	83038	104233	130800	10.852	477.286	477.286	0.62	-0.003	0	0.036	0.583	104725	2	2		10037				1
478.189	192	8.205	8.188	3	11	85.1	36.1	25.3	97.3	1783	4002	4027	15052	33640	35726	8.188	478.191	478.19	8.16	-0.017	0	0.006	0.333	28139	2	2		3271				1
478.241	308	8.525	8.501	3	11	76.8	52.1	114.1	78.7	1430	1508	2275	2519	14563	22841	8.476	478.242	478.243	8.04	-0.024	0	0.119	0.433	13308	2	2		1738				1
479.3	238	10.828	10.829	10	4	73.8	15.6	1.2	100	1549	1780	2403	18454	20068	30470	10.821	479.3	479.3	1.9	0.001	0	0.06	0.5	21000	1	2	1	1819				1
479.302	217	11.355	11.312	10	4	87.4	4.3	20.5	94.4	1341	1628	2534	15691	22292	38280	11.311	479.301	479.302	1.34	-0.043	0	0.038	0.666	23371	2	2		1786				1
480.105	125	9.805	9.819	10	4	77.6	7.9	26.7	87.8	1718	2267	2991	75007	92510	124202	9.833	480.105	480.105	0.71	0.013	0	0.403	1.566	94728	2	2		2280				1
480.241	349	8.962	8.948	4	10	69.2	91.8	2.8	98.4	1268	1772	2557	10260	28733	38626	8.951	480.239	480.241	12.46	-0.015	0	0.027	0.833	26588	1	2	1	1842				1
481.318	47	11.411	11.389	10	4	97.2	5.3	0.9	100	5624	6931	10550	85647	122459	187603	11.39	481.318	481.318	1.09	-0.023	0	0.067	0.58	123953	3	3		7265				1
481.318	50	12.027	11.998	10	4	98.6	1.4	5.5	100	5881	7457	10334	85558	119711	204508	11.997	481.318	481.318	0.57	-0.029	0	0.051	1.116	134851	3	3		7752				1
482.249	187	8.741	8.756	4	10	83.2	109.5	68.8	87.2	3011	3719	4372	19162	36967	42964	8.759	482.255	482.25	10.3	0.015	0	0.023	0.466	34015	1	2	2	3705				1
484.123	359	7.724	7.722	1	13	59.1		48.9	98.2	1670	1670	1670	17714	17714	17714	7.722	484.123	484.123		-0.002	0	0	0.366	17714	2	2		1670				1
486.18	164	8.312	8.307	4	10	70.8	83.1	64.3	100	3488	3860	5230	29694	31302	51666	8.305	486.174	486.18	10.11	-0.005	0	0.027	0.35	35991	2	2		4110				1
493.121	315	6.199	6.209	1	13	64.5		36	93	1764	1764	1764	23426	23426	23426	6.209	493.122	493.121		0.01	0	0	0.533	23426	2	2		1764				1
498.15	379	7.594	7.591	1	13	68.2		52.9	99.5	2380	2380	2380	13403	13403	13403	7.591	498.151	498.15		-0.003	0	0	0.233	13403	2	2		2380				1
498.282	432	9.353	9.333	1	13	73.9		117.5	94	1199	1199	1199	8222	8222	8222	9.333	498.282	498.282		-0.02	0	0	0.183	8222	2	2		1199				1
499.271	140	10.514	10.498	10	4	87.6	5.8	1	100	2812	3132	5331	28482	31674	50650	10.499	499.271	499.271	0.88	-0.016	0	0.036	0.466	34333	2	2		3417				1
501.287	60	10.888	10.888	10	4	99.8	1.3	0	100	10313	12419	17823	100786	118116	149103	10.886	501.286	501.287	0.55	0	0	0.035	0.533	119859	3	3		12918				1
502.182	180	9.481	9.466	10	4	87	4.2	0.2	100	2306	3336	4682	18782	24561	37108	9.467	502.182	502.181	1.53	-0.015	0	0.028	0.283	25335	2	2		3309				1
503.284	360	10.508	10.499	1	13	76.1		45.9	87.4	1982	1982	1982	18630	18630	18630	10.499	503.282	503.284		-0.009	0	0	0.366	18630	2	2		1982				1
504.155	390	8.313	8.3	2	12	58.5	130.9	3.2	95.4	1382	1477	1572	7406	9620	11834	8.3	504.159	504.155	12.17	-0.014	0	0.015	0.3	9620	1	2	1	1477				1
505.318	79	11.104	11.071	10	4	97.9	16.9	0	100	5209	5922	8051	88555	99185	126262	11.072	505.317	505.318	0.8	-0.033	0	0.057	0.783	102422	1	3	1	6289				1
506.189	407	6.766	6.772	3	11	82.8	10.6	24.3	74.9	1158	1599	1694	5407	7914	8564	6.772	506.188	506.189	1.91	0.006	0	0.006	0.167	7295	2	2		1483				1
506.24	254	7.692	7.685	3	11	74	24	31.4	100	1862	1901	3620	4245	12440	25100	7.682	506.242	506.24	8.41	-0.008	0	0.014	0.283	13928	2	2		2461				1
507.334	101	11.728	11.69	10	4	50.7	2.4	8.8	100	3374	4536	5942	68007	87105	100699	11.689	507.334	507.334	1.47	-0.038	0	0.085	0.933	85927	1	2	8	4677				1
509.347	78	12.473	12.435	10	4	88.6	44.3	16.7	100	3770	4788	6291	35560	106304	155542	12.435	509.349	509.349	7.53	-0.037	0	0.08	1.317	106471	1	3	2	4976				1
510.094	403	6.46	6.459	1	13	66.6		40.3	100	1500	1500	1500	10109	10109	10109	6.459	510.094	510.094		-0.001	0	0	0.233	10109	2	2		1500				1
510.285	353	9.512	9.518	2	12	66.7	55.3	87.5	100	1488	1525	1561	11381	11439	11498	9.518	510.287	510.285	8.17	0.006	0	0.03	0.316	11439	2	2		1525				1
512.296	205	9.145	9.141	14	0	70.9	33.1	20.2	100	1196	1791	4481	11236	15994	41879	9.139	512.299	512.295	6.49	-0.005	0	0.065	0.383	19555	1	2	1	2212				1
513.307	22	10.521	10.504	10	4	99.5	0.8	0	100	15506	22773	36334	171430	230789	346510	10.504	513.308	513.307	0.5	-0.017	0	0.026	0.75	239955	3	3		23753				1
515.195	429	7.841	7.851	3	11	85.1	40.2	28	87.5	1029	1509	1525	6147	7937	8395	7.843	515.197	515.196	6.9	0.011	0	0.031	0.216	7493	2	2		1354				1
520.145	329	7.155	7.139	3	11	82	23.3	26.8	100	2222	2802	3223	16160	17976	23757	7.144	520.142	520.145	1.29	-0.016	0	0.023	0.266	19298	2	2		2749				1
524.216	428	7.175	7.179	2	12	52.6	4.2	30.5	88	1658	1715	1773	8227	8247	8266	7.179	524.218	524.216	1.97	0.003	0	0.013	0.167	8247	2	2		1715				1
525.286	69	10.9	10.894	10	4	88	0.5	0.6	100	8800	10623	13102	81680	95392	110736	10.896	525.286	525.286	0.37	-0.007	0	0.036	0.533	93970	2	2		10630				1
525.344	115	11.773	11.727	10	4	87	2.5	5.7	100	2392	2855	4227	35353	45637	70185	11.732	525.344	525.344	0.66	-0.047	0	0.057	0.75	47194	2	2		3030				1
526.131	318	7.782	7.757	3	11	57.2	62.7	12.4	75.8	1217	1442	1575	12077	19461	23385	7.777	526.135	526.131	2.66	-0.025	0	0.063	0.466	18308	1	2	2	1411				1
526.273	268	8.588	8.591	9	5	79.5	66.2	45.3	100	1053	1911	2948	6463	12182	41212	8.598	526.277	526.272	7.95	0.003	0	0.081	0.699	17155	1	2	3	1864				1
526.279	320	8.642	8.621	7	7	78.1	169		98.4	1045	1537	2403	7364	8441	33158	8.605	526.288	526.278	8.85	-0.021	0	0.064	0.699	13965	1	2	5	1596				1
527.317	71	10.914	10.909	10	4	82.3	12.5	10	100	7339	8180	10763	64657	88813	118974	10.909	527.321	527.318	2.18	-0.005	0	0.043	0.633	89760	2	2		8265				1
527.357	165	11.75	11.726	10	4	84.7	3.7	10.4	100	1280	1973	2482	21710	35563	43829	11.732	527.358	527.357	1.1	-0.024	0	0.066	0.716	33841	2	2		1953				1
529.315	235	11.113	11.108	10	4	83.9	11.2	46.4	100	1592	1807	2776	28057	32568	43112	11.096	529.317	529.315	2.23	-0.006	0	0.165	0.566	33085	2	2		1902				1
530.528	267	7.723	7.746	2	12	70.8	85.3	84.1	72.2	1506	1713	1920	1739	2561	3383	7.746	530.524	530.528	11.17	0.023	0	0.044	0.05	2561	2	3		1713				1
531.316	162	11.454	11.454	10	4	86.8	13.1	42.1	100	1242	1456	1941	24318	27351	48360	11.469	531.316	531.316	3.6	0.001	0	0.154	1.033	32318	2	2		1538				1
534.173	305	8.137	8.129	10	4	86.2	17	21.3	100	1039	2016	3221	4279	11287	19187	8.129	534.172	534.173	1.95	-0.008	0	0.016	0.217	11225	2	2		2031				1
534.19	412	7.678	7.672	3	11	55.4	15	24.1	79.2	1425	1434	1506	4373	4515	11368	7.671	534.194	534.189	4.76	-0.006	0	0.027	0.266	6752	2	2		1455				1
539.14	348	7.16	7.139	3	11	86.6	8.6	31.9	95.1	2539	2953	3283	15642	15793	19909	7.144	539.14	539.139	4.13	-0.021	0	0.023	0.283	17115	2	2		2925				1
539.323	26	10.817	10.793	10	4	98.9	1.4	0	100	23455	25254	32782	282422	302036	379937	10.792	539.323	539.323	0.58	-0.024	0	0.039	0.65	310199	3	4		26221				1
540.258	64	8.607	8.501	10	4	85.6	143.3	0	100	1112	2267	5822	8293	19180	52740	8.519	540.268	540.257	7.77	-0.106	0	0.22	0.383	23838	1	2	5	3254				1
540.259	331	9.435	9.429	5	9	86.9	11.7	76.6	100	1767	2194	3004	15962	21272	23306	9.431	540.259	540.259	0.7	-0.006	0	0.035	0.417	20595	2	2		2290				1
540.261	96	8.497	8.485	12	2	86.1	39.2	19.2	100	1324	2560	12283	9424	20765	99280	8.498	540.258	540.26	7.98	-0.013	0	0.072	0.883	32600	1	2	1	4209				1
541.339	2	11.419	11.382	10	4	99.8	0.1	0	100	77206	85048	132013	1606219	1860308	2869252	11.38	541.339	541.339	0.22	-0.037	0	0.055	1.321	2003137	4	4		92583				1
542.276	68	8.382	8.361	11	3	87.7	41.3	23.2	100	1173	1741	8884	13273	23428	155003	8.369	542.273	542.275	8.37	-0.021	0	0.073	1.132	58143	1	2	1	3552				1
548.206	416	8.084	8.071	3	11	76.7	58.9	115.5	81.4	1039	1395	2103	6241	9783	12430	8.071	548.203	548.207	6.01	-0.013	0	0.006	0.3	9485	2	2		1512				1
550.212	74	7.724	7.707	4	10	91.3	45.8	17.7	100	7085	10774	12882	40083	87618	124749	7.71	550.211	550.213	11.82	-0.017	0	0.023	0.366	85017	2	3		10379				1
551.359	301	12.042	12.006	7	7	85.6	17	44.7	97.9	1052	1339	2248	9238	14444	23359	12.019	551.36	551.359	1.97	-0.036	0	0.075	0.366	15493	2	2		1500				1
553.325	288	11.187	11.187	10	4	84.9	10.7	62.2	100	1203	1532	2250	18919	21229	30083	11.192	553.323	553.326	1.54	0	0	0.164	0.483	22849	2	2		1595				1
553.375	100	12.037	12.004	10	4	87.8	2.3	0.1	100	2778	3807	5873	36056	51514	77107	12.01	553.375	553.374	1.06	-0.033	0	0.067	0.55	51865	2	2		3928				1
555.312	209	11.053	11.043	8	6	82.9	4.6	35.3	100	1055	1261	2189	17445	21046	36307	11.022	555.31	555.312	0.65	-0.01	0	0.138	0.5	23317	2	2		1397				1
555.355	48	11.906	11.881	10	4	96.5	11.3	2.6	100	6208	7781	9962	107341	136339	184182	11.88	555.355	555.355	0.72	-0.026	0	0.043	0.983	138376	3	3		7728				1
557.332	199	11.773	11.744	7	7	83.1	18.4	53.2	94	1010	1057	1554	13071	24112	37398	11.744	557.33	557.331	2.52	-0.029	0	0.149	0.783	24781	2	2		1189				1
557.334	330	9.31	9.298	10	4	87.4	3	0	100	1432	1791	2199	10570	14987	17414	9.3	557.333	557.334	1.69	-0.012	0	0.049	0.3	14572	2	2		1784				1
559.34	218	12.47	12.44	10	4	82	17	28.2	91	1199	1319	2003	22021	29082	49874	12.438	559.34	559.34	1.1	-0.03	0	0.11	0.967	32864	2	2		1470				1
560.255	378	7.792	7.778	2	12	85.5	3.1	73.8	100	1567	1673	1779	10164	11007	11851	7.778	560.255	560.255	1.48	-0.014	0	0.013	0.233	11007	2	2		1673				1
562.177	404	8.804	8.787	1	13	63.1			71.4	1345	1345	1345	8883	8883	8883	8.787	562.18	562.177		-0.017	0	0	0.233	8883	2	2		1345				1
563.323	43	10.693	10.657	10	4	73.1	2.3	0.3	100	8959	11076	17611	113137	143803	210989	10.656	563.323	563.323	0.46	-0.036	0	0.043	0.6	148601	2	2		11703				1
565.339	6	11.094	11.061	10	4	99.9	0.1	11	100	86873	98792	137920	1285018	1656483	2227912	11.062	565.339	565.339	0.22	-0.032	0	0.047	1.416	1697191	4	4		104211				1
566.21	401	7.712	7.688	3	11	70	30.5	17	92.9	1284	1646	1671	7674	8537	16163	7.688	566.209	566.211	4.23	-0.024	0	0.006	0.316	10792	1	2	2	1534				1
567.235	355	7.93	7.925	4	10	77.7	179			883	2830	3398	2393	14065	18317	7.926	567.231	567.235	12.3	-0.005	0	0.013	0.183	12210	0	2		2485				1
567.238	387	7.927	7.929	4	10	79	255.1			577	2144	2547	2013	9228	11418	7.926	567.246	567.238	13.26	0.002	0	0.029	0.117	7972	0	2	2	1853				1
567.355	8	11.731	11.687	10	4	99.6	1.9	0	100	67355	73964	94289	1328855	1487974	1776637	11.684	567.355	567.355	0.41	-0.044	0	0.034	1.516	1506214	3	4		76843				1
568.324	402	9.597	9.58	2	12	66.4	18.8	77.2	97.4	1002	1160	1317	10823	12968	15114	9.58	568.324	568.324	1.21	-0.018	0	0.027	0.366	12968	2	2		1160				1
568.325	393	9.113	9.07	3	11	73.1	20	28.3	90.6	1013	1113	1576	9988	10295	15136	9.077	568.325	568.325	1.96	-0.043	0	0.039	0.383	11806	2	2		1234				1
569.371	5	12.463	12.419	10	4	99.9	0.2	0	100	67596	81876	109235	1450345	1885905	2616139	12.422	569.371	569.371	0.4	-0.043	0	0.066	1.561	1904522	3	4		82799				1
570.167	343	8.152	8.13	10	4	86.8	7.5	18.7	100	1112	1467	1999	7697	12512	16957	8.134	570.167	570.167	1.58	-0.022	0	0.048	0.25	12391	2	2		1528				1
577.293	216	10.709	10.695	9	5	86.9	8.7	13.7	100	1019	1165	2511	9014	11478	31352	10.701	577.293	577.293	1.27	-0.014	0	0.084	0.416	13861	2	2		1379				1
578.105	421	6.852	6.839	1	13	68.4		89.7	94.2	1325	1325	1325	7751	7751	7751	6.839	578.107	578.105		-0.013	0	0	0.167	7751	2	2		1325				1
579.294	392	10.71	10.699	1	13	62.8		122.2	100	1248	1248	1248	14693	14693	14693	10.699	579.294	579.294		-0.011	0	0	0.35	14693	2	2		1248				1
581.297	414	10.512	10.502	4	10	83.4	11.7	9.9	98.1	1069	1249	1437	8708	9601	10921	10.499	581.295	581.297	2.02	-0.01	0	0.029	0.333	9708	2	2		1251				1
581.332	167	9.704	9.702	5	9	85.6	10.1	43	100	1990	3166	4902	24489	37870	58333	9.701	581.334	581.332	1.53	-0.002	0	0.029	0.483	41901	2	2		3524				1
584.258	340	9.389	9.376	9	5	77.6	40.5	46.9	100	1220	1619	2417	2854	12012	20390	9.374	584.263	584.258	3.48	-0.013	0	0.041	0.25	11445	1	2	1	1704				1
587.322	10	10.761	10.703	10	4	83.8	7.3	0	100	47367	67927	113981	488602	724019	1266553	10.703	587.323	587.322	0.46	-0.059	0	0.032	0.716	782118	2	3		72501				1
589.339	18	11.138	11.143	10	4	96.2	1.7	8.3	100	21705	24130	32671	303099	428181	557873	11.124	589.339	589.339	0.48	0.005	0	0.158	1.449	428501	3	4		25906				1
591.354	51	11.514	11.479	10	4	98.3	12.1	0.2	100	8682	11257	15998	163946	203296	237629	11.479	591.355	591.354	1.19	-0.036	0	0.06	1.466	201334	2	3		11463				1
593.368	142	12.03	12.003	10	4	87.7	6.1	2.8	100	2163	2810	3895	32192	38776	52728	12.005	593.369	593.368	1.34	-0.027	0	0.069	0.616	40005	2	2		2885				1
595.385	249	12.725	12.717	10	4	84.6	9.8	4.4	95	2185	2626	3537	27720	35971	50798	12.717	595.386	595.385	1.44	-0.008	0	0.074	0.7	37109	2	2		2674				1
596.297	206	10.828	10.84	5	9	82.3	9.1	51.3	72.9	1335	1684	2212	34208	60737	85680	10.835	596.297	596.298	0.79	0.012	0	0.182	1.482	61196	2	2		1703				1
603.317	362	9.647	9.718	3	11	66.6	8.8	68.1	95.7	1119	1587	1758	15820	26200	27271	9.697	603.316	603.317	0.37	0.072	0	0.122	0.55	23097	2	2		1488				1
605.33	346	9.729	9.851	10	4	86.4	79.9			331	940	2482	1396	3235	22950	9.818	605.331	605.33	3.75	0.122	0	0.222	0.35	7943	0	2	4	1228				1
605.33	152	9.961	9.921	10	4	87.7	86			331	1180	4006	1475	16934	73880	9.936	605.333	605.332	4.92	-0.04	0	0.192	0.683	26540	0	2	4	1696				1
606.218	342	7.711	7.691	3	11	84.9	39.2	7.7	100	2401	2815	2889	18819	19605	19805	7.694	606.218	606.219	9.46	-0.02	0	0.013	0.25	19410	2	2		2702				1
607.198	364	7.101	7.091	3	11	87.8	16.1	2.2	90.7	2489	3085	3194	6133	12817	16027	7.094	607.197	607.197	3.8	-0.01	0	0.013	0.2	11659	2	2		2923				1
607.309	380	10.81	10.811	5	9	66.7	10.5	33	100	1048	1192	1569	6564	10062	15253	10.808	607.309	607.309	1.12	0.002	0	0.052	0.316	10697	2	2		1248				1
607.347	376	10.018	10.032	4	10	84.9	12.1	59.4	97.7	1167	1605	1723	16073	21141	26195	10.046	607.346	607.346	0.57	0.013	0	0.072	0.433	21138	2	2		1525				1
609.326	111	11.44	11.405	8	6	87.9	11.4	16.4	100	1015	1880	3289	19373	45581	89087	11.428	609.326	609.326	0.48	-0.036	0	0.186	1.233	49747	2	3		1996				1
613.339	24	11.145	11.142	10	4	93.6	3.4	18.8	100	16418	20542	28975	264668	313873	391034	11.142	613.338	613.339	0.42	-0.003	0	0.024	1.166	321728	3	3		21182				1
614.371	409	8.984	8.99	3	11	83.4	93.2	115.7	96.2	1058	1150	1759	5215	8148	9147	8.998	614.366	614.373	6.81	0.006	0	0.037	0.233	7503	1	2	1	1322				1
615.217	391	8.22	8.207	3	11	83.1	53.7	8.3	100	1550	1732	1864	8267	12188	12944	8.215	615.22	615.22	8.83	-0.013	0	0.03	0.233	11133	2	2		1715				1
615.352	92	11.365	11.326	10	4	86.9	5.4	12.3	100	3233	4061	4845	68906	93313	105456	11.324	615.353	615.352	1.14	-0.039	0	0.028	1.233	90247	3	3		3985				1
617.368	374	11.872	11.875	10	4	79.4	12.8	28.2	100	1235	1373	1644	9663	15926	18136	11.87	617.369	617.369	2.46	0.002	0	0.048	0.417	14937	2	2		1407				1
618.204	388	7.7	7.69	2	12	61.9	68.1	18.3	78.3	1221	1432	1642	8552	10752	12952	7.69	618.206	618.204	14.09	-0.01	0	0.004	0.266	10752	2	2		1432				1
625.344	384	9.302	9.317	5	9	82.9	25.2	86.3	78.2	1006	1106	1275	12327	16577	19818	9.319	625.345	625.344	2.61	0.014	0	0.031	0.483	16436	2	2		1146				1
628.382	383	9.147	9.14	2	12	63.5	16.8	70.8	96.9	1013	1225	1436	8709	11872	15035	9.14	628.383	628.382	0.12	-0.006	0	0.048	0.366	11872	2	2		1225				1
629.333	80	9.908	9.962	5	9	87.3	2.9	54	98.7	1994	3328	4657	47943	75344	115682	9.95	629.333	629.333	0.64	0.054	0	0.111	0.834	84020	2	2		3403				1
631.347	257	10.027	10.08	4	10	84	22.6	31.2	99.2	1134	1406	1826	17626	25882	33932	10.067	631.347	631.347	1.06	0.053	0	0.115	0.6	25830	1	2	1	1443				1
632.251	368	9.866	9.866	9	5	84.1	26.6	44.7	100	1050	1210	2497	6325	8945	17988	9.871	632.25	632.251	4.2	0	0	0.046	0.3	9634	1	2	1	1346				1
633.325	138	11.031	10.97	10	4	89.5	13.5	40.9	100	1249	2105	3729	18325	35037	63121	10.994	633.326	633.325	0.96	-0.061	0	0.129	0.483	35009	2	3		2182				1
635.342	119	11.755	11.799	10	4	79.8	13.5	21.1	100	1131	1888	3322	21331	40321	78967	11.77	635.342	635.342	0.78	0.044	0	0.131	0.817	41908	2	3		1915				1
636.241	369	7.802	7.754	2	12	73	141.4	27.3	99.8	1104	1300	1495	2863	8197	13531	7.754	636.25	636.241	14.65	-0.048	0	0.106	0.266	8197	1	2	1	1300				1
637.326	361	9.799	9.768	9	5	83.6	10.2	37.8	98.5	1083	1266	1764	10765	13628	20076	9.771	637.327	637.326	1.69	-0.031	0	0.043	0.383	14072	2	2		1331				1
637.358	81	12.491	12.433	10	4	91.1	13.1	13.2	100	1580	2594	4991	38587	69509	172589	12.445	637.358	637.358	1.06	-0.059	0	0.138	1.517	79576	2	3		2706				1
639.284	283	11.779	11.746	3	11	72.2	26.4	61.8	88.6	1095	1456	1621	13261	25131	31875	11.752	639.285	639.285	1.34	-0.033	0	0.088	0.667	23422	1	2	1	1391				1
640.245	425	8.425	8.407	1	13	56.8		141.4	94	1325	1325	1325	17184	17184	17184	8.407	640.247	640.245		-0.018	0	0	0.466	17184	2	2		1325				1
640.256	433	9.469	9.483	1	13	60.3		115.8	91.1	1246	1246	1246	8825	8825	8825	9.483	640.257	640.256		0.014	0	0	0.233	8825	2	2		1246				1
640.26	263	7.693	7.68	4	10	69.7	86.3	8.1	85.3	1150	2587	5219	3667	13505	29585	7.681	640.255	640.262	10.18	-0.013	0	0.014	0.266	15066	1	3	1	2886				1
641.301	184	12.483	12.46	10	4	71.9	10.7	25.5	87.8	1010	1325	2207	27071	29644	75678	12.48	641.3	641.301	1.39	-0.023	0	0.21	1.217	37493	2	2		1445				1
641.346	417	8.252	8.221	1	13	70.2		173.2	90.1	1657	1657	1657	11774	11774	11774	8.221	641.348	641.346		-0.031	0	0	0.25	11774	2	2		1657				1
648.167	373	8.719	8.679	2	12	68.3	47.4	39.6	81.8	1305	1377	1449	13955	16047	18139	8.679	648.164	648.167	5.9	-0.041	0	0.023	0.433	16047	2	2		1377				1
648.226	365	7.758	7.755	3	11	81.1	11.6	86.6	100	1344	1427	2417	8392	11648	17653	7.755	648.226	648.225	4.39	-0.003	0	0.006	0.266	12564	2	2		1729				1
648.386	396	9.623	9.624	3	11	84.5	8.4	40.2	75.2	2058	2397	2491	10792	12409	12557	9.622	648.386	648.386	1.14	0.001	0	0.01	0.25	11920	2	2		2315				1
654.282	289	9.491	9.483	3	11	78.4	96.3	22.1	90.1	2320	2392	2835	25351	31833	38074	9.481	654.275	654.282	11.45	-0.008	0	0.014	0.633	31753	1	2	1	2516				1
655.312	231	10.703	10.691	10	4	87.3	11.5	17.2	100	1355	2287	3347	21447	30439	37385	10.691	655.31	655.312	1.3	-0.012	0	0.046	0.566	30124	2	2		2197				1
660.141	427	7.811	7.804	2	12	55.9	87.5	62	90.1	1044	1272	1499	4173	6703	9233	7.804	660.137	660.141	7.02	-0.007	0	0.027	0.2	6703	2	2		1272				1
664.301	363	7.694	7.674	3	11	83	52.4	16.6	99.6	2505	2572	3040	16678	20364	21916	7.677	664.295	664.301	5.45	-0.02	0	0.02	0.35	19653	2	2		2706				1
666.302	276	7.708	7.673	4	10	84.9	70.5	17.1	87	1079	2892	3170	3406	22579	28540	7.677	666.306	666.303	11.13	-0.035	0	0.024	0.366	19276	1	2	1	2508				1
679.27	226	9.482	9.471	14	0	85.7	210.3			274	571	3053	695	5648	35201	9.488	679.265	679.269	12.74	-0.011	0	0.155	0.467	10709	0	2	1	1065				1
679.27	281	9.487	9.475	14	0	85.8	263.8			274	571	3053	916	4932	30732	9.489	679.281	679.269	12.61	-0.012	0	0.155	0.367	9217	0	2	2	1054				1
680.289	426	7.791	7.791	1	13	64			95.6	1561	1561	1561	9409	9409	9409	7.791	680.29	680.289		0	0	0	0.233	9409	2	2		1561				1
702.203	399	8.205	8.205	3	11	87.5	62.9	11.3	74.2	1874	2332	2414	8016	9095	12100	8.204	702.206	702.206	11.68	-0.001	0	0.006	0.167	9737	2	2		2207				1
703.292	386	7.838	7.819	2	12	73.6	0	104	100	1139	1471	1803	8786	11469	14151	7.819	703.292	703.292	0.25	-0.019	0	0.003	0.266	11469	2	2		1471				1
707.347	406	11	10.961	4	10	76.1	13.6	103.6	90.5	1053	1103	1192	10732	13264	14069	10.96	707.347	707.347	0.32	-0.039	0	0.015	0.4	12832	2	2		1113				1
714.267	375	8.72	8.729	2	12	74.1	12.3	10.3	89.7	1516	1658	1800	21854	23729	25603	8.729	714.269	714.267	4.19	0.008	0	0.011	0.566	23729	2	2		1658				1
729.331	382	10.7	10.679	10	4	87	12.7	52	100	1089	1214	1501	5761	11760	16747	10.684	729.331	729.331	1.47	-0.021	0	0.065	0.35	11759	2	2		1261				1
734.555	335	10.963	11.142	2	12	78.7	2.6	125.9	84	1078	1303	1527	7529	20899	34270	11.142	734.555	734.555	0.42	0.178	0	0.232	0.767	20899	2	2		1303				1
746.555	191	9.323	9.378	4	10	88	23.2	41.2	79.3	1172	1692	2234	7366	19999	40827	9.377	746.556	746.556	1.08	0.055	0	0.032	0.567	22048	2	3		1698				1
748.574	132	12.048	12.134	3	11	92.8	21.5	56.5	91.1	1164	1425	1524	16688	24299	37131	12.119	748.572	748.574	2.42	0.086	0	0.074	0.65	26040	3	3		1371				1
759.389	310	10.512	10.5	10	4	84.7	7.1	7.9	100	1685	1912	2612	14970	16797	23295	10.504	759.39	759.389	1.4	-0.012	0	0.049	0.367	17505	2	2		2051				1
775.428	408	9.59	9.59	4	10	75.1	13.2	37.5	99.8	1006	1552	1984	5242	10410	12863	9.588	775.427	775.428	1.04	0	0	0.022	0.283	9731	2	2		1523				1
785.408	389	10.817	10.816	5	9	70.2	10.3	25.5	100	1052	1167	1960	7729	8591	15244	10.819	785.407	785.407	0.93	-0.001	0	0.068	0.366	10924	2	2		1316				1
797.408	419	9.513	9.511	2	12	74.9	10.8	49.2	93.9	1374	1375	1375	11305	11641	11977	9.511	797.409	797.408	0.73	-0.001	0	0.006	0.266	11641	2	2		1375				1
811.423	271	10.975	10.955	10	4	86.3	10.2	37.4	100	1146	1549	2611	6595	11712	35457	10.959	811.423	811.422	0.84	-0.02	0	0.081	0.466	14614	2	2		1669				1
814.319	435	7.71	7.695	2	12	55.6	10.9	81.1	99.4	1183	1187	1191	6051	6504	6958	7.695	814.32	814.319	2.79	-0.015	0	0.013	0.2	6504	1	2	1	1187				1
829.584	63	12.089	12.118	7	7	89	34	42.7	74.2	1946	2727	3864	27592	45602	190109	12.111	829.582	829.584	0.84	0.028	0	0.165	2.063	70822	1	3	3	2839				1
830.319	372	7.551	7.536	10	4	84.7	7.7	17.4	100	1317	2291	2684	8341	13704	15589	7.539	830.318	830.319	2.06	-0.015	0	0.039	0.233	12922	2	2		2137				1
830.595	173	10.34	10.343	3	11	58.1	87.4	183.5	75.8	1776	2505	4909	4937	150572	281960	10.353	830.585	830.592	13.31	0.003	0	0.4	1.59	145823	1	2	1	3064				1
833.407	237	10.702	10.683	10	4	88.5	19.1	5.9	100	2081	2435	3250	25246	28006	38904	10.688	833.407	833.407	1.51	-0.019	0	0.043	0.533	29706	2	3		2584				1
836.296	410	7.726	7.722	3	11	78.4	94.4	124.8	100	1001	1129	1262	3386	8206	11757	7.722	836.297	836.298	9.44	-0.004	0	0.026	0.25	7783	1	2	1	1131				1
859.593	424	10.502	10.49	3	11	61.1	9.9	97.6	89.1	1141	1298	1553	5719	7256	8827	10.483	859.594	859.593	4.49	-0.011	0	0.027	0.217	7267	2	2		1331				1
864.337	341	10.969	11.022	2	12	78.2	29.7	123.6	73.2	1155	1438	1721	14579	18914	23250	11.022	864.335	864.337	2.86	0.053	0	0.088	0.416	18914	2	2		1438				1
868.362	356	12.609	12.48	2	12	80.1	19.3	200	84.8	1255	1291	1327	23579	34316	45053	12.48	868.363	868.362	0.29	-0.129	0	0.104	0.917	34316	2	2		1291				1
874.366	306	6.765	6.748	4	10	92.1	66.9	0	100	1064	2951	3776	4938	19282	24174	6.752	874.372	874.371	11.42	-0.017	0	0.031	0.233	16919	1	3	1	2686				1
886.318	357	10.707	10.678	3	11	82.6	3.7	100.3	99.8	1073	1080	1894	8426	9578	18743	10.696	886.317	886.318	0.51	-0.028	0	0.057	0.316	12249	2	2		1349				1
1097.56	224	7.433	7.425	5	9	98.2	8	19.7	100	1882	2993	4857	11319	18241	33298	7.428	1097.56	1097.56	1.29	-0.009	0	0.031	0.233	21270	3	3		3298				1
1395.56	395	8.181	8.167	1	13	61.5			79.1	1424	1424	1424	10988	10988	10988	8.167	1395.56	1395.56		-0.014	0	0	0.2	10988	3	3		1424				1
1464.64	149	7.565	7.569	2	12	99.1	20.4	49.6	100	1100	4165	7231	6285	27186	48087	7.569	1464.64	1464.64	0.03	0.004	0	0.036	0.233	27186	3	4		4165				1
1615.65	277	7.627	7.617	1	13	98.5		141.4	98.7	3673	3673	3673	25205	25205	25205	7.617	1615.65	1615.65		-0.009	0	0	0.233	25205	3	3		3673				1

## Sheet: CPM PB & BW HIPPURIC ACID
Area	File	Flags (Tgt)	Score (Tgt)	Score (MFE)	Height	Base Peak	Hits	Polarity	Mass	Time Segment	m/z	Diff (Tgt, ppm)	RT	Start	End	Width	Ions	Z Count	Min Z	Max Z
2509937	CPM0u_BW_rpt.d		87.37	100	239738	263.108	1	Negative	179.06	1	178.054	1.51	7.751	7.602	8.467	0.152	4	1	1	1
2244348	CPM0u_PB_rpt.d		87.33	78.6	209819	263.107	1	Negative	179.059	1	178.054	-1.24	7.755	7.625	8.454	0.16	4	1	1	1
2122351	CPM4u_BW_rpt.d	m/z tolerance	72.42	100	189535	263.11	1	Negative	179.061	1	178.056	10.4	7.757	7.591	8.557	0.167	4	1	1	1
1276794	CPM4u_PB_rpt.d	m/z tolerance	55.81	100	135547	263.103	1	Negative	179.056	1	178.051	-17.66	7.759	7.626	8.475	0.15	3	1	1	1
82428	B3.rpt.d	m/z tolerance	67.96	100	10767	291.085	1	Negative	179.057	1	178.052	-10.48	7.667	7.601	7.934	0.121	2	1	1	1
67465	B2.rpt.d		75.09	100	8887	291.085	1	Negative	179.058	1	178.052	-8.99	7.678	7.595	7.911	0.124	2	1	1	1
67359	B4.rpt.d	low score	74.41	100	8906	291.085	1	Negative	179.058	1	178.052	-7.71	7.671	7.587	7.97	0.117	2	1	1	1
52451	B1.rpt.d	low score	72.78	100	7073	291.085	1	Negative	179.058	1	178.052	-9.36	7.692	7.609	8.009	0.111	2	1	1	1
49522	B5.rpt.d	m/z tolerance	69.22	100	6633	291.085	1	Negative	179.057	1	178.052	-11.32	7.677	7.61	7.943	0.124	2	1	1	1
38729	4.rpt.d	m/z tolerance	61.12	100	5258	291.084	1	Negative	179.057	1	178.051	-13.58	7.682	7.599	7.932	0.126	2	1	1	1
35054	3.rpt.d	m/z tolerance	69.88	100	4832	291.085	1	Negative	179.057	1	178.052	-11.3	7.703	7.603	7.903	0.119	2	1	1	1
27250	5.rpt.d		77.69	100	3764	291.085	1	Negative	179.058	1	178.053	-7.16	7.675	7.608	7.858	0.121	2	1	1	1
24383	1.rpt.d	m/z tolerance	62.09	96.2	3731	291.085	1	Negative	179.057	1	178.052	-11.77	7.68	7.614	7.83	0.114	2	1	1	1
20335	2.rpt.d	m/z tolerance	63.05	98.2	2879	291.084	1	Negative	179.057	1	178.052	-11.84	7.684	7.618	7.901	0.104	2	1	1	1

## Sheet: CPM PB & BW Caffeic
Area	File	Flags (Tgt)	Score (Tgt)	Score (MFE)	Height	Base Peak	Hits	Polarity	Mass	Time Segment	m/z	Diff (Tgt, ppm)	RT	Start	End	Width	Ions	Z Count	Min Z	Max Z
16222037	22 Mixed Stds.d	m/z tolerance	14.98		1853280	179.036	1	Negative	180.034	1	179.036	-17.92	7.713	7.613	8.13	0.135	2	1	1	1
41157	CPM4u_PB_rpt.d	low score	72.85	92.7	3371	263.105	1	Negative	180.039	1	361.075	9.84	7.692	7.409	7.959	0.208	3	1	1	1
31924	CPM0u_PB_rpt.d	low score	46.5		3123	263.108	1	Negative	180.038	1	179.04	2.57	7.572	7.372	7.672	0.218	1	1	1	1
26554	CPM4u_BW_rpt.d	low score	41.09		2418	263.11	1	Negative	180.039	1	179.04	6.4	7.591	7.365	7.69	0.233	1	1	1	1
25038	CPM0u_BW_rpt.d	low score	44.31		3472	263.11	1	Negative	180.038	1	179.04	4.47	7.635	7.385	7.685	0.072	1	1	1	1
	B3.rpt.d	no EIC peaks					1	Negative
	B4.rpt.d	no EIC peaks					1	Negative
	B5.rpt.d	no EIC peaks					1	Negative
	3.rpt.d	no EIC peaks					1	Negative
	1.rpt.d	no EIC peaks					1	Negative
	B1.rpt.d	no EIC peaks					1	Negative
	4.rpt.d	no EIC peaks					1	Negative
	5.rpt.d	no EIC peaks					1	Negative
	B2.rpt.d	no EIC peaks					1	Negative
	2.rpt.d	no EIC peaks					1	Negative

## Sheet: CPM PB & BW PCA
Area	File	Flags (Tgt)	Score (Tgt)	Score (MFE)	Height	Base Peak	Hits	Polarity	Mass	Time Segment	m/z	Diff (Tgt, ppm)	RT	Start	End	Width	Ions	Z Count	Min Z	Max Z
87186	CPM4u_BW_rpt.d		87.99	100	10269	194.051	1	Negative	154.03	1	153.024	-0.29	6.575	6.475	6.892	0.128	2	1	1	1
75553	CPM0u_BW_rpt.d		87.85	100	9291	204.987	1	Negative	154.031	1	153.024	1.05	6.586	6.488	6.885	0.116	2	1	1	1
45288	CPM0u_PB_rpt.d		87.19	100	5383	219.003	1	Negative	154.03	1	153.024	0.83	6.589	6.439	6.772	0.118	2	1	1	1
26079	CPM4u_PB_rpt.d	m/z tolerance	55.78	96.4	3574	218.999	1	Negative	154.028	1	153.021	-18.84	6.593	6.477	6.727	0.11	2	1	1	1
	B3.rpt.d	no EIC peaks					1	Negative
	B4.rpt.d	no EIC peaks					1	Negative
	1.rpt.d	no EIC peaks					1	Negative
	4.rpt.d	no EIC peaks					1	Negative
	B1.rpt.d	no EIC peaks					1	Negative
	2.rpt.d	no EIC peaks					1	Negative
	B2.rpt.d	no EIC peaks					1	Negative
	3.rpt.d	no EIC peaks					1	Negative
	B5.rpt.d	no EIC peaks					1	Negative
	5.rpt.d	no EIC peaks					1	Negative

## Sheet: CPM PB & BW 4HHA
Area	File	Flags (Tgt)	Score (Tgt)	Score (MFE)	Height	Base Peak	Hits	Polarity	Mass	Time Segment	m/z	Diff (Tgt, ppm)	RT	Start	End	Width	Ions	Z Count	Min Z	Max Z
1162781	CPM0u_PB_rpt.d		94.54	100	137631	194.051	1	Negative	195.056	1	194.051	7.37	7.105	7.006	7.656	0.119	6	1	1	1
1058453	CPM0u_BW_rpt.d		91.01	100	116486	194.051	1	Negative	195.057	1	194.051	9	7.102	7.019	7.685	0.131	6	1	1	1
808380	CPM4u_BW_rpt.d		91.82	100	91361	194.051	1	Negative	195.057	1	194.051	8.99	7.108	7.025	7.718	0.124	6	1	1	1
431356	CPM4u_PB_rpt.d		94.79	100	52007	194.049	1	Negative	195.054	1	389.103	-5.12	7.126	7.01	7.493	0.115	6	1	1	1
5615	B3.rpt.d	m/z tolerance	47.89		849	291.085	1	Negative	195.052	1	194.047	-13.87	7.084	6.968	7.201	0.109	2	1	1	1
4407	B2.rpt.d	m/z tolerance	16.68		628	291.085	1	Negative	195.052	1	194.047	-16.21	7.112	6.978	7.211	0.702	1	1	1	1
4401	B4.rpt.d	m/z tolerance	16.13		753	291.085	1	Negative	195.052	1	194.047	-16.46	7.088	6.971	7.188	0.128	1	1	1	1
4249	4.rpt.d	low score	33.61		708	291.085	1	Negative	195.053	1	194.048	-9.34	7.066	6.983	7.199	0.109	1	1	1	1
3051	1.rpt.d	low score	71.92		553	291.086	1	Negative	195.054	1	194.048	-8.16	7.064	6.964	7.164	0.118	2	1	1	1
2892	B1.rpt.d	low score	33.6		537	291.085	1	Negative	195.053	1	194.048	-9.35	7.042	6.959	7.142	0.107	1	1	1	1
2712	5.rpt.d	m/z tolerance	25.67		592	291.085	1	Negative	195.053	1	194.047	-12.44	7.058	6.991	7.158	0.073	1	1	1	1
2437	3.rpt.d	low score	38.1		598	291.085	1	Negative	195.054	1	194.048	-7.47	7.07	6.97	7.137	0.055	1	1	1	1
1735	B5.rpt.d	m/z tolerance	30.21		388	291.085	1	Negative	195.053	1	194.048	-10.68	7.127	7.01	7.144	0.098	1	1	1	1
1455	2.rpt.d	low score	41.07		497	291.085	1	Negative	195.054	1	194.048	-6.09	7.102	7.002	7.152	0.081	1	1	1	1
	22 Mixed Stds.d	RT tolerance					1	Negative

## Sheet: CPM PB & BW HHA
Area	File	Flags (Tgt)	Score (Tgt)	Score (MFE)	Height	Base Peak	Hits	Polarity	Mass	Time Segment	m/z	Diff (Tgt, ppm)	RT	Start	End	Width	Ions	Z Count	Min Z	Max Z
433269	CPM0u_BW_rpt.d		88.07	100	54696	194.051	1	Negative	195.056	1	194.051	-0.28	6.786	6.688	7.019	0.108	4	1	1	1
314946	CPM4u_BW_rpt.d		87.86	100	39136	194.051	1	Negative	195.056	1	194.051	-1.35	6.775	6.663	7.025	0.107	3	1	1	1
273542	CPM0u_PB_rpt.d		86.91	100	38081	219.003	1	Negative	195.057	1	194.052	1.81	6.772	6.694	7.006	0.098	4	1	1	1
120948	CPM4u_PB_rpt.d	m/z tolerance	48.35	100	15238	218.999	1	Negative	195.053	1	194.047	-19.65	6.793	6.695	7.01	0.105	2	1	1	1
1670	B3.rpt.d	m/z tolerance	22.35		412	291.085	1	Negative	195.054	1	194.048	-13.76	6.751	6.635	6.801	0.559	1	1	1	1
902	B2.rpt.d	m/z tolerance	31.01		238	291.085	1	Negative	195.054	1	194.049	-10.36	6.745	6.629	6.778	0.32	1	1	1	1
	22 Mixed Stds.d	no EIC peaks		0			1	Negative
	B1.rpt.d	no EIC peaks					1	Negative
	2.rpt.d	no EIC peaks					1	Negative
	B5.rpt.d	no EIC peaks					1	Negative
	B4.rpt.d	no EIC peaks		37.4			1	Negative
	1.rpt.d	no EIC peaks					1	Negative
	5.rpt.d	no EIC peaks					1	Negative
	4.rpt.d	no EIC peaks					1	Negative
	3.rpt.d	no EIC peaks					1	Negative

[truncated: 32 more sheets: CPM PB&BW Sinapic sulphate, CPM PB&BW Feruloglycine, CPM PB&BW D3OS, CPM PB&BW F4OS, CPM PW & SW, CPM PW & SW hippuric acid, CPM PW & SW PCA, CPM PW&SW caffeic, CPM PW&SW 4HHA, CPM PW&SW HHA, CPM PW&SW sinapic sulphate, CPM PW&SW Ferulogylcine, CPM PW&SW D30S, CPM PW&SW F4OS, Sheet20, TDAM PB & BW, TDAM PB&BW hippuric acid, TDAM PB&BW caffeic, TDAM PB & BW PCA, TDAM PB&BW HHA …]
